# Supplementary material for: Nanoscale cooperative adsorption for materials control
Source: PubMed Central journal article supplement (PMC8277846; doi:10.1038/s41467-021-24590-y), 2021-07-13
Supplement: 41467_2021_24590_MOESM1_ESM.pdf [file 41467_2021_24590_MOESM1_ESM.pdf]

506 **Supplementary Information**

507

508 **Nanoscale cooperative adsorption for materials control**

509

510 Rong Ye<sup>†</sup>, Ming Zhao<sup>†</sup>, Xianwen Mao, Zhaohong Wang, Diego A. Garzón, Heting Pu, Zhiheng Zhao,  
511 Peng Chen\*

512

513 <sup>†</sup>These authors contributed equally to this work.

514 \*Correspondence to: [pc252@cornell.edu](mailto:pc252@cornell.edu)

515

|     |                                                                                                                                                                       |    |
|-----|-----------------------------------------------------------------------------------------------------------------------------------------------------------------------|----|
| 516 | Table of Contents                                                                                                                                                     |    |
| 517 |                                                                                                                                                                       |    |
| 518 | 1 Supplementary Materials and methods.....                                                                                                                            | 3  |
| 519 | 1.1 General chemicals and instruments .....                                                                                                                           | 3  |
| 520 | 1.2 Synthesis and characterization of mesoporous-silica-coated Au nanoplates .....                                                                                    | 3  |
| 521 | 1.2.1 Synthesis and morphology characterization of Au nanoplates via electron microscopy .....                                                                        | 3  |
| 522 | 1.2.2 Mesoporous silica shell coating, thickness characterization, and subsequent ligand removal.....                                                                 | 3  |
| 523 | 1.2.3 The necessities and advantages of the mesoporous silica shell .....                                                                                             | 5  |
| 524 | 1.3 Synthesis and characterization of mesoporous-silica-coated Au nanorods.....                                                                                       | 6  |
| 525 | 1.3.1 Synthesis and morphology characterization of Au nanorods via electron microscopy.....                                                                           | 6  |
| 526 | 1.3.2 Preparation and characterization of mesoporous-silica-coated Au nanorods and ligand removal.....                                                                | 7  |
| 527 | 1.4 Electrochemical UPD of Pb on Au nanoparticles and confirmation of facet assignments of Au nanoplates and nanorods.....                                            | 7  |
| 528 | 1.5 Hill model of cooperative adsorption and the equation derivation for analyzing COMPEITS titration comprising cooperative adsorption of the competitor .....       | 8  |
| 529 | 1.6 Bulk measurements confirm the Langmuir-Hinshelwood kinetics of the fluorogenic auxiliary reaction, in which the reactant resazurin adsorbs noncooperatively ..... | 10 |
| 530 | 1.7 Single-molecule fluorescence imaging experiments.....                                                                                                             | 11 |
| 531 | 1.8 Single-molecule fluorescence image analysis .....                                                                                                                 | 12 |
| 532 | 1.8.1 Single-molecule fluorescence image analysis for super-resolution localization.....                                                                              | 12 |
| 533 | 1.8.2 Quantitative single-molecule counting algorithm to correct for over-counting and underestimation of product molecules                                           |    |
| 534 | 14                                                                                                                                                                    |    |
| 535 | 1.8.3 Overlay of SEM and optical microscopy (OM) images .....                                                                                                         | 15 |
| 536 | 1.8.4 Obtaining $v_R$ for a whole particle or different sub-particle sections .....                                                                                   | 16 |
| 537 | 1.9 Facet-controlled synthesis of colloidal Au nanoparticles in the presence of increasing [CTAB] and their SEM                                                       |    |
| 538 | characterization: transition from irregular-shaped nanoparticles to high-quality nanoplates .....                                                                     | 17 |
| 539 | 2 Supplementary bulk reaction titration confirms: (1) CTAB/CTAOH/CTAC adsorb with positive cooperativity; (2) PVPs                                                    |    |
| 540 | adsorb with negative cooperativity; (3) I <sup>-</sup> /Br <sup>-</sup> /BME adsorb non-cooperatively; (4) monomeric VP, EtOH, and K <sup>+</sup> have negligible     |    |
| 541 | adsorption; (5) [NH <sub>2</sub> OH] is saturated for the fluorogenic reaction kinetics.....                                                                          | 18 |
| 542 | 3 Supplementary results of single-molecule reaction imaging and COMPEITS imaging of single 5-nm Au nanoparticles .....                                                | 20 |
| 543 | 3.1 Super-resolution images of fluorogenic auxiliary reaction and COMPEITS images of ligand adsorption .....                                                          | 20 |
| 544 | 3.2 Possible residual citrate in solution does not affect the results from 5-nm Au nanoparticles .....                                                                | 22 |
| 545 | 3.3 Decrease of reaction rates during COMPEITS titration is not due to catalyst deactivation.....                                                                     | 23 |
| 546 | 3.4 Ligand adsorption titration curves: adsorption affinity and (non)cooperativity of CTAB/CTAOH/CTAC, PVPs, halides, and                                             |    |
| 547 | thiol 23                                                                                                                                                              |    |
| 548 | 4 Supplementary results of COMPEITS imaging of ligand adsorption on single Au nanoplates.....                                                                         | 25 |
| 549 | 4.1 COMPEITS images indicate spatially (in)homogeneous adsorption on single nanoplates of different ligands .....                                                     | 25 |
| 550 | 4.2 The decrease in reaction rates during COMPEITS titration is not due to catalyst deactivation.....                                                                 | 26 |
| 551 | 4.3 Additional statistical plots of $K$ and $h$ of ligand adsorption on single nanoplates reveal sub-particle and sub-facet differences                               |    |
| 552 | 27                                                                                                                                                                    |    |
| 553 | 4.4 Particle-averaged titration analyses also identify sub-particle differences in ligand adsorption .....                                                            | 29 |
| 554 | 4.5 Adsorption strength and cooperativity vs. nanoplate size and shape .....                                                                                          | 31 |
| 555 | 5 Supplementary results of COMPEITS imaging of ligand adsorption on single Au nanorods .....                                                                          | 33 |
| 556 | 5.1 Additional statistical plots of $K$ and $h$ of ligand adsorption on single nanorods reveal sub-particle and sub-facet differences                                 |    |
| 557 | 33                                                                                                                                                                    |    |
| 558 | 5.2 Particle-averaged titration analyses also identify sub-particle differences in ligand adsorption .....                                                            | 34 |
| 559 | 5.3 Adsorption strength and cooperativity vs. nanorod size .....                                                                                                      | 36 |
| 560 | 5.4 Contributions of under-coordinated atoms are insignificant compared with facet orientations .....                                                                 | 38 |
| 561 | 6 Supplementary control experiments and discussions on facet-controlled synthesis of Au nanoparticles demonstrating the                                               |    |
| 562 | crossover behavior of ligand adsorption .....                                                                                                                         | 38 |
| 563 | 6.1 Ascorbic acid/ascorbate adsorption onto Au particles are likely insignificant in the presence of CTAB .....                                                       | 38 |
| 564 | 6.2 Potential contribution of Au species adsorption in the facet-controlled Au nanoparticle synthesis.....                                                            | 39 |
| 565 | 6.3 The CTAB concentrations in Au nanoparticle syntheses are all below the critical micelle concentration at the reaction                                             |    |
| 566 | temperature .....                                                                                                                                                     | 40 |
| 567 | 6.4 Possible reasons for the existence of crossover behavior of CTAB adsorption on Au{110} vs. Au{111} .....                                                          | 40 |
| 568 | 6.5 Predicting the crossover concentration $c_x$ .....                                                                                                                | 41 |
| 569 | 6.6 Potential broader applications of the crossover behavior of ligand adsorption.....                                                                                | 41 |
| 570 | 6.7 Predicting relative multi-layer adsorption trends.....                                                                                                            | 42 |
| 571 | 6.8 The crossover behavior in our shape-controlled synthesis of Au nanoparticles should not be caused by the seeding effect....                                       | 42 |
| 572 | 7 Supplementary references.....                                                                                                                                       | 42 |
| 573 |                                                                                                                                                                       |    |
| 574 |                                                                                                                                                                       |    |
| 575 |                                                                                                                                                                       |    |

## 576 1 Supplementary Materials and methods

### 577 1.1 General chemicals and instruments

578 3-mercaptopropyltrimethoxysilane (MPTMS, 95%, 175617), tetraethylorthosilicate (TEOS, 98%,  
579 131903), sodium borohydride ( $\text{NaBH}_4$ , 99%, 213462), L-ascorbic acid ( $\geq 99.0\%$ , A1417),  
580 polyvinylpyrrolidone (average  $M_w \sim 55,000$ , 856568), polyvinylpyrrolidone (average  $M_w$  40,000, PVP40),  
581 polyvinylpyrrolidone (average  $M_w$  10,000, PVP10), 2-mercaptoethanol (BME,  $\geq 99.0\%$ , M6250),  
582 cetyltrimethylammonium chloride solution (CTAC, 25 wt. % in  $\text{H}_2\text{O}$ , 292737),  
583 hexadecyltrimethylammonium hydroxide solution (CTAOH, 10 wt. % in  $\text{H}_2\text{O}$ , 439231), potassium bromide  
584 (KBr, anhydrous,  $\geq 99.9\%$  trace metals basis, 449970), lead nitrate ( $\text{Pb}(\text{NO}_3)_2$ ,  $\geq 99.0\%$ , 228621), and  
585 hydroxylamine hydrochloride ( $\text{NH}_2\text{OH}\cdot\text{HCl}$ , 99%, 159417) were purchased from Sigma-Aldrich. Sodium  
586 silicate nonahydrate (S25567), sodium hydroxide (Pellets, S318), sodium citrate ( $\text{Na}_3\text{Cit}$ , S279-500),  
587 acetone (A19-1), and absolute ethanol (200 proof, BP2818-4) were purchased from Fisher Scientific. Other  
588 chemicals included hydrogen tetrachloroaurate ( $\text{HAuCl}_4$ , 99.999%, Beantown Chemical, 131445),  
589 cetyltrimethylammonium bromide (CTAB, 99+%, Acros Organics, 22716), potassium iodide (KI, 99.5%,  
590 Fluka, 60399), Gold colloid (5 nm, Ted Pella, 15702). All chemicals above were used without further  
591 treatment unless otherwise noted. Lemon grass was purchased from Wegmans store in Ithaca, NY, and  
592 thoroughly cleaned by water. Resazurin sodium salt (Molecular Probes, Thermo Fisher Scientific, R12204)  
593 was purified via thin layer chromatography before use. All  $\text{H}_2\text{O}$  used was purified via an Elga water  
594 purification system to reach the resistivity of  $18.2 \text{ M}\Omega/\text{cm}$ .

595 The UV-Vis absorption spectra were obtained with a Beckman Coulter DU 800 spectrometer and  
596 the fluorescence emission spectra were recorded on a Varian Cary Eclipse fluorescence spectrometer.  
597 Transmission electron microscopy (TEM) was performed either on a FEI F20 TEM STEM operated at 200  
598 kV or FEI Tecnai Spirit Twin operated at 120 kV at the Cornell Center for Materials Research (CCMR).  
599 Zeiss Gemini 500 Scanning Electron Microscope (SEM) operated at 10~15 keV at CCMR was used to  
600 capture SEM images. COMPEITS imaging experiments were carried out on a home-built microscope (see  
601 1.6).

### 602 1.2 Synthesis and characterization of mesoporous-silica-coated Au nanoplates

#### 603 1.2.1 Synthesis and morphology characterization of Au nanoplates via electron microscopy

604 Au nanoplates were synthesized following a procedure modified from a previous report<sup>1,2</sup>.  
605 Typically, 10 g of cleaned and finely cut lemon grass was boiled with 50 mL water for 6 min. After  
606 removing the solids via centrifugation at 3000 g for 6 min, the supernatant was mixed with 200 mL of 1  
607 mM  $\text{HAuCl}_4$  and then allowed to be shaken at 0.5 Hz at room temperature overnight. The products were  
608 collected via centrifugation at 3000 g, followed by washing with water for three cycles. The morphology  
609 and shape yield of the sample were examined by TEM. Supplementary Fig. 1a shows TEM images of as-  
610 synthesized Au nanoplates, which exhibit triangular and hexagonal shapes. On average, the radius (the  
611 mean distance from the center to the vertex) of the nanoplates is  $0.93 \pm 0.34 \mu\text{m}$  (Supplementary Fig. 1d)  
612 from the 236 nanoplates imaged in this work, and Supplementary Fig. 1e shows the shape distribution of  
613 these nanoplates. The thickness of such Au nanoplates is  $14 \pm 1 \text{ nm}$  from atomic force microscopy in our  
614 previous work<sup>2</sup>.

615 Earlier structural characterizations by multiple groups showed that the nanoplates were oriented  
616 with  $\{111\}$  planes as their basal planes and bounded by  $\{110\}$  planes at the edges<sup>3-6</sup>. Such facet assignment  
617 is also confirmed by electrochemical underpotential Pb deposition that resolved the deposition potentials  
618 on the two respective facets (see Section 1.4 later and Supplementary Fig. 2a).

#### 619 1.2.2 Mesoporous silica shell coating, thickness characterization, and subsequent ligand removal

620 The as-synthesized Au nanoplates were then coated with mesoporous silica in three major steps as  
621 previously reported<sup>2,7-10</sup>: (I) coating the particles with a thin silica layer, following the Ströber method<sup>9</sup>; (II)

622 further growth of the silica layer to a shell of a desired thickness; (III) etching the silica shell to make it  
623 mesoporous. Briefly, for Step I, Au nanoparticles dispersed in water were diluted to 30 mL with water and  
624 was mixed with 7.5  $\mu\text{L}$  of freshly prepared 20 mM 3-mercaptopropyltrimethoxysilane (MPTMS) in acetone  
625 while stirring vigorously. After 30 min, 1 mL of freshly prepared aqueous solution of 0.54% w/v  $\text{Na}_2\text{SiO}_3$   
626 (pH 10-11) was added dropwise and kept stirring for 48 h at room temperature. Afterwards, the reaction  
627 mixture was centrifuged at 1000 g for 20 min to precipitate the nanoparticles. In Step II, the Au  
628 nanoparticles were re-suspended in 30 mL EtOH/ $\text{H}_2\text{O}$  mixture (2.5:1 v/v), to which 350  $\mu\text{L}$  of 0.1 M NaOH  
629 was added followed by 30  $\mu\text{L}$  of tetraethylorthosilicate (TEOS). The mixture was stirred for at least 1 d at  
630 room temperature. The resulting Au nanoparticles were collected via centrifugation at 1000 g for 10 min.  
631 In Step III, the silica-coated nanoparticles were re-suspended in 20 mL  $\text{H}_2\text{O}$ /EtOH mixture (4:1 v/v)  
632 saturated with CTAB. 150  $\mu\text{L}$  of 0.1 M NaOH was added and stirred at room temperature for 15 min. The  
633 solution was heated in a 70  $^\circ\text{C}$  water bath for  $\sim 2$  h. The mesoporous-silica-coated Au ( $\text{Au@mSiO}_2$ )  
634 nanoparticles were collected after centrifugation at 1000 g for 10 min, followed by washing with water for  
635 at least three times. Supplementary Fig. 1b-c are representative TEM and SEM image of  $\text{Au@mSiO}_2$   
636 nanoplates after washing, respectively. The average thickness of the mesoporous silica shell is  $39 \pm 6$  nm  
637 (Supplementary Fig. 1f). Based on this method, the mesoporous silica shells have NaOH-etched pores with  
638 an average pore size of  $\sim 35 \text{ \AA}$ <sup>8</sup>, which enables reactants and products to freely diffuse in and out of these  
639 pores.

640 The organic ligands bound to the Au surface, including CTAB, were removed by UV-ozone  
641 treatment before imaging studies, following literature procedures<sup>2,11</sup>. Briefly, the washed  $\text{Au@mSiO}_2$   
642 nanoplates were dispersed on a quartz slide, dried, and placed  $\sim 2$  cm below a UV lamp (UVP Pen-Ray 90-  
643 0012-01 Model 11SC-1 Mercury UV Lamp, 254 nm Longwave) in air for about 12 hours.



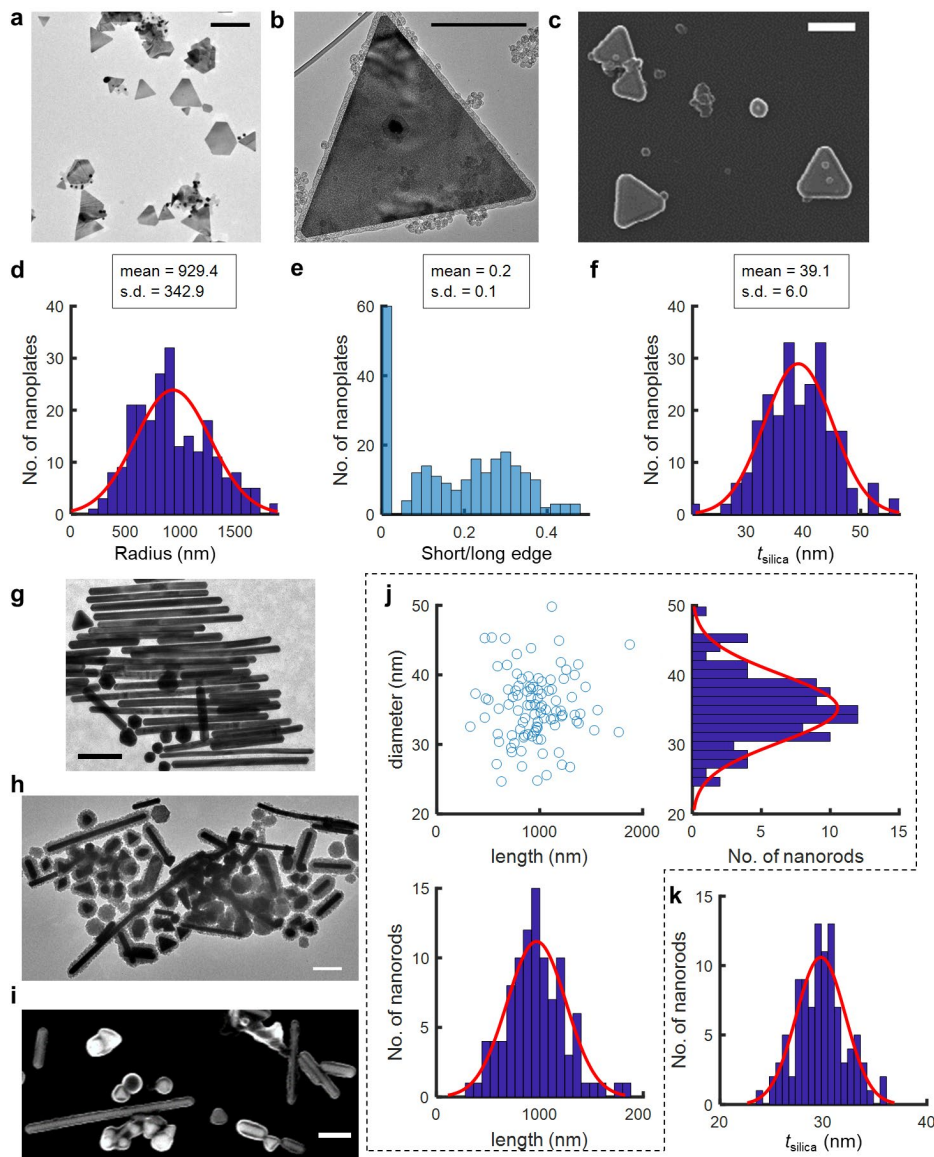

644  
 645 **Supplementary Fig. 1 | Electron microscopy characterizations of Au nanoplates and nanorods.** a-b, Representative TEM  
 646 images of Au nanoplates, as-synthesized (a) and after coating with mesoporous silica (b). c, Representative SEM image of  
 647 mesoporous-silica-coated Au nanoplates. Samples in (b-c) were before UV-ozone treatment. Scale bars are 500 nm in (a-c). d-f,  
 648 Distribution of the radius, i.e., the averaged distance from the center to the vertex (d), short/long edge length ratio, which is 0 for a  
 649 triangle and 1 for an equilateral hexagon (e), and the thickness of the mesoporous silica shell  $t_{\text{silica}}$  (f) of the 236 nanoplates imaged  
 650 in this work. Red lines in d and f are Gaussian fits. g-h, Representative TEM images of Au nanorods, as-synthesized (g) and  
 651 after coating with mesoporous silica (h). i, Representative SEM image of mesoporous-silica-coated Au nanorods. Samples in h-i  
 652 were before UV-ozone treatment. Scale bars are 200 nm in g-i. j, Correlation of the length and the diameter (the width) of the 100  
 653 nanorods chosen for COMPEITS analysis, along with the histograms. Red lines are Gaussian fits. The average length is  $0.97 \pm 0.29$   
 654  $\mu\text{m}$ , and the average diameter is  $35 \pm 5$  nm. k, The thickness of the mesoporous silica shell  $t_{\text{silica}}$  of the corresponding nanorods.  
 655 The average thickness is  $30 \pm 2$  nm.

656 1.2.3 The necessities and advantages of the mesoporous silica shell

657 The mesoporous silica shell on the Au nanoplates or nanorods (see later) offers a number of benefits  
 658 for both the single-molecule catalysis imaging experiments and the catalytic activity study:

- 659 1) The mesoporous silica shell enables the stabilization and dispersion of Au nanoparticles in solution  
 660 upon the removal of their surface organic capping ligands. Organic ligands such as CTAB are

661 involved in the preparation of these Au nanoparticles for stability, dispersion, and shape control in  
662 the solution. It is essential to remove these ligands for the clean measurement of the adsorption  
663 interaction between the Au nanoparticles and the capping ligands including CTAB.

- 664 2) These organic ligands passivate the surface of the nanoparticles and lower their catalytic activity.  
665 Without the mesoporous silica shell, the nanoparticles would aggregate after the ligand removal  
666 (e.g., via UV-Ozone treatment; see section 1.2.2), and also be difficult to be re-dispersed. Thus, the  
667 silica shell facilitates the removal of organic ligands for the high catalytic activity necessary for the  
668 COMPEITS experiments.
- 669 3) The mesoporous silica shell can also *temporarily* trap the catalytically produced fluorescent probe  
670 molecules (i.e., resorufin) near the surface of the Au nanoparticles. These probe molecules are  
671 trapped inside the shell nearby the locations where they were catalytically generated, enabling the  
672 detection of their production locations (active sites) at the single-molecule level before they diffuse  
673 away into the surrounding solution.
- 674 4) The mesoporous silica shell allows for the detection of fluorescent probe molecules away from the  
675 metallic surface of the nanoparticles, where the fluorescence quenching by the Au surface might  
676 impede the imaging. In our experience, detecting the fluorescence of resorufin directly on the  
677 surface of these nanoplates and nanorods of such sizes is problematic.
- 678 5) The mesoporous silica shell stabilizes the nanoparticles morphology during the catalysis imaging.  
679 Nanoparticles, especially those with well-defined facets, are known to be susceptible to surface  
680 restructuring in the catalytic process. The shell covers the surfaces of Au nanoparticles and  
681 increases the stability of their morphology and crystallographic orientation during catalytic  
682 reactions. Consistently, we did not observe discernible morphology changes in these Au@mSiO<sub>2</sub>  
683 nanoparticles after the catalysis imaging<sup>2,7</sup>.

684 Many evidences support that the mesoporous silica shell has insignificant effect on the adsorption  
685 cooperativity trends observed in our measurements:

- 686 1) The cooperative adsorption for CTAB (and PVP) occurs both in the absence (5-nm Au  
687 nanoparticles) and in the presence (nanoplates and nanorods) of the shell. Therefore, this shell does  
688 not render cooperativity.
- 689 2) The magnitude of  $h$  for CTAB adsorption on 5-nm Au nanoparticles, Au nanoplates, and Au  
690 nanorods are all roughly 2 (or all roughly 0.7 for PVP). This similarity between the naked 5-nm Au  
691 nanoparticles and mesoporous-silica-coated nanoplate and nanorods further confirm that the silica  
692 shell does not render the measured cooperativity.
- 693 3) We persistently observed the anti-correlation between affinity and cooperativity for CTAB/PVP  
694 adsorption on 5-nm Au nanoparticles (without a silica shell) and nanoplates/nanorods (coated with  
695 mesoporous silica).
- 696 4) The {111} facet shows stronger cooperativity than the {110} facet, regardless of whether the {111}  
697 facet is located dominantly at low curvature regions (i.e., the top flat facet on nanoplates) or at high  
698 curvature regions (i.e., at the tips of nanorods) of the particle. Therefore, the presence of the  
699 mesoporous silica shell should not alter  $h$  biasedly or change the trends across regions.

700

### 701 **1.3 Synthesis and characterization of mesoporous-silica-coated Au nanorods**

#### 702 1.3.1 Synthesis and morphology characterization of Au nanorods via electron microscopy

703 Penta-twinned Au nanorods were synthesized in a three-step seed-mediated growth method  
704 following the literature<sup>12</sup>. Briefly, (A) Seeds@Citrate solution: At room temperature, 100  $\mu$ L of 50 mM  
705 HAuCl<sub>4</sub> was added to 20.0 mL of 0.25 mM Na<sub>3</sub>Cit. Next, 600  $\mu$ L of a freshly prepared 100 mM NaBH<sub>4</sub>  
706 solution was rapidly injected under vigorous stirring (>1400 rpm). After 2 min the solution was kept under  
707 mild stirring (400 rpm) for 40 min at room temperature and for 15 min at 40-45 °C before use. (B)  
708 Seeds@CTAB solution: 12.5  $\mu$ L of 50 mM HAuCl<sub>4</sub> was added to a mixture of 3 mL of water and 2 mL of

709 0.1 M CTAB. The solution was heated to over 30 °C to facilitate the dissolution of CTAB and then cooled  
710 down to 22 °C before use. 12.5 µL of 0.1 M AA was then added to the solution and shaken by hand; the  
711 mixture turned colorless in a few seconds. Finally, 835 µL of the Seeds@Citrate solution was added, shaken  
712 by hand and left undisturbed for 3 hours at 22 °C. (C) Growth solution: CTAB (4 mL 0.1 M) was added to  
713 46 mL of water. 0.125 mL of 0.05 M HAuCl<sub>4</sub> solution was then added; the solution was gently shaken and  
714 cooled down to 22 °C. Subsequently, 0.156 mL of 0.1 M AA solution was added to the mixture, and the  
715 solution was gently shaken until it turned completely colorless. Finally, 65 µL Seeds@CTAB was added to  
716 the growing mixture; the solution was vigorously shaken by hand and then left undisturbed overnight at  
717 20 °C. The resultant nanorods in solution, purple in color, were centrifuged at 300 g for 20 min and washed  
718 in ethanol, then water for three times. The morphology and shape yield of the nanoplates and nanorods were  
719 examined by TEM.

720 Supplementary Fig. 1g is a representative TEM image of the as-synthesized Au nanorods.  
721 Although the sample inevitably contained particles in other shapes, only nanorods longer than 100 nm  
722 visualized in SEM were chosen for further data analysis due to the spatial resolution of single-molecule  
723 super-resolution imaging (see later). Supplementary Fig. 1j shows the correlations of the length and the  
724 diameter (the width) of 100 nanorods analyzed for COMPEITS measurements, averaging at  $0.97 \pm 0.29$   
725 µm in length and  $35 \pm 5$  nm in diameter.

726 For penta-twinned nanorods, the tips were consistently assigned as having {111} facets, but the  
727 sides were assigned as {110} facets by El-Sayed et al. and Harmer et al.<sup>13,14</sup>, or {100} facets by Mann et  
728 al.<sup>15</sup>, even though Harmer et al.<sup>14</sup> and Mann et al.<sup>15</sup> followed the same synthesis procedure by Murphy et  
729 al.<sup>16</sup>. El-Sayed et al.<sup>13</sup> suggested that the higher energy {110} facets showed reconstruction into more stable  
730 {100} facets. Our cyclic voltammetry (CV) measurements of electrochemical underpotential deposition  
731 (UPD) of Pb on these Au nanorods (Section 1.4; Supplementary Fig. 2b) confirm that the sides are enclosed  
732 by {110} facets, which are higher in energy and have lower surface atom packing density than the tips'  
733 {111} facets.

### 734 1.3.2 Preparation and characterization of mesoporous-silica-coated Au nanorods and ligand removal

735 Our preparation of mesoporous-silica-coated Au nanorods follows the same protocol as the one for  
736 Au nanoplates. Supplementary Fig. 1h-i are representative TEM and SEM image of mesoporous-silica-  
737 coated Au nanorods, respectively. The average thickness of the mesoporous silica shell is  $30 \pm 2$  nm  
738 (Supplementary Fig. 1k). These nanorods also went through the UV-Ozone treatment for the removal of  
739 organic ligands before use, in the same way as the nanoplates.

## 740 1.4 Electrochemical UPD of Pb on Au nanoparticles and confirmation of facet assignments of Au 741 nanoplates and nanorods

742 The UPD of Pb on Au nanoparticles were carried out in a three-electrode cell using an  
743 electrochemical workstation (CHI 1200a potentiostat) following literature<sup>17,18</sup> (see Methods).  
744 Supplementary Fig. 2a shows the CV curve of the as-synthesized Au nanoplates (Supplementary Fig. 1a).  
745 Compared with the two small peaks at 0.53 & 0.67 V, the dominant peaks at 0.38 & 0.45 V suggest the  
746 prevalence of Au{111}, consistent with the feature of Au nanoplates whose large flat surfaces are {111}  
747 facets while the small side edges are {110} facets. Supplementary Fig. 2b shows the CV curve of Au  
748 nanorods (Supplementary Fig. 1g). The pair of peaks representing Au{110} located at 0.53 & 0.67 V are  
749 dominant in the curve, in agreement with and confirming that the side facets along the length of Au  
750 nanorods are {110} facets. The presence of Au{111} feature in the CV of Au nanorods can be attributed  
751 to: *i*) the {111}-enclosed penta-twinned structure at the two tips of Au nanorods; and *ii*) the presence of a  
752 small portion of {111}-dominant Au nanoplates and spheres in the sample (see Supplementary Fig. 1g).

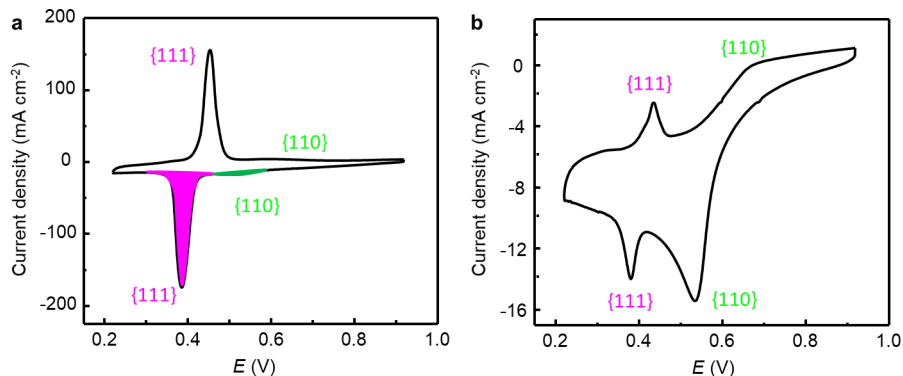

753  
 754 **Supplementary Fig. 2 | CV curves of Pb UPD on Au nanoplates (a) and nanorods (b), respectively.** The pronounced peaks at  
 755 0.38 & 0.45 V and 0.53 & 0.67 V in **a** and **b** suggest the dominance of Au{111} and Au{110} facets in nanoplates and nanorods,  
 756 respectively. The integrated deposition peak areas for Au{111} and Au{110} are represented by magenta and green colors,  
 757 respectively, in **a**.

758 **1.5 Hill model of cooperative adsorption and the equation derivation for analyzing COMPEITS**  
 759 **titration comprising cooperative adsorption of the competitor**

760 We consider resazurin (R) and a ligand L competitively adsorb on the same type of surface sites on  
 761 the catalyst surface, in which L can adsorb cooperatively and R follows the noncooperative Langmuir  
 762 adsorption (Section 1.6 later).

763 First, we consider the Hill cooperative adsorption of the ligand L on a cluster of  $h$  adsorption sites,  
 764 e.g., a patch of surface having  $h$  sites, in the absence of R. Note each adsorption site could comprise one or  
 765 more surface metal atoms, depending on the adsorption geometry of a particular ligand and on the particular  
 766 metal surface structure (e.g., different facets). We follow the all-or-none approximation used in the classic  
 767 Hill model<sup>19,20</sup>, i.e., the cluster is either bound by  $h$  ligands as  $M_h-L_h$ , or completely free of L, as shown in  
 768 the chemical equation:

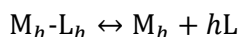

769 By definition, the dissociation equilibrium constant  $K_d$  follows

$$K_d = \frac{[M_h][L]^h}{[M_h-L_h]} = (1/K_L)^h \quad \text{Eq. S1}$$

770 where  $[M_h]$  and  $[M_h-L_h]$  are the concentrations of free and occupied adsorption clusters, respectively;  $K_L$  is  
 771 the inverse  $K_{0.5}$  seen in some textbooks<sup>21</sup> and has the inverse concentration unit, and can be considered an  
 772 apparent adsorption equilibrium constant. At  $[L] = 1/K_L$ ,  $[M_h] = [M_h-L_h]$ , i.e., half of the surface site clusters  
 773 have no ligand adsorbed while the other half are fully occupied by L. As each cluster has  $h$  sites, the  
 774 concentration of free adsorption sites,  $[M]$ , is given by

$$[M] = h[M_h] \quad \text{Eq. S2}$$

775 Combining Eq. S1 and Eq. S2, we get

$$[M_h-L_h] = \frac{1}{h} [M] (K_L [L])^h \quad \text{Eq. S3}$$

776 Second, considering the equilibrium of R adsorption (Langmuir adsorption, see Section 1.6) in the  
 777 absence of the competing ligand:

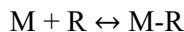

778  $K_R$ , the adsorption equilibrium constant of R, is

$$K_R = \frac{[M-R]}{[M][R]} \quad \text{Eq. S4}$$

780 where  $[M-R]$  is the concentration of surface sites occupied by R.

781 In the case of R and L co-adsorption in which they do not interact other than competing for the  
 782 surface adsorption sites, their respective adsorption equilibria still maintain as above. The equilibrium  
 783 equations above are still valid. The total concentration of surface adsorption sites  $[M]_T$  comprises three  
 784 components:

$$[M]_T = [M] + [M-R] + h[M_h-L_h] \quad \text{Eq. S5}$$

785 The coverage  $\theta_R$  of R on the adsorption sites, by definition, is

$$\theta_R = \frac{[M-R]}{[M]_T} \quad \text{Eq. S6}$$

786 Inserting Eq. S3 and Eq. S6 into Eq. S5, we get

$$\frac{[M-R]}{\theta_R} = [M] + [M-R] + [M](K_L[L])^h \quad \text{Eq. S7}$$

787 After inserting Eq. S4 into Eq. S7 and rearranging, we get

$$\theta_R = \frac{K_R[R]}{1 + K_R[R] + (K_L[L])^h} \quad \text{Eq. S8}$$

788 If  $N_R$  is the number of R molecules adsorbed on the surface sites of a catalyst particle, the reaction  
 789 rate for the consumption of R on one particle is

$$v_R \text{ (s}^{-1} \text{ particle}^{-1}) = k_i k_s N_R \quad \text{Eq. S9}$$

790 Here  $k_i$  is the rate constant representing the intrinsic reactivity per site for the catalytic conversion;  $k_s$  is a  
 791 scaling factor to describe the contribution of the co-reactant  $\text{NH}_2\text{OH}$  in the reaction and treated as a constant  
 792 because  $\text{NH}_2\text{OH}$  is kept as a constant large excess in the experiments.

793 Let  $N_T$  be the total number of surface sites on one catalyst particle

$$N_R = N_T \theta_R \quad \text{Eq. S10}$$

794 Therefore, combining Eq. S8, Eq. S9, and Eq. S10, we have

$$v_R = k_i k_s N_T \theta_R = k_R \theta_R = \frac{k_R K_R [R]}{1 + K_R [R] + (K_L [L])^h} \quad \text{Eq. S11}$$

795 in which  $k_R = k_i k_s N_T$  for brevity. Eq. S11 is give as Eq. 1 in the main text. When  $h = 1$ , i.e., no cooperative  
 796 adsorption for ligand L, Eq. S11 becomes the case that both the reactant R and the competitor follow  
 797 Langmuir adsorption, as the case in our initial development of COMPEITS imaging<sup>22</sup>.

798 *Note that the concept of a catalyst particle used in this derivation applies as well to an ensemble*  
 799 *of many particles or a unit surface area, so the equations are also applicable to describe those cases.*

800 Some other forms of Eq. S11 include:

$$v_R^{-1} = \frac{1}{k_R K_R [R]} + \frac{1}{k_R} + \frac{(K_L [L])^h}{k_R K_R [R]} \quad \text{Eq. S12}$$

801 Note in computing a COMPEITS image (e.g., Fig. 2a),  $\Delta(n^{-1}) \propto \Delta v_R^{-1} \propto (K_L [L])^h \propto (K_L)^h$ , as in  
 802 the following:

$$\Delta v_R^{-1} \equiv v_R^{-1}([L]) - v_R^{-1}([L] = 0) = \frac{(K_L[L])^h}{k_R K_R [R]} \propto (K_L[L])^h \propto (K_L)^h \quad \text{Eq. S13}$$

803 The Hill plot form of Eq. S11 is:

$$\log\left(\frac{k_R K_R [R]}{v_R} - K_R [R] - 1\right) \equiv Y = h \log [L] + h \log K_L \quad \text{Eq. S14}$$

804 Here  $Y$  vs.  $\log[L]$  is linear, and the slope is  $h$ , so-called Hill coefficient. *It is also worth noting that the Hill*  
 805 *model of cooperativity was formulated specifically to treat positive cooperativity, where the Hill coefficient*  
 806  *$h (>1)$  corresponds to the minimum number of ligands that adsorb simultaneously<sup>19</sup>. If the cooperativity is*  
 807 *negative,  $h$  is  $<1$  phenomenologically within the Hill model, but the physical interpretation of the value of*  
 808  *$h$  is undefined. For both cases, further deviation from  $h = 1$  means larger cooperativity.*

### 809 1.6 Bulk measurements confirm the Langmuir-Hinshelwood kinetics of the fluorogenic auxiliary 810 reaction, in which the reactant resazurin adsorbs noncooperatively

811 Bulk-level measurements of the fluorogenic auxiliary reaction kinetics (with and without ligand  
 812 competition) not only confirm the validity of the COMPEITS approach on the sub-particle level, but also  
 813 provide guidance on the choice of titration conditions for the single-molecule imaging experiments (see  
 814 Methods).

815 The reaction rate  $v_R$  follows the Langmuir-Hinshelwood kinetics, as we showed earlier<sup>23</sup>:

$$v_R = \frac{k_R K_R [R]}{1 + K_R [R]} \quad \text{Eq. S15}$$

816  $k_R$  and  $K_R$  can be obtained via data fitting. If considering the cooperative adsorption of R, based on the Hill  
 817 model,  $v_R$  would follow

$$v_R = \frac{k_R (K_R [R])^{h_R}}{1 + (K_R [R])^{h_R}} \quad \text{Eq. S16}$$

818 Both Eq. S15 and Eq. S16 can fit the experimental  $v_R$ -[R] satisfactorily with equal quality (the two curves  
 819 are overlapping with each other, Supplementary Fig. 3c). The fitted Hill coefficient  $h_R$  using Eq. S16 is 1  
 820 within experimental error, confirming that R does not adsorb cooperatively. Therefore, the Langmuir-  
 821 Hinshelwood kinetics, i.e., Eq. S15, is sufficient for describing the catalytic kinetics of R to resorufin  
 822 conversion, consistent with our previous work<sup>23</sup>.

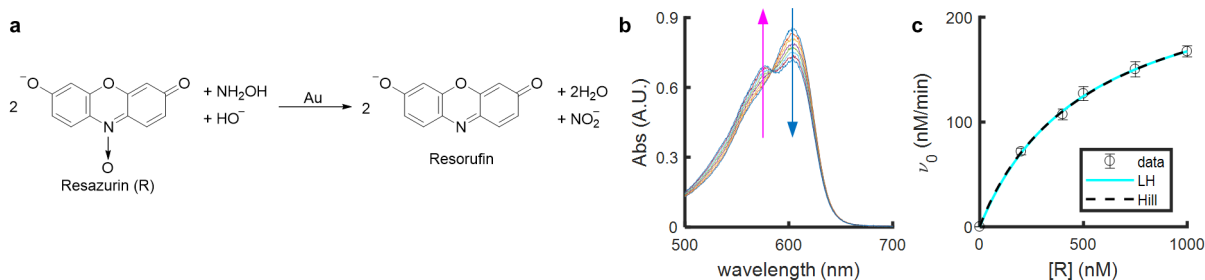

823  
 824 **Supplementary Fig. 3 | Bulk measurements of 5-nm Au-nanoparticle catalyzed reduction of resazurin by**  
 825 **NH<sub>2</sub>OH.** **a**, Chemical equation of the fluorogenic auxiliary reaction. **b**, In situ absorption measurements of the reduction of R by  
 826 NH<sub>2</sub>OH catalyzed by Au nanoparticles in an aqueous solution. [R]<sub>0</sub> = 4.0 μM; [NH<sub>2</sub>OH]<sub>0</sub> = 1.0 mM; [Au nanoparticle] = 0.010 nM  
 827 (based on particles instead of atoms), in 7 mM pH 7.4 phosphate buffer. The blue and magenta arrows indicate the decrease of R  
 828 peak at 602 nm and the increase of resorufin peak at 572 nm, respectively. **c**, The initial reaction rates vs. the R concentration.  
 829 [NH<sub>2</sub>OH]<sub>0</sub> = 1.0 mM; [Au nanoparticle] = 0.010 nM, in 7 mM pH 7.4 sodium phosphate buffer. Cyan solid line is the fits of Eq.  
 830 S15 (the Langmuir-Hinshelwood model) with  $k_R = 0.25 \pm 0.01$  μM/min,  $K_{Rz} = 1.9 \pm 0.2$  μM<sup>-1</sup>, the sum of squared residuals (SSR)  
 831 is 18.5; the black dash line is the fit of Eq. S16 (the Hill model), with  $k_R = 0.27 \pm 0.07$  μM/min,  $K_{Rz} = 1.7 \pm 1.0$  μM<sup>-1</sup>,  $h_R = 0.96 \pm$   
 832 0.23, the SSR is 17.9. Error bars are s.d.

833 Next, the reaction rates were measured in the presence of different concentrations of ligands while  
834 keeping the concentration of R and everything else the same. In Eq. S11,  $[R]$  is known, and  $k_R$  and  $K_R$   
835 obtained from Eq. S15 are used, while  $K_L$  and  $h$  (set as floating parameters) are obtained via fitting the  $v_R$ -  
836  $[L]$  curve. Note that the value of  $K_R$  may vary due to the brand, amount, and freshness of 5-nm Au  
837 nanoparticles used, and it is the best practice to sonicate the stock solution before use to improve the quality  
838 and reproducibility of the results.

839 The results of bulk titration of ligands will appear in Section 2.

## 840 1.7 Single-molecule fluorescence imaging experiments

841 All single-molecule fluorescence microscopy experiments for COMPEITS imaging were carried  
842 out on a home-built prism-type wide-field total internal reflection fluorescence (TIRF) microscope  
843 (Olympus IX71, Supplementary Fig. 4a). A continuous wave circularly polarized 532 nm laser beam  
844 (CrystaLaser-GCL-025-L-0.5%) of  $\sim 10$  mW was focused onto the sample (of  $\sim 60 \times 100 \mu\text{m}^2$ ) in a flow cell  
845 to directly excite the fluorescence of the catalytic product resorufin (Supplementary Fig. 4). A flow cell,  
846  $100 \mu\text{m}$  (height)  $\times 5$  cm (length)  $\times 1$  cm (width), formed by double-sided tape sandwiched between a quartz  
847 slide (Technical Glass) and a borosilicate coverslip (Gold Seal), was used to hold aqueous reactant solutions  
848 (and the competing ligand when applicable) for single-molecule fluorescence imaging measurements. The  
849 fluorescence emitted by the product was collected by a  $60\times$  NA1.2 water-immersion objective  
850 (UPLSAPO60XW, Olympus), filtered (HQ580m60, Chroma), and detected by a back-illuminated ANDOR  
851 iXon EMCCD camera (DU897D-CS0-#BV) operated at 30 ms frame rate for nanoplates or nanorods, and  
852 100 ms per frame for 5-nm nanoparticles.

853 The 5-nm Au nanospheres, Au@mSiO<sub>2</sub> nanoplates or nanorods were dispersed on the quartz slide  
854 via drop-casting, dried, immobilized by heating in an oven at  $\sim 60$  °C for 1-2 h, and then assembled into a  
855 microfluidic cell after UV-Ozone treatment. Reactant solutions were supplied into the flow cell at designed  
856 concentrations in a continuous flow at  $10 \mu\text{L min}^{-1}$  driven by a syringe pump (Chemyx incorporation). This  
857 flow-cell based reaction scheme provided a steady-state reaction condition, under which all single-molecule  
858 catalytic kinetics was measured.

859 Reductive deoxygenation of R to resorufin by NH<sub>2</sub>OH (Supplementary Fig. 3a) was used as the  
860 fluorogenic auxiliary reaction for the COMPEITS imaging. Titration of R was performed for every sample  
861 considering the heterogeneity among single particles. All single-molecule imaging experiments were  
862 carried out at room temperature with 1 mM NH<sub>2</sub>OH in 7 mM pH 7.4 phosphate buffer. The high NH<sub>2</sub>OH  
863 concentration was to maintain a large excess so that NH<sub>2</sub>OH is not a rate-limiting reagent in the catalysis  
864 (Supplementary Fig. 9m). Typically, 30,000 to 90,000 frames at 30 ms per frame were collected at one  
865 reactant concentration; 4 different reactant solutions with increasing concentrations of R from 0 to 0.3  $\mu\text{M}$   
866 were imaged, followed by 4 solutions with the highest concentration of R and increasing concentrations of  
867 a ligand. The concentrations of the ligands ranged from nM to mM, depending on the adsorption affinity of  
868 the ligands.

869

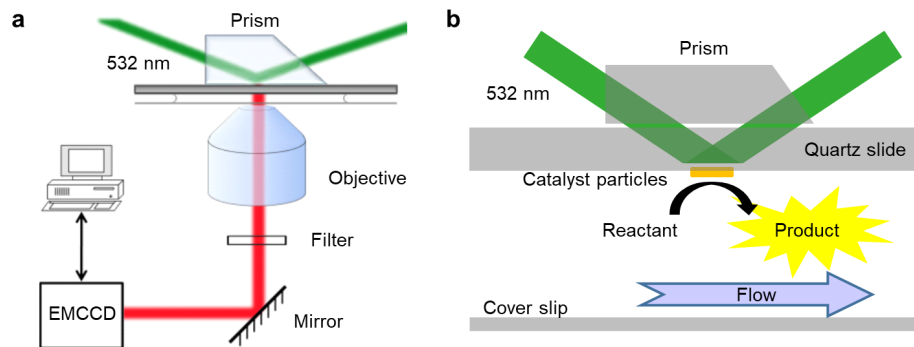

870  
 871 **Supplementary Fig. 4 | The setups of imaging experiments.** a, Schematics of prism-type TIRF microscope set up. Adapted with  
 872 permission from ref<sup>24</sup>. b, Schematics of the flow reactor cell.

## 873 1.8 Single-molecule fluorescence image analysis

### 874 1.8.1 Single-molecule fluorescence image analysis for super-resolution localization

#### 875 Identifying single fluorescent molecules

876 Information of single-molecule catalysis was extracted using a home-written MATLAB program  
 877 from the fluorescence images in the movies, ‘subtraction iQPALM’ (image-based quantitative photo-  
 878 activated localization microscopy, see Methods, Supplementary Codes). Briefly, each fluorescence image  
 879 was first background subtracted to remove the constant emission from Au@mSiO<sub>2</sub> nanoplates or nanorods,  
 880 where drift correction was also performed frame by frame so that the background was properly generated  
 881 and subtracted. Such background subtraction is not needed for 5-nm Au nanoparticles. Afterwards, any  
 882 pixel whose intensity value was greater than the mean pixel intensity plus 3~6 standard deviations was  
 883 considered as a potential candidate product<sup>22</sup>. This intensity threshold typically yielded < 20 candidates per  
 884 frame (each frame typically 60 × 100 μm<sup>2</sup>). Usually a field of view (i.e., the image frame) from the optical  
 885 microscope contained 20~50 particles, but only isolated individual particles with the targeted shapes  
 886 (confirmed by SEM imaging) were selected for further analysis.

887 The centroid position ( $x_0, y_0$ ) of each candidate product was determined by fitting a 13 × 13 pixel<sup>2</sup>  
 888 area centered at the molecule’s coordinate with a 2D Gaussian point spread function (PSF) (Eq. S17), where  
 889  $I(x, y)$  is the EMCCD fluorescence intensity counts (cts) of the candidate at position ( $x, y$ ) (nm); and  $A, B,$   
 890 and  $(\sigma_x, \sigma_y)$  are the amplitude, background, and standard deviations of the fitted 2D Gaussian function,  
 891 respectively.

$$892 I(x, y) = A e^{-\frac{1}{2}\left(\frac{x-x_0}{\sigma_x}\right)^2 - \frac{1}{2}\left(\frac{y-y_0}{\sigma_y}\right)^2} + B \quad \text{Eq. S17}$$

892 The values of  $\sigma_x$  and  $\sigma_y$  (Supplementary Fig. 5a-b) confirm the detection of single molecules (see 1.8.2  
 893 below)<sup>25</sup>.

894 The total number of fluorescence photons ( $N$ ) was obtained via Eq. S18, where  $g, S,$  and  $QE$  are  
 895 the EM gain (unitless), sensitivity (electrons per count), and quantum yield (unitless) of the EMCCD camera  
 896 in the spectral range of detected fluorescence, respectively. The constant 3.65 (eV per electron) accounts  
 897 for electron creation in silicon, and  $E_{hv}$  (= 2.12 eV) is the energy of an individual fluorescence photon from  
 898 the product molecule resorufin with an emission maximum wavelength at 585 nm.

$$899 N = 3.65 \frac{(\text{cts}/g)(S/QE)}{E_{hv}} \quad \text{Eq. S18}$$

899 The localization error ( $\text{Err}_i, i = x \text{ or } y$ ) of the centroid position was calculated as



$$Err_i = \sqrt{\frac{\sigma_i^2}{N} + \frac{a_i^2}{12N} + \frac{8\pi\sigma_i^2 b^2}{a_i^2 N^2}} \quad \text{Eq. S19}$$

900 where  $a$  is the pixel size, and  $b$  is the standard deviation of the spatially non-uniform image background<sup>7,26,27</sup>.  
 901 The one-dimensional localization error is typically  $\sim 27$  nm at 30 ms frame rate for imaging reactions on Au  
 902 nanoplates (Supplementary Fig. 5d-e) and can be  $\sim 10$  nm at 100 ms frame rate for imaging reactions on 5-  
 903 nm Au nanoparticles. The symbol  $N$  in Eq. S18 and Eq. S19 represents the number of photons impinging  
 904 on the camera and the number of photons detected, respectively. However, the ratio of these two numbers  
 905 is the quantum yield, i.e., QE in Eq. S18, which has a value of 95-97% for our camera in the fluorescence  
 906 detection spectral region (550 – 610 nm). The difference in  $N$  is only  $\sim 3$ -5%, and the effect on the  
 907 localization error  $Err_i$  is even smaller and negligible.

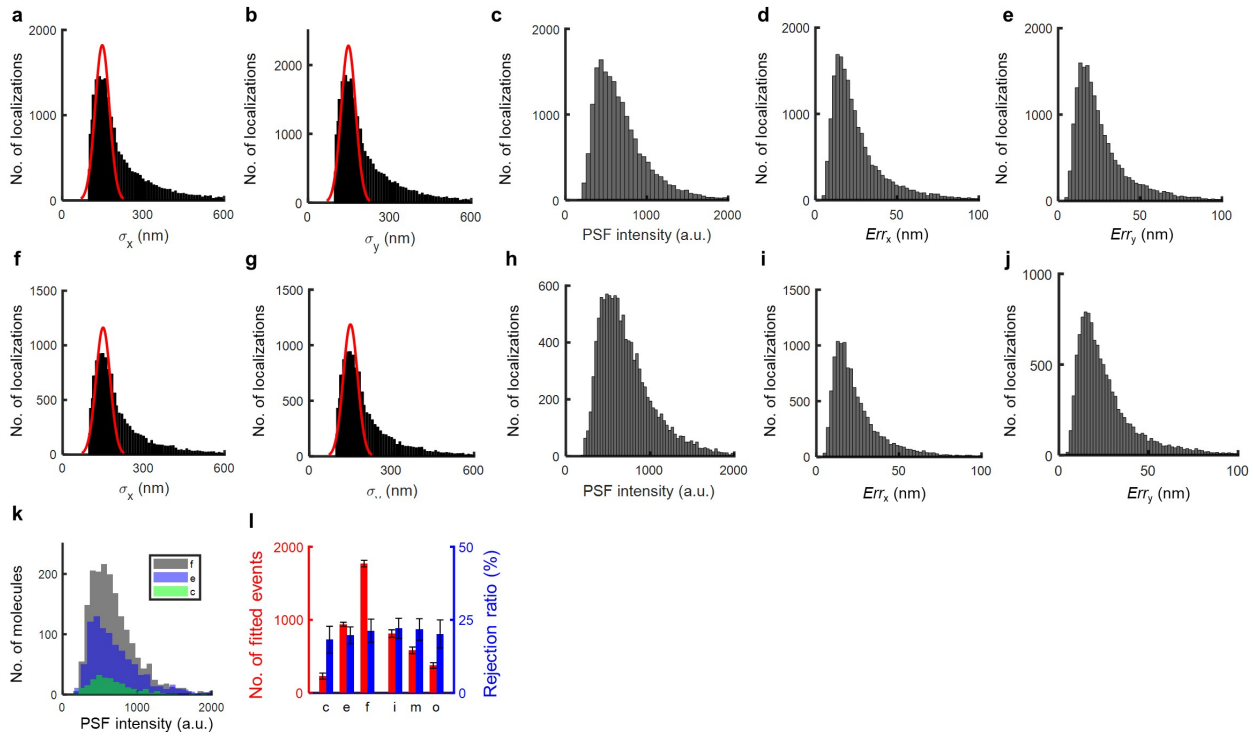

908  
 909 **Supplementary Fig. 5 | Parameters and localization errors of single-molecule fluorescence image analysis.** **a-e**, Distributions  
 910 of  $\sigma_x$  (**a**),  $\sigma_y$  (**b**), PSF intensity (i.e., the volume of the fitted 2D Gaussian function) (**c**),  $Err_x$  (**d**), and  $Err_y$  (**e**) from a Au nanoplate  
 911 in a typical imaging experiment. Red lines are Gaussian fits for the bins in 100-200 nm range in **a-b**, and the fitted averages are  
 912  $148 \pm 26$  nm and  $149 \pm 26$  nm, respectively. The averages of **c-e** are  $690 \pm 342$ ,  $26 \pm 18$  nm, and  $27 \pm 19$  nm, respectively. Errors  
 913 here are s.d. **f-j**, Distributions of parameter as in **a-e** using a pixel-integrated PSF:  
 914  $I(x, y) = A + Bx + Cy + \int_{x-\delta}^{x+\delta} dX \int_{y-\delta}^{y+\delta} dY I_0 \exp\left[-\frac{1}{2}\left(\frac{X-x_0}{\sigma_x}\right)^2 - \frac{1}{2}\left(\frac{Y-y_0}{\sigma_y}\right)^2\right]$ , where  $I(x, y)$  is the intensity counts of the fluorescent  
 915 molecule in the image at position  $(x, y)$ ,  $A+Bx+Cy$  is a sloping plane to account for the background in the fitting,  
 916  $I_0 \exp\left[-\frac{1}{2}\left(\frac{X-x_0}{\sigma_x}\right)^2 - \frac{1}{2}\left(\frac{Y-y_0}{\sigma_y}\right)^2\right]$  is a two-dimensional Gaussian function, and  $\delta$  is half of the pixel size. Along  $x$  or  $y$  axis, the  
 917 integration over each pixel is done numerically by dividing each pixel into 11 equal segments.  $(x_0, y_0)$  gives the center location of  
 918 the PSF (see details in Ref<sup>7,28,29</sup>) instead of Eq. S17:  $\sigma_x$  (**f**),  $\sigma_y$  (**g**), PSF intensity (i.e., the volume of the fitted PSF) (**h**),  $Err_x$  (**i**), and  
 919  $Err_y$  (**j**) from a Au nanoplate in a typical imaging experiment. Red lines are Gaussian fits for the bins in 100-200 nm range in **f-g**,  
 920 and the fitted averages are  $150 \pm 26$  nm and  $151 \pm 26$  nm, respectively. The averages of **h-j** are  $734 \pm 346$ ,  $25 \pm 17$  nm, and  $27 \pm$   
 921  $19$  nm, respectively. Errors here are s.d. The results in **f-j** are similar to those in **a-e**, indicating that the two different PSF forms  
 922 give essentially the same results. **k**, Histograms of PSF intensities of product molecules detected in the corner, edge, and flat facet  
 923 regions, and the averages and s.d. are  $678 \pm 308$  at the corner region,  $710 \pm 354$  at the edge region, and  $689 \pm 323$  at the flat facet  
 924 region. The PSF intensities are essentially the same across the different regions, indicating there is no spatial bias in the detection  
 925 of the products of the fluorogenic auxiliary reaction. **l**, The number of fitted localizations and the overall rejection rates at different

926 regions of nanoplates. Rejections consist of filtering based on  $\sigma_x$  and  $\sigma_y$  (either too small or too big) and diffusing molecules (see  
927 Section 1.8.2). The data show that there is no significant difference in the rejection rate across different regions. Data were averaged  
928 from 55 nanoplates,  $[R] = 0.2 \mu\text{M}$ ,  $[\text{NH}_2\text{OH}] = 1.0 \text{ mM}$ , and no ligand. Error bars are s.e.m.

### 929 Correction for the drift of the stage

930 Each set of titration experiments lasted for a few hours, during which the microscope stage and the  
931 flow cell could drift by hundreds of nanometers. The sample drifting within the same movie, which affected  
932 the localization of centroid positions of the candidate product molecules, was corrected for (see  
933 Supplementary Codes). Both Au nanoplates and nanorods show stable intrinsic emission under 532 nm  
934 irradiation and their positions can be determined by the PSF fitting of their emission, so they can act as  
935 internal position markers in the frames; as the catalysis events are sparse, any contribution of the product  
936 fluorescence on top of a nanoplate/nanorod in a small fraction of image frames is washed out by averaging  
937 over multiple nanoplate/nanorod position markers. The microscope stage drift was monitored in a frame-  
938 by-frame fashion by calculating the intensity-weighted centroid position of the stable intrinsic  
939 photoluminescence of the Au nanoplates and nanorods. The average drift of multiple particles ( $>5$ ) present  
940 in the same movie was used to correct the centroid position of each candidate fluorescent product molecule.  
941 Because the Au nanoplates and nanorods are constantly bright objects, prior to extraction of single-molecule  
942 fluorescence signals from the images, the average emission of Au particles was subtracted. The last 1000  
943 frames of a movie were averaged to generate the average emission image. Each frame in the catalysis  
944 experiment in the presence of fluorogenic reactant was subtracted by the stage-drift-corrected, averaged  
945 emission image. Before the subtraction of the Au nanoplates and nanorods emissions, images to be  
946 subtracted are expanded by 10 times in  $x$  and  $y$  dimensions using the bilinear interpolation method to  
947 accommodate corrections that are subpixel-level stage drifts and, after subtraction, the expanded images  
948 are re-binned to the original image size (i.e., decreasing the image size by 10 times in both  $x$  and  $y$   
949 dimensions).

950 The 5-nm Au nanoparticles are not emissive under 532 nm irradiation, so additional 100-nm Au  
951 nanoparticles that are emissive were added as position markers into the corresponding flow cells. The  
952 positions of at least 5 position markers were averaged for the drift correction in a frame-by-frame manner.

### 953 1.8.2 Quantitative single-molecule counting algorithm to correct for over-counting and underestimation 954 of product molecules

955 The raw candidate product molecules with PSF fitting parameters were filtered by a quantitative  
956 single-molecule counting algorithm, to remove spurious detections and noise contributions, and correct for  
957 unresolved multiple-molecule detections, as well as over-counting due to a product molecule adsorbed on  
958 the nanoparticle for multiple frames (i.e., multi-frame events). A flow chart of the algorithm is given in our  
959 previous study<sup>26</sup>. Briefly, first, the diffraction-limited width of a single-molecule PSF is  $0.61 \times \lambda / \text{NA} =$   
960  $0.61 \times 585 \text{ nm} / 1.2 = 297 \text{ nm}$  (NA is numerical aperture), corresponding to  $\sigma_{x/y} \approx 297 / 2.355 = 126 \text{ nm}$ , so  
961 candidate events with their PSF  $\sigma_x$  or  $\sigma_y$  below 100 nm (coming from ‘hot pixels’) are excluded. Next,  
962 candidate product molecules with a PSF width ranging from 100 nm and to a threshold value ( $\sigma_{\text{thres}}$ , set as  
963 the smaller value of mean  $\sigma_x$  or  $\sigma_y$  plus 2 standard deviations, usually  $\sim 220 \text{ nm}$ ) are selected as single-  
964 molecule events.

965 For those candidate events with their PSF  $\sigma_{x/y}$  greater than  $\sigma_{\text{thres}}$ , if their PSF intensity is greater than  
966 the PSF intensity of a single-molecule event, they were treated as multiple-molecule events, where the  
967 number of molecules was determined by the PSF intensity of the event divided by that of a single-molecule  
968 event and rounded to the nearest integer. Otherwise (i.e., the PSF intensity is less than that of a single-  
969 molecule event), they were treated as molecules that diffused significantly on the catalyst surface (about 5%  
970 of the observed events) and excluded from further analysis.

971 In addition, for two molecules detected in two consecutive frames and the distance between their  
972 centroid locations in these two frames is less than  $2 \times \text{Err}_{\text{OM}}$  ( $\text{Err}_{\text{OM}} = \sqrt{\text{Err}_x^2 + \text{Err}_y^2}$ ,  $\sim 40 \text{ nm}$ , see

973 Supplementary Fig. 5d-e), these two molecules were considered as one product molecule adsorbed on the  
 974 catalyst particle for a time longer than a single frame acquisition time, i.e., a multi-frame event. Thus, only  
 975 the position in the first frame was kept and counted only once to not overestimate the catalytic activity due  
 976 to such multi-frame events (less than 1% of the observed events).

977 Both single-molecule and multiple-molecule events were counted for the calculation of specific  
 978 reaction rates (see Section 1.8.4).

### 979 1.8.3 Overlay of SEM and optical microscopy (OM) images

980 Before analyzing the COMPEITS titration results of single nanoplates or nanorods, the positions  
 981 of the fluorescent catalytic events on each nanoplate or nanorod were mapped onto its structure extracted  
 982 from its SEM image, utilizing a bright field optical microscopy (OM) image (transmission mode) that shares  
 983 the same coordinate system with the fluorescence images (see Supplementary Codes). The procedure is  
 984 similar to our previous work<sup>2</sup> and briefly summarized in Supplementary Fig. 6, with the estimation of errors  
 985 listed in Supplementary Table 1. We did not perform this overlay procedure for the 5-nm Au nanoparticles  
 986 as they are smaller than the ~40 nm overall error.

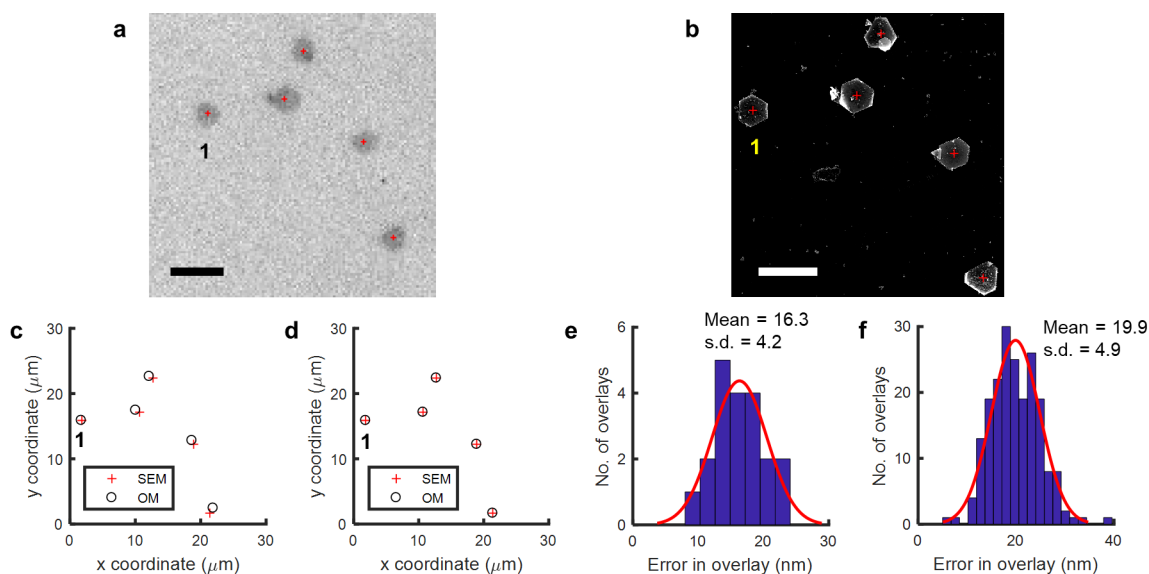

987  
 988 **Supplementary Fig. 6 | Representative procedure of overlaying the centroid positions of Au nanoplates visible in a bright**  
 989 **field optical transmission image and in an SEM image.** **a**, Optical microscopy (OM) image showing the centroid positions of  
 990 the Au nanoplates marked by red crosses, detected from an edge-detection algorithm. **b**, SEM image corresponding to the same  
 991 sample area, also with red crosses showing the centroid positions of the nanoplates, determined from a similar edge-detection  
 992 algorithm. The scale bars are 5  $\mu\text{m}$  in **a** and **b**. **c**, The coordinates of the centroid positions of nanoplates determined from OM as  
 993 well as from SEM, after translating the OM coordinates of Particle 1 to overlap with the SEM counterpart. **d**, The same SEM  
 994 coordinates as in (c), along with the OM coordinates after expansion and rotational operations using Particle 1 as the reference  
 995 position. The expansion and rotational matrix are determined by the average of all pairwise changes in distance and angle. **e**,  
 996 Histogram of the overlay errors from the example sample area shown in **a-d**. **f**, Histogram of the overlay errors from all nanoplates  
 997 analyzed in a flow cell.

998 **Supplementary Table 1 | Estimations of localization errors (using data from nanoplates as examples).**

| Error source         | Super-resolution<br>fluorescence imaging ( $\epsilon_1$ ) | SEM imaging ( $\epsilon_2$ ) | OM-SEM overlay<br>errors ( $\epsilon_3$ ) | Overall errors ( $\epsilon$ )<br>$\epsilon = (\epsilon_1^2 + \epsilon_2^2 + \epsilon_3^2)^{1/2}$ |
|----------------------|-----------------------------------------------------------|------------------------------|-------------------------------------------|--------------------------------------------------------------------------------------------------|
| Estimated error (nm) | 27                                                        | 20                           | 20                                        | 39                                                                                               |

999 1.8.4 Obtaining  $v_R$  for a whole particle or different sub-particle sections

1000 Obtaining  $v_R$  for 5-nm Au nanoparticles

1001 Since the 5-nm Au nanoparticles were not emissive under 532 nm light illumination, they were  
 1002 identified as small areas (e.g.,  $40 \times 40 \text{ nm}^2$ ) with recurring fluorescent bursts that report catalytic reactions  
 1003 as in our previous work<sup>23</sup>. The reaction rate  $v_R$  of a single nanoparticle (in  $\text{s}^{-1} \text{ particle}^{-1}$ ) was calculated from  
 1004 the number of product molecules on a particle divided by the corresponding reaction time.

1005 Obtaining  $v_R$  for Au nanoplates at the sub-particle level

1006 Each nanoplate was dissected into different sections according to its SEM image and the geometric  
 1007 relations outlined below, and the product molecules were grouped into sections based on their positions  
 1008 after transformation onto the same coordinate system of the SEM image of the nanoplate (see  
 1009 Supplementary Codes).

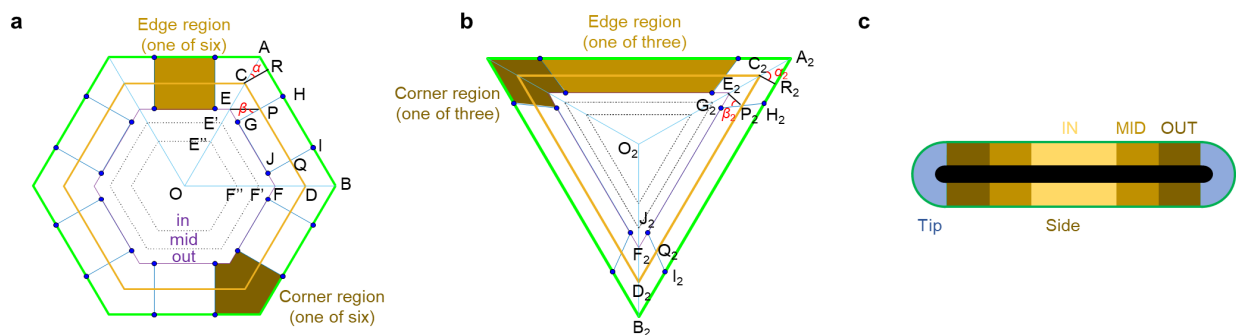

1010  
 1011 **Supplementary Fig. 7 | Schematics of dissecting single hexagonal nanoplates (a), triangular nanoplates (b), and nanorods**  
 1012 **(c).** Relative sizes of each region are not drawn to scale and the exact sizes may differ from one particle to another.

1013 Supplementary Fig. 7a shows the schematics of how each nanoplate is dissected into different  
 1014 sections. The outer edge of the mesoporous silica shell, e.g., AB (green), and the contour of the Au core,  
 1015 e.g., CD (golden), are directly visible from the SEM image (Supplementary Fig. 1c, Supplementary Fig.  
 1016 6b). Therefore, the coordinates of vertices such as A, B, C, and D are obtained from the edge detection  
 1017 algorithm for each nanoplate. Let CR be perpendicular to AB; then the length of CR, which is the thickness  
 1018 ( $t$ ) of the mSiO<sub>2</sub> shell, can be measured for individual nanoplates. Point O is the geometric center, and E  
 1019 and F are points on OC and OD, respectively, where  $CE = DF \equiv 3\varepsilon$ , where  $\varepsilon$  is the overall localization error  
 1020 of the correlated SEM-fluorescence imaging method. The value of  $\varepsilon$  is about 40 nm in this work (see  
 1021 Supplementary Table 1). Therefore, the area enclosed by the purple lines including EF define the flat facet  
 1022 region. Points P and Q are on CD, where  $CP = DQ = 3\varepsilon$ . GH and IJ are perpendicular to CD, and GHIJ  
 1023 (such as the area highlighted in dark yellow) defines one of the edge regions. Regions outside the flat facet  
 1024 and the edge regions are the corner regions (such as the area highlighted in dark brown). The boundaries of  
 1025 the corner, edge, and flat facet regions, which are needed to sort product molecules and for the calculation  
 1026 of surface area, can be expressed based on these known coordinates in addition to  $\varepsilon$  in the following way.

1027 From  $\vec{CE} = \frac{|CE|}{|CO|} \vec{CO}$ ,  $x_E = \frac{3\varepsilon}{|CO|} (x_O - x_C) + x_C$ , in which all quantities are known. Similarly,  $y_E, x_F,$   
 1028 and  $y_F$  can be solved. We also get  $x_H = \frac{|AH|}{|AB|} (x_B - x_A) + x_A$ ,  $x_I = \frac{|AH|}{|AB|} (x_A - x_B) + x_B$  (note  $|AH| = |IB|$ ),  
 1029  $x_J = \frac{|EG|}{|EF|} (x_E - x_F) + x_F$  (note  $|EG| = |JF|$ ),  $x_G = \frac{|EG|}{|EF|} (x_F - x_E) + x_E$ , where  $|AH| = |AR| + |RH| =$   
 1030  $|AC| \times \sin(\alpha) + 3\varepsilon$ ;  $|EG| = |EP| \times \sin(\beta)$ . All the y coordinates can be expressed in the y counterparts.

1031 For equilateral hexagons,  $\alpha = \beta = \pi/6$ ,  $|EP| = |CE| = 3\varepsilon$ ; and these values are used for all other  
 1032 nanoplates as an approximation. The extreme variation from a hexagonal shape for the nanoplates is the  
 1033 equilateral triangular shape. The coordinates of boundaries established on the equilateral hexagon (i.e.,  $\alpha =$   
 1034  $\beta = \pi/6$ ) can also dissect an equilateral triangle into the corner regions, edge regions, and the flat facet

1035 reasonably well (Supplementary Fig. 7b), although the corresponding values of  $\alpha_2$  and  $\beta_2$  differ from  $\pi/6$ .  
1036 In this case,  $G_2H_2$  and  $I_2J_2$  are no longer perpendicular to  $C_2D_2$ , but  $G_2H_2I_2J_2$  (such as the area highlighted  
1037 in dark yellow) is still a satisfactory representation of the edge region. Therefore, it is practicable to apply  
1038 these definitions of nanoplate dissection to all nanoplates.

1039 The flat facet region of each nanoplate is further divided into three sections, i.e., inner, middle,  
1040 outer, with equal surface areas, separated in dotted lines (e.g.,  $E''F''$  and  $E'F'$ , where  $|OF''|:|OF'|:|OF| =$   
1041  $\sqrt{1/3}:\sqrt{2/3}:1$ ). Specific activities in each section were obtained accordingly.

1042 After assigning the product molecules into different regions,  $v_R$  (in  $s^{-1} \mu m^{-2}$ ) was calculated as the  
1043 number of product molecules divided by reaction time, then divided by the surface area of the region. The  
1044 surface area used in these calculations were of the 3D nanoplates instead of the 2D projection. To be specific,  
1045 both the top and bottom areas were counted for the flat facet, and the edge region consisted of the side plane  
1046 (approximated to be vertical to the basal plane, not seen in the 2D projection) and the parts from the top or  
1047 bottom basal planes. Note the bottom side of the flat facets faces the supporting quartz slide; the inclusion  
1048 of this bottom side or not in calculating the catalytic surface area only affects the absolute value of the  
1049 measured specific turnover rate, but does not affect its dependences on the concentrations of the reactant or  
1050 the competitor and therefore does not affect the value of determined adsorption equilibrium constants.

#### 1051 Obtaining $v_R$ for Au nanorods at the sub-particle level

1052 The structural contour of each nanorod was first estimated in SEM image from the edge detection  
1053 function, then fitted by a rectangle fused with two semicircles at the two short sides (Supplementary Fig.  
1054 7b, see Supplementary Codes)<sup>7</sup>. The rectangle was defined as the side region, while the two semicircles  
1055 were defined as the tip regions. The side region is further divided into three sections with equal areas, i.e.,  
1056 IN, MID, OUT. Similarly,  $v_R$  (in  $s^{-1} \mu m^{-2}$ ) was calculated as the number of product molecules divided by  
1057 reaction time, then divided by the surface area of the region. The surface area also considered the 3D  
1058 geometry, i.e., two hemisphere for the tip region and cylinder for the side region.

### 1059 **1.9 Facet-controlled synthesis of colloidal Au nanoparticles in the presence of increasing [CTAB]** 1060 **and their SEM characterization: transition from irregular-shaped nanoparticles to high-** 1061 **quality nanoplates**

1062 Au nanoparticles were synthesized via reduction of  $HAuCl_4$  by ascorbic acid in the presence of  
1063 various [CTAB] in aqueous solution, modified from an earlier protocol<sup>30</sup> (see Methods). Supplementary  
1064 Fig. 8 shows the larger-area SEM images of Au nanoparticles synthesized at increasing [CTAB], indicating  
1065 gradual progression from irregular-shaped nanoparticles to a mixture of irregular nanoparticles and  
1066 nanoplates and further to high-quality nanoplates; the corresponding CVs of Pb UPD are described in the  
1067 main text (Fig. 4d-i).

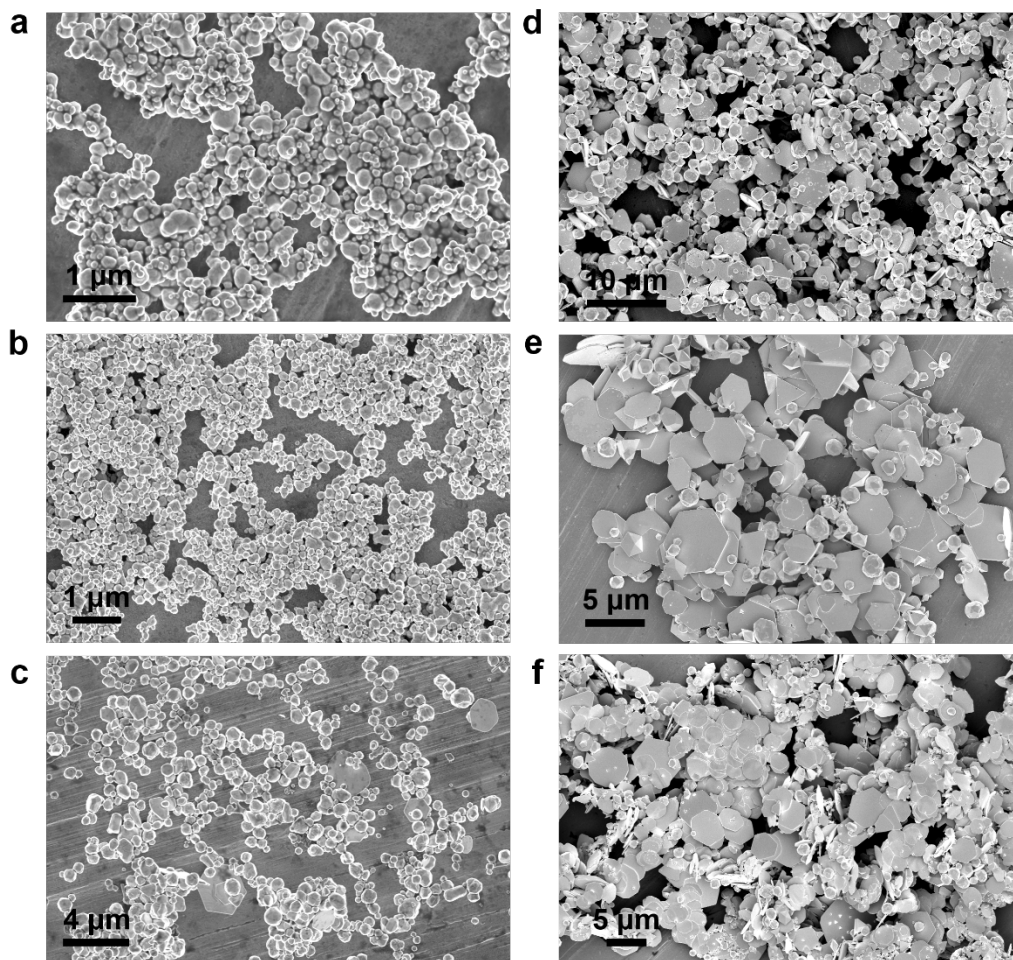

1068  
 1069 **Supplementary Fig. 8 | SEM images showing a large area of the Au nanoparticles synthesized at various concentrations of**  
 1070 **CTAB: 0.26 mM (a), 0.52 mM (b), 1.04 mM (c), 1.56 mM (d), 2.34 mM (e), and 3.12 mM (f)** (Supplementary Information section  
 1071 1.9). The transition from irregular nanoparticles to nanoplates supports the increasing proportion of {111} facets on the particle  
 1072 surfaces in the samples.

1073 **2 Supplementary bulk reaction titration confirms: (1) CTAB/CTAOH/CTAC adsorb with positive**  
 1074 **cooperativity; (2) PVPs adsorb with negative cooperativity; (3) I<sup>-</sup>/Br<sup>-</sup>/BME adsorb non-**  
 1075 **cooperatively; (4) monomeric VP, EtOH, and K<sup>+</sup> have negligible adsorption; (5) [NH<sub>2</sub>OH] is**  
 1076 **saturated for the fluorogenic reaction kinetics**

1077 The titration results summarized in Supplementary Fig. 9 and Supplementary Table 2a confirmed  
 1078 that many ligands (Supplementary Fig. 9a-i) could indeed suppress the reaction rate of 5-nm Au-  
 1079 nanoparticle catalyzed reduction of resazurin to resorufin by NH<sub>2</sub>OH, while some could not (Supplementary  
 1080 Fig. 9j-l). Among the ligands studied, CTAB, CTAOH, and CTAC showed positive adsorption  
 1081 cooperativity, PVP of different molecular weights showed negative cooperativity, and BME, I<sup>-</sup>, and Br<sup>-</sup>  
 1082 showed no cooperativity. These results laid the foundations of single-molecule experiments.

1083 Titration of VP (Supplementary Fig. 9j) and EtOH (Supplementary Fig. 9k) showed no apparent  
 1084 suppression of the fluorogenic reaction rate, indicating that they do not have significant adsorption on Au  
 1085 nanoparticles in the concentration range studied under the measurement conditions.

1086 To ensure the slightly basic pH condition during the titration, 7 mM phosphate (mixture of K<sub>2</sub>HPO<sub>4</sub>  
 1087 and KH<sub>2</sub>PO<sub>4</sub>) was used to maintain pH 7.4. Changing the phosphate buffer concentration from 7 mM to 3.5  
 1088 mM or 14 mM did not change the rate of the fluorogenic reaction rate  $v_R$  without or with ligands



1089 (Supplementary Fig. 9l). Therefore, millimolar potassium and phosphate ions show negligible adsorption  
 1090 on the Au particles. The adsorption of KI or KBr is attributable to  $I^-$ , or  $Br^-$ , where the adsorption of  
 1091 potassium is minimal.

1092 Control experiments under the COMPEITS conditions and under various  $[NH_2OH]$  (in the presence  
 1093 of CTAB, Supplementary Fig. 9m) show that the reaction rate stays unchanged, which confirms that the  
 1094 concentration of  $NH_2OH$  was indeed in excess (i.e., kinetically saturated) and CTAB-adsorption-induced  
 1095 suppression of the fluorogenic reaction rate is due to competition with the reactant resazurin not the co-  
 1096 reactant  $NH_2OH$ .

1097 The different values of  $K_R$  measured across different ligands could be attributed to different  
 1098 conditions of the nanoparticles used (i.e., different batches, freshness, extent of mixing in the cuvette), while  
 1099  $k_R$  is further affected by the amount of nanoparticles used.

1100

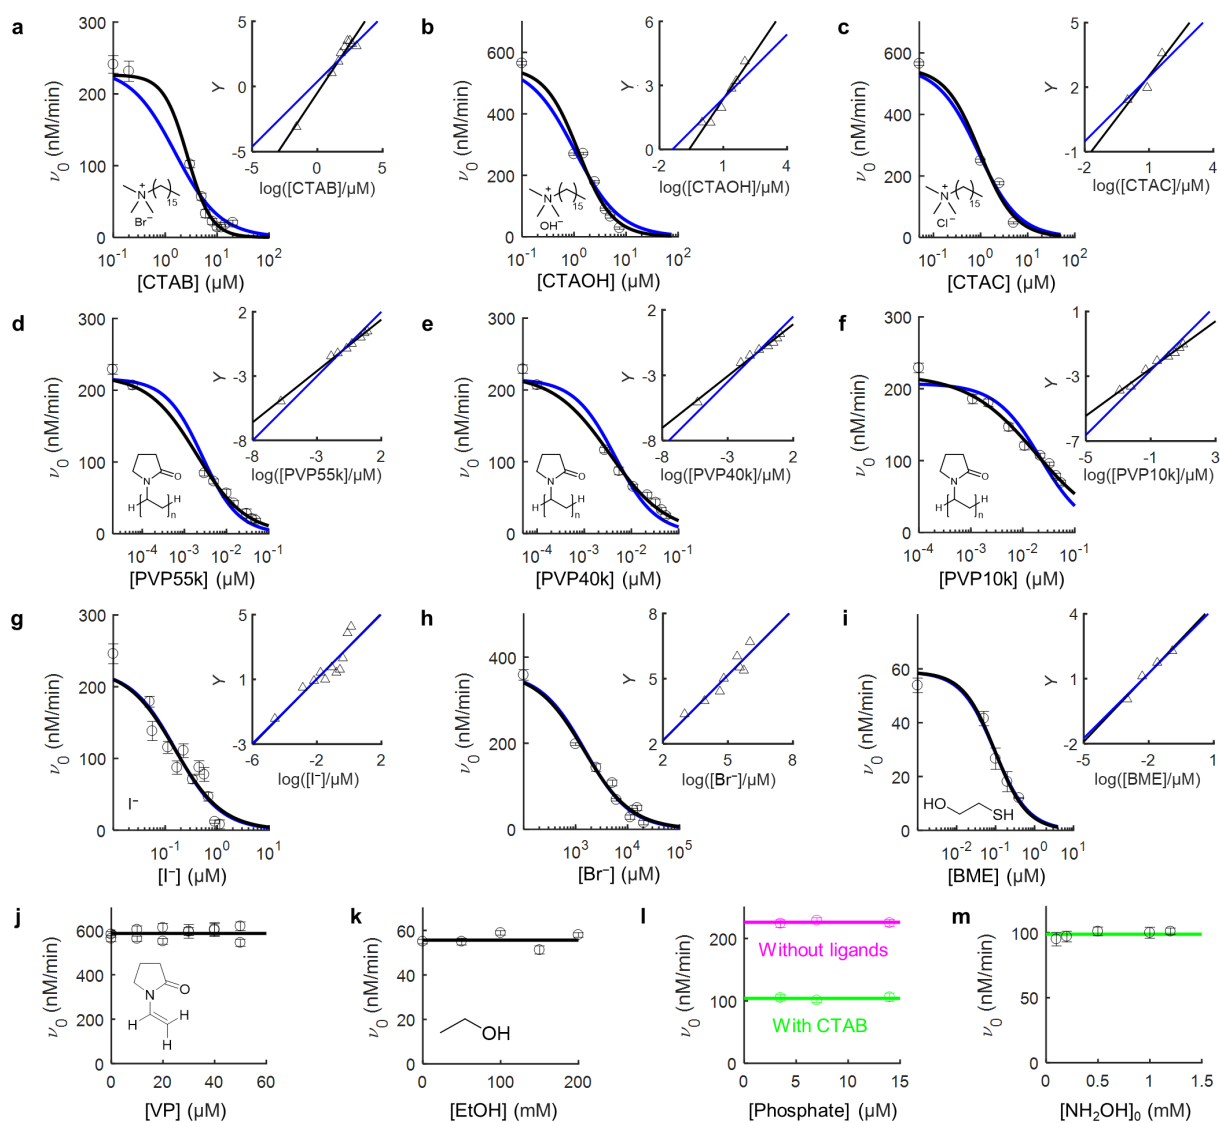

1101  
 1102 **Supplementary Fig. 9 | Bulk initial reaction rate  $\nu_0$  of 5-nm Au-nanoparticle catalyzed reduction of resazurin to resorufin**  
 1103 **by  $NH_2OH$  in the presence of competing ligands at different concentrations  $[L]$**  (Supplementary Information sections 2). a-k,  
 1104 Ligands CTAB (a), CTAOH (b), CTAC (c), PVP55k (d), PVP40k (e), PVP10k (f),  $I^-$  (g),  $Br^-$  (h), BME (i), VP (j), and ethanol  
 1105 (k). Data points at  $[L] = 0$  are placed on the y-axes manually. Typically,  $[R]_0 = 1.0 \sim 10 \mu M$ ;  $[NH_2OH]_0 = 1.0 \text{ mM}$ ;  $[Au \text{ nanoparticle}]$

1106 = 0.010 ~ 0.10 nM (based on particles instead of atoms), in 7 mM pH 7.4 phosphate buffer, and the conditions for different points  
 1107 within a panel is the same except the ligand concentration. Black lines: fits with Eq. S11; blue lines: fits with Eq. S11 where  $h$  is  
 1108 fixed to 1; insets: the corresponding Hill plots following Eq. S14. The fitting parameters of **a-i** are summarized in Supplementary  
 1109 Table 2a. **l**, Control experiments at different [phosphate]. **m**, Control experiments with various  $[\text{NH}_2\text{OH}]_0$  in the presence of 3  $\mu\text{M}$   
 1110 CTAB as one point in **a**. Solid line in **l-m**: the average  $v_0$  to guide the eye.

1111 **Supplementary Table 2 | Summary of fitting parameters of bulk titration curves of 5-nm Au nanoparticles shown in**  
 1112 **Supplementary Fig. 9 (a) and summary of parameters extracted from single 5-nm Au nanoparticle titration curves shown**  
 1113 **in Supplementary Fig. 12(b).** Errors in **a** are s.d. estimated from fitting; values in **b** are the mean and s.e.m. of the fitting parameters  
 1114 from all the nanoparticles analyzed. Note that the values in **b** are the averages of fitting results of individual particles, so they can  
 1115 be different from values of the black curve in Fig. 1e, which are fits of the average rate.

**a. Fitting parameters of bulk ligand competition titration curves on 5-nm Au nanoparticles (Supplementary Information section 2)**

| Ligand                    | $K_L$ ( $\text{M}^{-1}$ )   | $h$               | $K_R$ ( $\mu\text{M}^{-1}$ ) | $k_R$ ( $\mu\text{M min}^{-1}$ ) |
|---------------------------|-----------------------------|-------------------|------------------------------|----------------------------------|
| CTAB                      | $6.0 \pm 1.2 (\times 10^5)$ | $1.8 \pm 0.4$     | $1.3 \pm 0.7$                | $0.49 \pm 0.15$                  |
| CTAOH                     | $2.2 \pm 0.7 (\times 10^6)$ | $1.3 \pm 0.2$     | $6.1 \pm 1.7$                | $0.77 \pm 0.07$                  |
| CTAC                      | $3.5 \pm 1.1 (\times 10^6)$ | $1.2 \pm 0.1$     | $6.0 \pm 1.0$                | $0.78 \pm 0.09$                  |
| PVP55k                    | $2.5 \pm 0.8 (\times 10^9)$ | $0.81 \pm 0.11$   | $2.4 \pm 0.6$                | $0.34 \pm 0.04$                  |
| PVP40k                    | $1.6 \pm 0.8 (\times 10^9)$ | $0.71 \pm 0.09$   | $2.4 \pm 0.6$                | $0.34 \pm 0.03$                  |
| PVP10k                    | $4.2 \pm 1.4 (\times 10^8)$ | $0.63 \pm 0.07$   | $2.5 \pm 0.6$                | $0.34 \pm 0.03$                  |
| $\Gamma^a$                | $2.1 \pm 0.8 (\times 10^7)$ | $0.9 \pm 0.2$     | $2.1 \pm 1.0$                | $0.37 \pm 0.08$                  |
| $\Gamma$ ( $h = 1$ )      | $1.8 \pm 0.5 (\times 10^7)$ | 1                 | $2.4 \pm 1.1$                | $0.34 \pm 0.07$                  |
| $\text{Br}^-^a$           | $1.6 \pm 0.6 (\times 10^3)$ | $1.0 \pm 0.2$     | $1.1 \pm 0.6$                | $0.80 \pm 0.25$                  |
| $\text{Br}^-$ ( $h = 1$ ) | $1.5 \pm 0.3 (\times 10^3)$ | 1                 | $1.1 \pm 0.5$                | $0.78 \pm 0.23$                  |
| BME <sup>a</sup>          | $3.2 \pm 0.7 (\times 10^7)$ | $1.1 \pm 0.2$     | $2.1 \pm 0.5$                | $0.10 \pm 0.01$                  |
| BME ( $h = 1$ )           | $3.5 \pm 0.5 (\times 10^7)$ | 1                 | $2.1 \pm 0.5$                | $0.10 \pm 0.01$                  |
| VP                        | n.d. <sup>b</sup>           | n.d. <sup>b</sup> | n.d. <sup>b</sup>            | n.d. <sup>b</sup>                |
| EtOH                      | n.d. <sup>b</sup>           | n.d. <sup>b</sup> | n.d. <sup>b</sup>            | n.d. <sup>b</sup>                |

1116

**b. Fitting parameters of single 5-nm Au-nanoparticle COMPEITS titrations averaged over many particles (Supplementary Information section 3.4)**

| Ligand                    | No. of nanoparticles | $K_L$ ( $\text{M}^{-1}$ )   | $h$             | $K_R$ ( $\mu\text{M}^{-1}$ ) | $k_R$ ( $\text{s}^{-1} \text{particle}^{-1}$ ) |
|---------------------------|----------------------|-----------------------------|-----------------|------------------------------|------------------------------------------------|
| CTAB                      | 50                   | $6.6 \pm 0.2 (\times 10^5)$ | $2.0 \pm 0.1$   | $7.6 \pm 0.4$                | $0.39 \pm 0.08$                                |
| CTAOH                     | 43                   | $2.2 \pm 0.1 (\times 10^6)$ | $1.3 \pm 0.1$   | $7.9 \pm 0.3$                | $0.37 \pm 0.04$                                |
| CTAC                      | 47                   | $4.7 \pm 0.1 (\times 10^6)$ | $1.1 \pm 0.1$   | $7.7 \pm 0.2$                | $0.37 \pm 0.03$                                |
| PVP55k                    | 36                   | $2.0 \pm 0.2 (\times 10^9)$ | $0.75 \pm 0.03$ | $8.3 \pm 0.3$                | $0.36 \pm 0.04$                                |
| PVP40k                    | 42                   | $1.4 \pm 0.1 (\times 10^9)$ | $0.68 \pm 0.02$ | $8.0 \pm 0.2$                | $0.36 \pm 0.03$                                |
| PVP10k                    | 33                   | $2.9 \pm 0.3 (\times 10^8)$ | $0.64 \pm 0.02$ | $8.5 \pm 0.3$                | $0.35 \pm 0.04$                                |
| $\Gamma^a$                | 44                   | $2.1 \pm 0.8 (\times 10^7)$ | $0.9 \pm 0.2$   | $8.7 \pm 0.4$                | $0.36 \pm 0.05$                                |
| $\Gamma$ ( $h = 1$ )      | 44                   | $1.8 \pm 0.5 (\times 10^7)$ | 1               | $8.0 \pm 0.3$                | $0.37 \pm 0.05$                                |
| $\text{Br}^-^a$           | 39                   | $1.3 \pm 0.6 (\times 10^3)$ | $1.0 \pm 0.1$   | $8.0 \pm 0.4$                | $0.38 \pm 0.07$                                |
| $\text{Br}^-$ ( $h = 1$ ) | 39                   | $1.2 \pm 0.3 (\times 10^3)$ | 1               | $7.8 \pm 0.4$                | $0.38 \pm 0.06$                                |
| BME <sup>a</sup>          | 40                   | $2.4 \pm 0.1 (\times 10^7)$ | $1.0 \pm 0.1$   | $8.2 \pm 0.3$                | $0.36 \pm 0.03$                                |
| BME ( $h = 1$ )           | 40                   | $2.6 \pm 0.1 (\times 10^7)$ | 1               | $8.1 \pm 0.3$                | $0.36 \pm 0.03$                                |

1117 <sup>a</sup> The fitted  $h$  values of these ligands were equal to 1 within error, so the  $h$  was then fixed to 1 for these ligands to obtain  $K_L$  more  
 1118 accurately. <sup>b</sup> n.d., not determined.

### 1119 **3 Supplementary results of single-molecule reaction imaging and COMPEITS imaging of single** 1120 **5-nm Au nanoparticles**

#### 1121 **3.1 Super-resolution images of fluorogenic auxiliary reaction and COMPEITS images of ligand** 1122 **adsorption**

1123 Motivated by the bulk experiments, we moved on to single-molecule imaging of catalytic reactions  
 1124 on 5-nm Au nanoparticles first, with concentration titrations of the fluorogenic reactant and the competing  
 1125 ligands. We optimized the amount of 5-nm Au nanoparticles to be drop casted onto the quartz slide of the  
 1126 flow cell to have low density and ensure minimal clustering of particles. For rare occurrences of particle



1127 clustering that are not resolvable at  $\sim 10$  nm resolution, the measured affinity and cooperativity are the  
 1128 averages of the clustered particles.

1129 Supplementary Fig. 10a shows a segment of a typical fluorescence trajectory of a single 5-nm Au  
 1130 nanoparticle catalyzing the fluorogenic auxiliary reduction reaction of resazurin; each fluorescent burst  
 1131 represents the formation of one product molecule resorufin and its subsequent desorption from the  
 1132 nanoparticle surface. In the absence of CTAB, the localized positions of individual reaction products on a  
 1133 single 5-nm particle span a region of  $\sim 10$  nm in size (Supplementary Fig. 10b), the effective spatial  
 1134 resolution of our imaging technique — note this resolution depends on the localization accuracy of  
 1135 individual molecules (see Eq. S19), which in turn depends on the S/N ratio of fluorescence detection and  
 1136 thus on the particular imaging experiment of different catalyst particles; the typically resolution is about  
 1137 10-40 nm. Upon adding CTAB, the number of detected products ( $n$ ) of the fluorogenic auxiliary reaction  
 1138 decreases, reflecting CTAB competition with resazurin adsorption on the particle (Supplementary Fig. 10c).

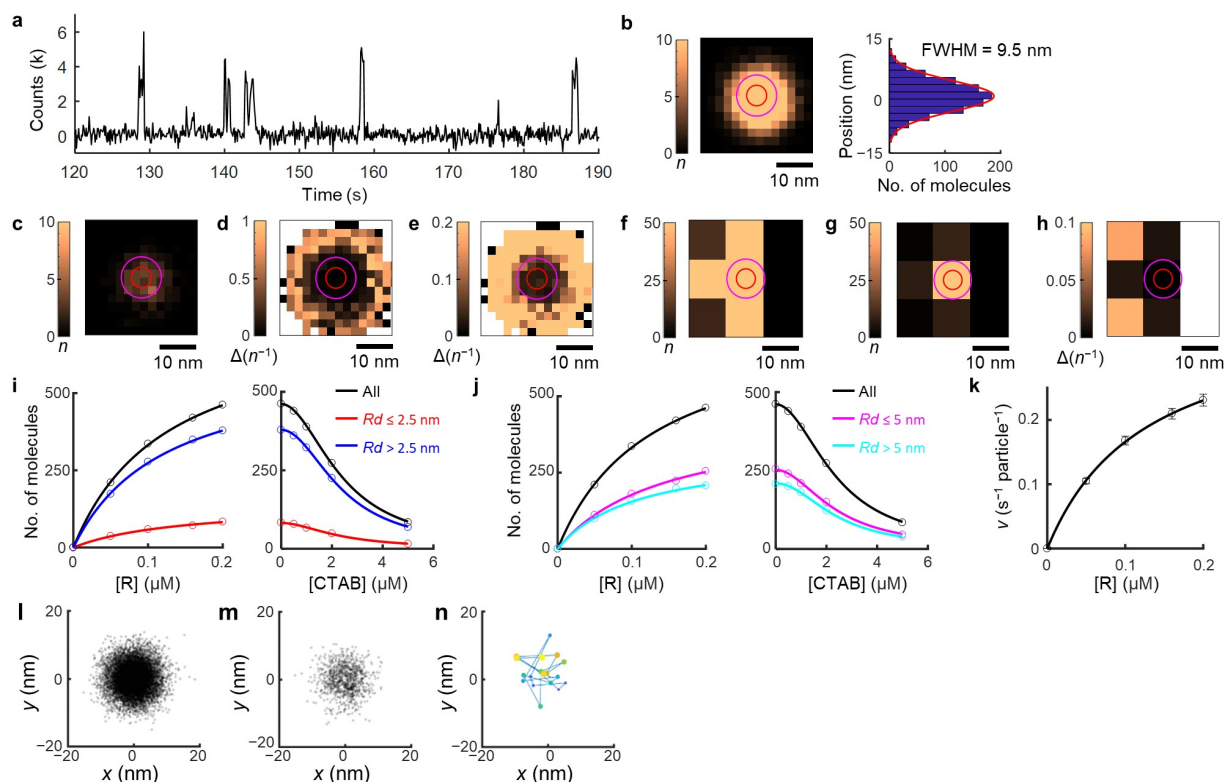

1139 **Supplementary Fig. 10 | COMPEITS images and titrations of ligand adsorption on single 5-nm Au nanoparticles.** **a**, A  
 1140 segment of an exemplary fluorescence intensity vs. time trajectory on a single 5-nm Au nanoparticle. **b-c**, 2D histograms of the  
 1141 fluorogenic auxiliary reaction product molecules on a single 5-nm Au nanoparticle detected over 90 min without (**b**) and with 5  
 1142  $\mu\text{M}$  CTAB (**c**).  $[\text{R}] = 200$  nM,  $[\text{NH}_2\text{OH}] = 1$  mM. Pixel size:  $2 \times 2$  nm<sup>2</sup>. All scale bars are 10 nm. Right in **b**: 1D histogram in the  
 1143  $y$  direction; FWHM is 9.5 nm, showing the spatial resolution here is  $\sim 10$  nm. **d**, The COMPEITS image derived from (**b**) and (**c**).  
 1144  $n$ : number of fluorogenic probe reaction products detected over 90 min.  $\Delta(n^{-1}) \propto \Delta(v^{-1}) \propto K_L^h$  based on Eq. (1) and Eq. S13. **e**,  
 1145 Same as **d**, with the color scale adjusted to focus on smaller values. Red line: estimated structural contour of the 5-nm Au  
 1146 nanoparticle, where the center is estimated from the center of Gaussian fittings of the spatial distribution of product molecules.  
 1147 Magenta line: a circle with a diameter of 10 nm, the rounded full-width-at-half-maximum of the Gaussian distribution of product  
 1148 molecules. **f-h**, Same images corresponding to **b-d**, with pixel size  $10 \times 10$  nm<sup>2</sup>. COMPEITS images: white/null pixels represent  
 1149 occasional negative values or infinities due to  $1/0$  calculations. **i**, The titration of product molecules with different concentrations  
 1150 of R (left) and CTAB (right) within the whole area (black), the subset within the contour of the 5-nm Au nanoparticle (red) and the  
 1151 subset outside (blue). The fitted  $K_{\text{CTAB}}$  are  $0.68 \pm 0.01$ ,  $0.68 \pm 0.05$ , and  $0.68 \pm 0.02$   $\mu\text{M}^{-1}$ , respectively; and the fitted  $h$  are  $2.0 \pm$   
 1152  $0.1$ ,  $1.9 \pm 0.2$ , and  $2.0 \pm 0.1$ , respectively. **j**, Similar to **i**, but separating the subset within the contour of a circle of 10 nm  
 1153 diameter (magenta) and the subset outside (cyan). The fitted  $K_{\text{CTAB}}$  are  $0.66 \pm 0.03$  and  $0.70 \pm 0.03$   $\mu\text{M}^{-1}$ , respectively; and the fitted  $h$  are  
 1154  $1.9 \pm 0.1$  and  $2.0 \pm 0.1$ , respectively.  $R_d$  is the radius of the red (**i**) or the magenta (**j**) circle. **k**, Single-particle titration of auxiliary  
 1155 reaction rate  $v_{\text{R}}$  vs.  $[\text{R}]$  averaged over 50 particles, each of which was later titrated in  $[\text{CTAB}]$  as shown in Fig. 1b. Black line: fits  
 1156

1157 with Eq. S15, where  $k_R = 0.39 \pm 0.08 \text{ s}^{-1} \text{ particle}^{-1}$ ,  $K_R = 7.6 \pm 0.4 \text{ }\mu\text{M}^{-1}$  (also in Supplementary Table 2b). **1-m**, Scatter plots of  
1158 molecular localizations corresponding to **b-c**. **n**, Distribution of localizations for a product molecule lasting for 19 frames on a 5-  
1159 nm Au nanoparticle, with the size of the symbol marker increasing with the frame index.

1160 A COMPEITS image is generated by the inverse subtraction of two super-resolution fluorescence  
1161 localization images, where the value of each pixel is calculated as  $\Delta(n^{-1}) = 1/n_2 - 1/n_1$ , where the subscript  
1162 1 and 2 represents the images with zero and a certain [L] (>0), respectively. Note the pixels of each of these  
1163 two original image ( $n_1$  or  $n_2$ ) store the counts of fluorescent products generated in the corresponding space  
1164 over the same period of time, e.g., 15 min. As  $\Delta(n^{-1}) \propto \Delta(v^{-1}) \propto K_L^h$  based on Eq. (1) and Eq. S13, one can  
1165 visualize directly the differences in  $K_L^h$  spatially in such COMPEITS images.

1166 Although COMPEITS images could be generated for 5-nm Au nanoparticles in the same way as  
1167 for nanoplates and nanorods, they are less informative. The main reason is that the physical size of the  
1168 particles is smaller than the  $\sim 10$  nm resolution here of the single-molecule super-resolution imaging. Using  
1169  $10 \times 10 \text{ nm}^2$  or bigger bin sizes in the COMPEITS image gives no meaningful geometric information  
1170 regarding distribution of adsorption affinity with respect to the structural contour of the particle  
1171 (Supplementary Fig. 10f-h). Using bin sizes smaller than 5 nm was possible, e.g.,  $2 \times 2 \text{ nm}^2$  bins could  
1172 present the 2D distributions of the product molecules clearly (Supplementary Fig. 10b-c). However, a  
1173 misleading ring pattern would show up outside the structural contour of the 5-nm nanoparticle  
1174 (Supplementary Fig. 10d-e). Fitting the  $n$ -vs-[L] curves for molecules inside the structural contour or  
1175 outside gives comparable  $K$  and  $h$  values, and the conclusion holds when fitting the  $n$ -vs-[L] curves for  
1176 molecules inside a circle with 10 nm diameter or outside (Supplementary Fig. 10i-j). Thus, the variation of  
1177 affinity suggested by the ring pattern in the COMPEITS image is not valid. This ring pattern is an artifact  
1178 resulting from the mathematical manifestation of the noise level away from the contour of the nanoparticle.  
1179 The  $n_2$  values could be small (e.g., 1 or 2) for pixels away from the nanoparticle (because there is no  
1180 fluorogenic catalytic reaction occurring) and thus lead to large values of  $\Delta(n^{-1}) (= 1/n_2 - 1/n_1)$ , i.e., over 0.5.  
1181 This artifact does not affect the utility of COMPEITS images for the nanorods and nanoplates, as in those  
1182 cases we compare  $\Delta(n^{-1})$  for different regions within their structural contour and their sizes are much larger  
1183 than the  $\sim 10$ -40 nm imaging resolution.

1184 We can use the ratio of standard deviation and the mean, defined as the heterogeneity index (HI),  
1185 to evaluate the spreading of data from individual particles. For CTAB adsorption on 50 of 5-nm Au  
1186 nanoparticles (Fig. 1i), HI for the affinity  $K$  is  $0.12/0.66 = 18\%$ ; and HI for the Hill coefficient  $h$  is  $0.44/2.07$   
1187  $= 21\%$ . The heterogeneity can be in part attributed to the heterogeneity of particle size: the diameter of the  
1188 nominal 5-nm particles from TEM is  $6.0 \pm 1.6 \text{ nm}$ ,<sup>23</sup> where the HI is 27%.

### 1189 **3.2 Possible residual citrate in solution does not affect the results from 5-nm Au nanoparticles**

1190 A trace amount of citrate may exist in the solution of the commercial 5-nm Au nanoparticles we  
1191 used. For the single-particle titration experiments performed in a flow cell, the citrate is expected to be  
1192 washed away by the flow solution, and therefore would not affect the measurement of the target ligand. As  
1193 the results from bulk titration (Supplementary Table 2a) and that from single-particle titration  
1194 (Supplementary Table 2b) are comparable, the role of citrate should be minimal.

1195 To be more stringent, we estimated the concentration of citrate in our bulk reaction mixture and  
1196 tested its effect. Assuming the citrate concentration in the Au nanoparticle solution is at the upper limit of  
1197 'a trace amount', i.e.,  $\sim 100$  parts per million, which is roughly  $0.1 \text{ g/L}$  or  $\sim 0.1 \text{ mM}$ . In a typical bulk titration  
1198 experiment, the nanoparticle solution is diluted by  $\sim 100$  fold in the reaction mixture, corresponding to a  
1199 concentration in the order of  $1 \text{ }\mu\text{M}$ . Titration with additionally added citrate up to  $10 \text{ }\mu\text{M}$ , i.e., 10 times  
1200 higher, only led to  $<10\%$  change of the reaction rate (Supplementary Fig. 11). Consequently, it is safe to  
1201 conclude that the role of citrate is negligible in the bulk titration.

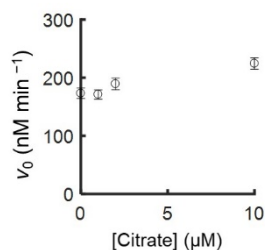

1202  
 1203 **Supplementary Fig. 11 | Citrate shows negligible effect in bulk titration using 5-nm Au nanoparticles.** The data were collected  
 1204 at  $[R]_0 = 10 \mu\text{M}$ ,  $[\text{NH}_2\text{OH}]_0 = 1.0 \text{ mM}$ ,  $[\text{Au nanoparticle}] = 0.01 \text{ nM}$  in 7 mM pH 7.4 phosphate buffer.

1205 **3.3 Decrease of reaction rates during COMPEITS titration is not due to catalyst deactivation**

1206 One might question whether the decrease of the reaction rates during COMPEITS titration  
 1207 experiments is due to catalyst deactivation over time instead of ligand competition. Our previous work  
 1208 showed that 6-nm pseudospherical Au nanoparticles (named so for their actual size, but is the same product  
 1209 as the 5-nm Au NPs used in this work) showed stable activity over the reduction of R for at least 3-4 h<sup>23</sup>,  
 1210 and that Au nanorods were stable for at least 6 h<sup>7</sup>. Here, we verified that Au nanoplates were stable for at  
 1211 least 4 hours (Section 4.2). Therefore, we confirmed that the decrease of reaction rates during COMPEITS  
 1212 titration is not due to catalyst deactivation for all the morphologies of nanoparticles we studied in this work.

1213 **3.4 Ligand adsorption titration curves: adsorption affinity and (non)cooperativity of**  
 1214 **CTAB/CTAOH/CTAC, PVPs, halides, and thiol**

1215 Titration plots of single 5-nm Au nanoparticles from single-molecule fluorescence microscopy of  
 1216 the fluorogenic auxiliary reaction in the presence of increasing competing ligand concentrations are  
 1217 summarized in Supplementary Fig. 12 and Supplementary Table 2b. The obtained  $K_L$  and  $h$  values are  
 1218 consistent with the bulk titration data in Section 2.

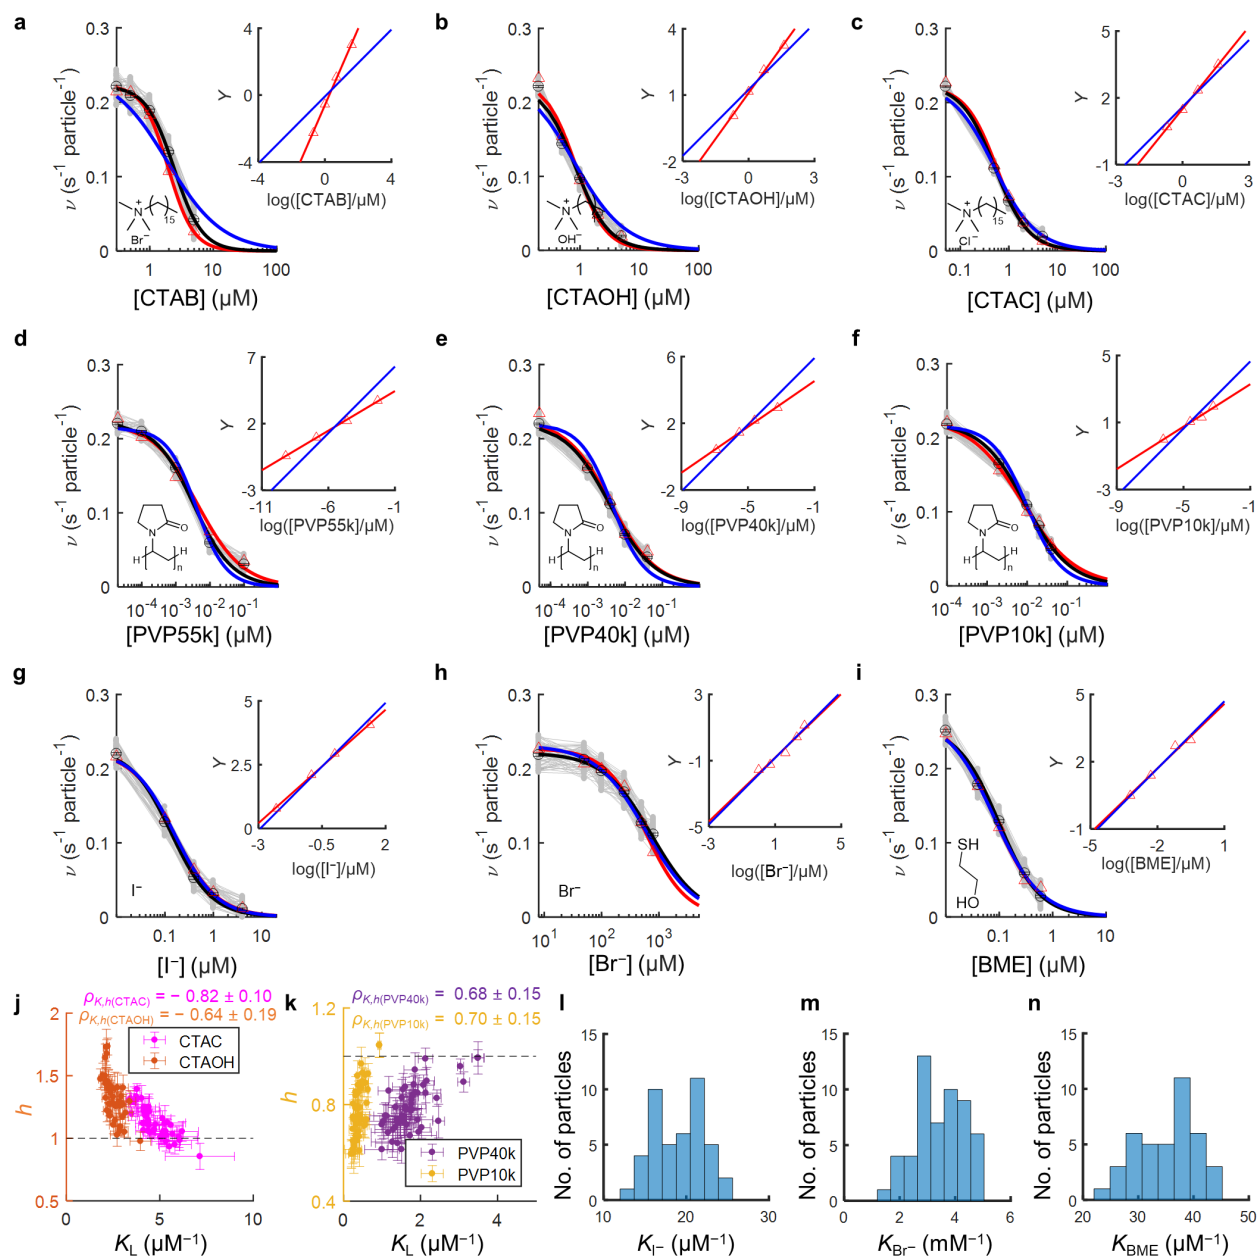

1219

1220 **Supplementary Fig. 12 | Examples of ligand competition titration plots of single 5-nm Au nanoparticles for CTAB (a),**  
 1221 **CTAOH (b), CTAC (c), PVP55k (d), PVP40k (e), PVP10k (f), I<sup>-</sup> (g), Br<sup>-</sup> (h), BME (i), respectively (grey),  $h$  vs.  $K$  plots for**  
 1222 **CTAC and CTAOH (j) and PVP40k and PVP10k (k), and histograms of  $K$  for I<sup>-</sup> (l), Br<sup>-</sup> (m) and BME (n) (Supplementary**  
 1223 **Information section 3.4). Data points at  $[L] = 0$  are placed on the  $y$ -axes manually. Red triangles: a single particle example under**  
 1224 **each condition; black circles: averages among many individual particles; red/black lines: corresponding fits with Eq. (1). Blue line:**  
 1225 **Fits with  $h$  set to 1. Insets: the corresponding Hill plots of the selected single particles (points); lines: fits with the rearranged linear**  
 1226 **Hill form of Eq. (1) (Eq. S14) with  $h$  floating (red) or set to 1 (blue); the slope here is  $h$ . Error bars are s.e.m. All fitting parameters**  
 1227 **summarized in Supplementary Table 2b. a is the same as Fig. 1b; d same as Fig. 1c; and g same as Fig. 1d.**

1228 Comparing CTAB with CTAOH and CTAC, their adsorption affinities on 5-nm Au nanoparticles  
 1229 follow  $K_{CTAB} < K_{CTAOH} < K_{CTAC}$  (Fig. 1f); this order is consistent with that Br<sup>-</sup> co-adsorbs with CTA<sup>+</sup> on Au  
 1230 surfaces, which likely weakens the columbic attraction between CTA<sup>+</sup> and the negatively-charged Au  
 1231 nanoparticle surface, whereas Cl<sup>-</sup> barely co-adsorbs<sup>31</sup>. Moreover, they both show positive adsorption  
 1232 cooperativity ( $h > 1$ ) like CTAB, where stronger affinity accompanies weaker cooperativity (Fig. 1f). The  
 1233 smaller  $h$  of CTAOH and CTAC indicates the counter anion plays a role in cooperativity, besides in affinity.

1234 For PVP, upon decreasing the average molecular weight from 55k to 40k and 10k g/mol, the  
1235 average adsorption affinity ( $K$ ) decreases (Fig. 1g) and becomes unmeasurable for the monomer *N*-  
1236 vinylpyrrolidone (Supplementary Fig. 9j); this strong dependence suggests that PVP adsorption on Au  
1237 particle surfaces is enhanced by multivalency effects. Interestingly, their Hill coefficients  $h$  are about the  
1238 same ( $\sim 0.7$ , Fig. 1g), suggesting that the inter-chain interactions of PVP are dominated by sub-chain  
1239 structural features, like thermal blobs, which are similar in size regardless of the molecular weight<sup>32</sup>.

1240 For halides, on average,  $K_{\text{I}^-} = 5.8 \pm 0.1 \mu\text{M}^{-1}$ , larger than  $K_{\text{Br}^-} = 0.0034 \pm 0.0001 \mu\text{M}^{-1}$  (Fig. 1h;  
1241 the contribution of their potassium counter-cations is negligible; Section 2), corroborating a known trend<sup>33-  
1242 35</sup>.

1243 For  $\beta$ -mercaptoethanol, its  $K_{\text{BME}} = 35 \pm 1 \mu\text{M}^{-1}$ , comparable to those from bulk calorimetry  
1244 measurements<sup>36,37</sup> and in which the thiol group dominates as ethanol adsorption is minimal (Supplementary  
1245 Fig. 9k).

## 1246 4 Supplementary results of COMPEITS imaging of ligand adsorption on single Au nanoplates

### 1247 4.1 COMPEITS images indicate spatially (in)homogeneous adsorption on single nanoplates of 1248 different ligands

1249 Each pixel of the COMPEITS image was calculated as  $\Delta(n^{-1}) = 1/n_2 - 1/n_1$ , where the subscript 1  
1250 and 2 represents the images with zero and high  $[\text{L}]$ , respectively. As  $\Delta(n^{-1}) \propto \Delta(v^{-1}) \propto K_{\text{L}}^h$  based on Eq. (1)  
1251 and Eq. S13, one can visualize directly the differences in  $K_{\text{L}}^h$  spatially in such COMPEITS images.

1252 As described in the main text, we studied Au nanoplates for adsorption by six ligands, spanning  
1253 positive (i.e., CTAB), negative (i.e., PVP55k and PVP10k), and no cooperativity (i.e., BME,  $\text{I}^-$ , and  $\text{Br}^-$ ).  
1254 Representative COMPEITS images give direct visual presentations of their preferential (or non-preferential)  
1255 adsorption on different locations on single nanoplates (Supplementary Fig. 13). CTAB (Supplementary Fig.  
1256 13a), PVP55k (Supplementary Fig. 13b), and PVP10k (Supplementary Fig. 13c) adsorb more strongly at  
1257 the corner and edge regions than at the flat facet region, while  $\text{I}^-$  (Supplementary Fig. 13d) and  $\text{Br}^-$   
1258 (Supplementary Fig. 13e) prefer to adsorb on the flat facet. On the other hand, BME shows no apparent  
1259 preference among the regions (Supplementary Fig. 13f). Within the flat facet, all ligands except BME show  
1260 a larger adsorption affinity at the center of the flat facet than at the periphery.

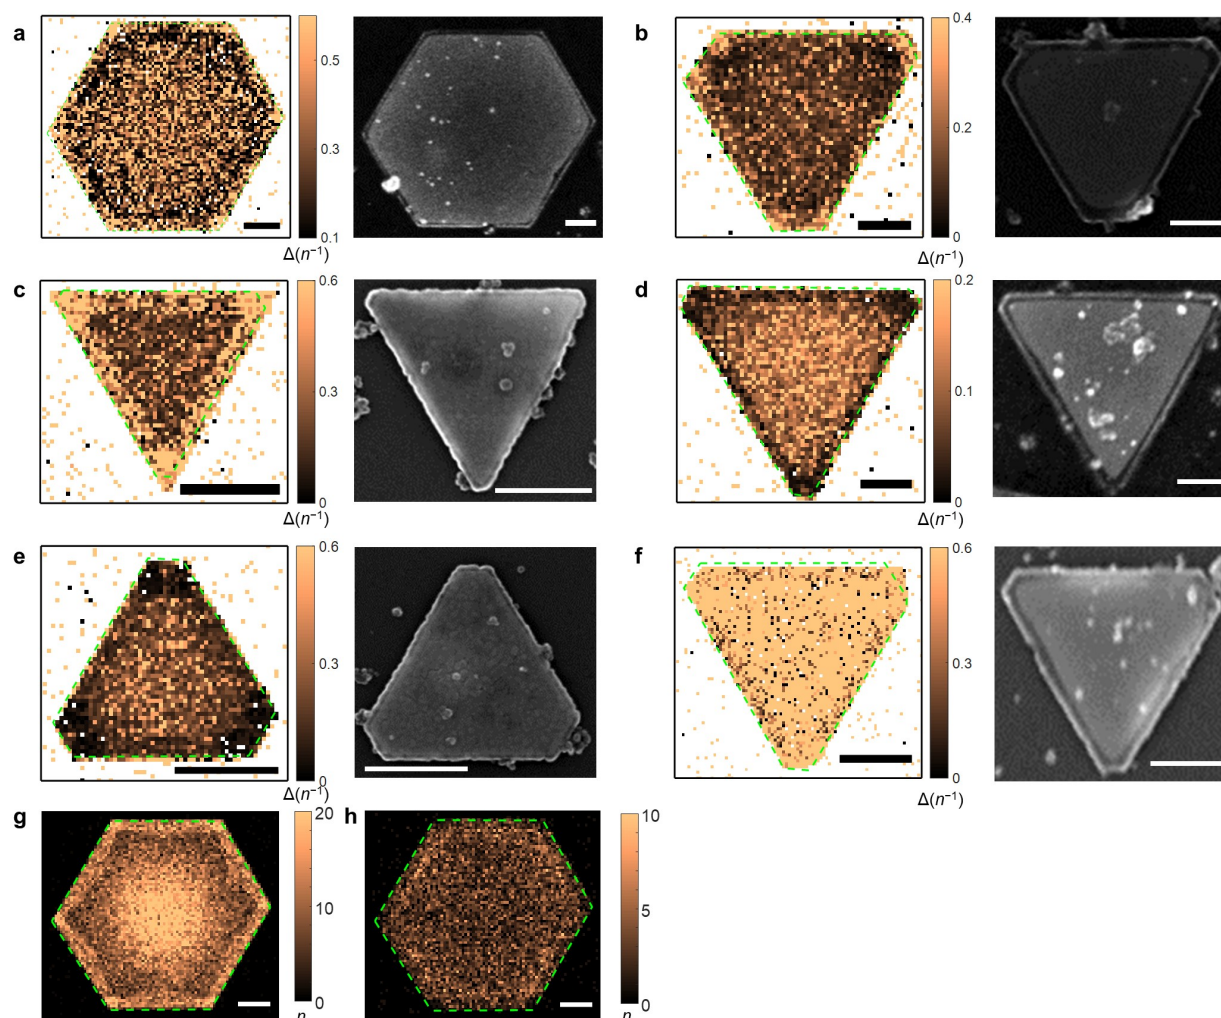

1261  
 1262 **Supplementary Fig. 13 | Representative COMPEITS images showing the adsorption of different ligands on single Au**  
 1263 **nanoplates and the corresponding SEM images** (Supplementary Information section 4.1). The ligands and experimental  
 1264 conditions are: CTAB at 0 and 0.50  $\mu\text{M}$  (a), PVP55k at 0 and 4.0 nM (b), PVP10k at 0 and 10 nM (c),  $\text{I}^-$  at 0 and 0.10  $\mu\text{M}$  (d),  $\text{Br}^-$   
 1265 at 0 and 2.0 mM (e), and BME at 0 and 50 nM (f), respectively. COMPEITS images (left panels): white/null pixels represent  
 1266 occasional negative values or infinities due to  $1/0$  calculations; pixel size:  $40 \times 40 \text{ nm}^2$  for a, b, and d, and otherwise  $20 \times 20 \text{ nm}^2$ .  
 1267 The small bright objects in the SEM images (right panels) are small mesoporous silica particles adsorbed onto the mesoporous  
 1268 silica shell; they have no observable effect on the COMPEITS images nor the titration curves. All scale bars are 500 nm. g-h, Super  
 1269 resolution images of product molecules on the nanoplate shown in a at  $[\text{CTAB}] = 0$  (g) and  $[\text{CTAB}] = 0.50 \mu\text{M}$  (h); pixel size:  $40$   
 1270  $\times 40 \text{ nm}^2$ . a is also presented in Fig. 2a and 2d in the main text.

1271 **4.2 The decrease in reaction rates during COMPEITS titration is not due to catalyst deactivation**

1272 A set of control experiments was performed to test the stability of the mesoporous silica coated Au  
 1273 nanoplates under the imaging conditions. As described earlier, the nanoplates were first titrated at  
 1274 increasing concentrations of R, and then at increasing concentrations of the ligand at the highest  
 1275 concentration of R. The red curve in Supplementary Fig. 14 shows the change of averaged reaction rate of  
 1276 all nanoplates ( $\langle v_{\text{NP}} \rangle$ ) within 0.5 h in the first flow cell as the titration progressed. The black curve shows the  
 1277 progress of ( $\langle v_{\text{NP}} \rangle$ ) from nanoplates in the second flow cell (prepared with the same batched of nanoplates),  
 1278 where the data points starting at time = 2 h were all collected at  $[\text{R}] = 0.1 \mu\text{M}$  with no CTAB. Both flow  
 1279 cells went through the same titration conditions before time = 2 h, and the ( $\langle v_{\text{NP}} \rangle$ ) at each condition were the  
 1280 same within errors before time = 2 h (not shown in the figure for brevity). The black curve clearly shows



1281 that without the introduction of CTAB, the nanoplates remain stable for at least 4 hours, within the duration  
 1282 of a set of COMPEITS titration experiments.

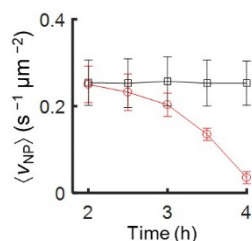

1283  
 1284 **Supplementary Fig. 14 | Control experiments for the stability of Au nanoplates over time.** Data on the red curve was a part of  
 1285 a typical titration experiment, where  $[R]$  was held at  $0.1 \mu M$ ,  $[NH_2OH]$  was  $1 \text{ mM}$ , and  $[CTAB]$  is  $0, 0.5, 1, 2,$  and  $5 \mu M$ , respectively.  
 1286 Points on the black curve were all collected at the same solution with  $0.1 \mu M$  of  $R$  and  $1 \text{ mM}$  of  $NH_2OH$ . Each point represents the  
 1287 average activity of  $\sim 30$  nanoplates within  $0.5 \text{ h}$ . Error bars are s.d.

### 1288 4.3 Additional statistical plots of $K$ and $h$ of ligand adsorption on single nanoplates reveal sub- 1289 particle and sub-facet differences

1290 As described in Section 1.5, fitting the titration curve of a region of a single nanoplate gives the  
 1291 corresponding  $K$  and  $h$  values of the corresponding region. In this way, the  $K$  vs.  $h$  correlation plot from  
 1292 multiple nanoplates could be obtained for a ligand showing cooperativity (Supplementary Fig. 15). The  
 1293 correlations of  $K$  and  $h$ , as well as the distributions of  $K$  and  $h$  at different regions can be seen for CTAB,  
 1294 PVP55k, and PVP10k (Supplementary Fig. 15a-c). As for  $I^-$ ,  $Br^-$ , and BME,  $h$  is fixed to 1, so only  
 1295 distributions of  $K$  are shown (Supplementary Fig. 15d-f). The mean and the standard error of the mean for  
 1296 these values, as well as the Pearson's cross correlation coefficients, are summarized in Supplementary Table  
 1297 3. Pearson's cross-correlation coefficient  $\rho(x,y)$  is a measure of the strength and direction of the linear  
 1298 relationship between two variables  $x$  and  $y$ . It can be calculated by the following equation:

$$\rho(x, y) = \frac{\sum_{i=1}^n (x_i - \langle x \rangle)(y_i - \langle y \rangle)}{\sqrt{\sum_{i=1}^n (x_i - \langle x \rangle)^2} \sqrt{\sum_{i=1}^n (y_i - \langle y \rangle)^2}} \quad \text{Eq. S20}$$

1299 where  $n$  is the sample size,  $\langle \rangle$  denotes averaging. Thus,  $\rho$  is essentially a normalized measurement of the  
 1300 covariance, and always has a value between  $-1$  and  $1$ :  $\rho(x,y) = 1$  implies that  $x$  and  $y$  can be perfectly  
 1301 described by a linear equation, with all data points lying on a line for which  $y$  increases as  $x$  increases;  $\rho(x,y)$   
 1302  $= -1$  implies that all data points lie on a line for which  $y$  decreases as  $x$  increases;  $\rho(x,y) = 0$  implies that  
 1303 there is no linear correlation between the variables.

1304 **Supplementary Table 3 | Summary of average values and their cross correlation coefficients of  $K$  and  $h$  of different ligands  
 1305 at different regions of nanoplates.** Parts of these data are plotted in Fig. 2. Errors of  $K$  and  $h$  are s.e.m.; errors of cross correlation  
 1306 coefficients are 95% confidence bounds.

| Ligand  | No. of nanoplates measured | $K_c (M^{-1})$                     | $K_e (M^{-1})$                     | $K_r (M^{-1})$                     | $h_c$           | $h_e$           | $h_r$           | $\rho(K_c, h_c)$ | $\rho(K_e, h_e)$ | $\rho(K_r, h_r)$ |
|---------|----------------------------|------------------------------------|------------------------------------|------------------------------------|-----------------|-----------------|-----------------|------------------|------------------|------------------|
| PVP55k  | 40                         | $1.3 \pm 0.2$<br>( $\times 10^9$ ) | $6.2 \pm 1.4$<br>( $\times 10^8$ ) | $3.7 \pm 1.3$<br>( $\times 10^8$ ) | $0.84 \pm 0.10$ | $0.77 \pm 0.08$ | $0.68 \pm 0.09$ | $0.77 \pm 0.16$  | $0.85 \pm 0.04$  | $0.86 \pm 0.10$  |
| PVP10k  | 30                         | $4.7 \pm 0.4$<br>( $\times 10^8$ ) | $4.2 \pm 0.5$<br>( $\times 10^8$ ) | $3.2 \pm 0.4$<br>( $\times 10^8$ ) | $0.90 \pm 0.05$ | $0.80 \pm 0.05$ | $0.76 \pm 0.03$ | $0.87 \pm 0.10$  | $0.86 \pm 0.03$  | $0.89 \pm 0.08$  |
| BME     | 40                         | $4.9 \pm 0.4$<br>( $\times 10^7$ ) | $4.8 \pm 0.4$<br>( $\times 10^7$ ) | $4.8 \pm 0.4$<br>( $\times 10^7$ ) | 1               | 1               | 1               | N/A              | N/A              | N/A              |
| $I^-$   | 36                         | $5.2 \pm 0.3$<br>( $\times 10^6$ ) | $5.8 \pm 0.5$<br>( $\times 10^6$ ) | $6.4 \pm 0.5$<br>( $\times 10^6$ ) | 1               | 1               | 1               | N/A              | N/A              | N/A              |
| CTAB    | 55                         | $9.1 \pm 0.3$<br>( $\times 10^5$ ) | $7.8 \pm 0.3$<br>( $\times 10^5$ ) | $5.4 \pm 0.3$<br>( $\times 10^5$ ) | $1.7 \pm 0.1$   | $1.8 \pm 0.1$   | $2.2 \pm 0.1$   | $-0.36 \pm 0.25$ | $-0.47 \pm 0.21$ | $-0.42 \pm 0.23$ |
| $Br^-$  | 35                         | $1.3 \pm 0.1$<br>( $\times 10^3$ ) | $1.6 \pm 0.1$<br>( $\times 10^3$ ) | $2.8 \pm 0.2$<br>( $\times 10^3$ ) | 1               | 1               | 1               | N/A              | N/A              | N/A              |
| (Cont.) |                            |                                    |                                    |                                    |                 |                 |                 |                  |                  |                  |
| Ligand  | No. of nanoplates measured | $K_i (M^{-1})$                     | $K_m (M^{-1})$                     | $K_o (M^{-1})$                     | $h_i$           | $h_m$           | $h_o$           | $\rho(K_i, h_i)$ | $\rho(K_m, h_m)$ | $\rho(K_o, h_o)$ |

|                 |    |                                    |                                    |                                    |                 |                 |                 |                  |                  |                  |
|-----------------|----|------------------------------------|------------------------------------|------------------------------------|-----------------|-----------------|-----------------|------------------|------------------|------------------|
| PVP55k          | 40 | $4.8 \pm 0.9$<br>( $\times 10^8$ ) | $3.7 \pm 1.0$<br>( $\times 10^8$ ) | $2.6 \pm 0.7$<br>( $\times 10^8$ ) | $0.59 \pm 0.09$ | $0.72 \pm 0.08$ | $0.76 \pm 0.09$ | $0.73 \pm 0.16$  | $0.62 \pm 0.21$  | $0.58 \pm 0.23$  |
| PVP10k          | 30 | $3.5 \pm 0.3$<br>( $\times 10^8$ ) | $3.2 \pm 0.3$<br>( $\times 10^8$ ) | $2.8 \pm 0.3$<br>( $\times 10^8$ ) | $0.72 \pm 0.05$ | $0.79 \pm 0.05$ | $0.87 \pm 0.04$ | $0.78 \pm 0.14$  | $0.86 \pm 0.10$  | $0.85 \pm 0.10$  |
| BME             | 40 | $4.9 \pm 0.5$<br>( $\times 10^7$ ) | $4.6 \pm 0.4$<br>( $\times 10^7$ ) | $4.4 \pm 0.4$<br>( $\times 10^7$ ) | 1               | 1               | 1               | N/A              | N/A              | N/A              |
| I <sup>-</sup>  | 36 | $6.9 \pm 0.4$<br>( $\times 10^6$ ) | $6.4 \pm 0.4$<br>( $\times 10^6$ ) | $5.9 \pm 0.4$<br>( $\times 10^6$ ) | 1               | 1               | 1               | N/A              | N/A              | N/A              |
| CTAB            | 55 | $6.8 \pm 0.3$<br>( $\times 10^5$ ) | $5.4 \pm 0.3$<br>( $\times 10^5$ ) | $4.0 \pm 0.2$<br>( $\times 10^5$ ) | $2.4 \pm 0.1$   | $2.2 \pm 0.1$   | $2.0 \pm 0.1$   | $-0.45 \pm 0.22$ | $-0.46 \pm 0.22$ | $-0.38 \pm 0.24$ |
| Br <sup>-</sup> | 35 | $3.1 \pm 0.2$<br>( $\times 10^3$ ) | $2.8 \pm 0.2$<br>( $\times 10^3$ ) | $2.1 \pm 0.2$<br>( $\times 10^3$ ) | 1               | 1               | 1               | N/A              | N/A              | N/A              |

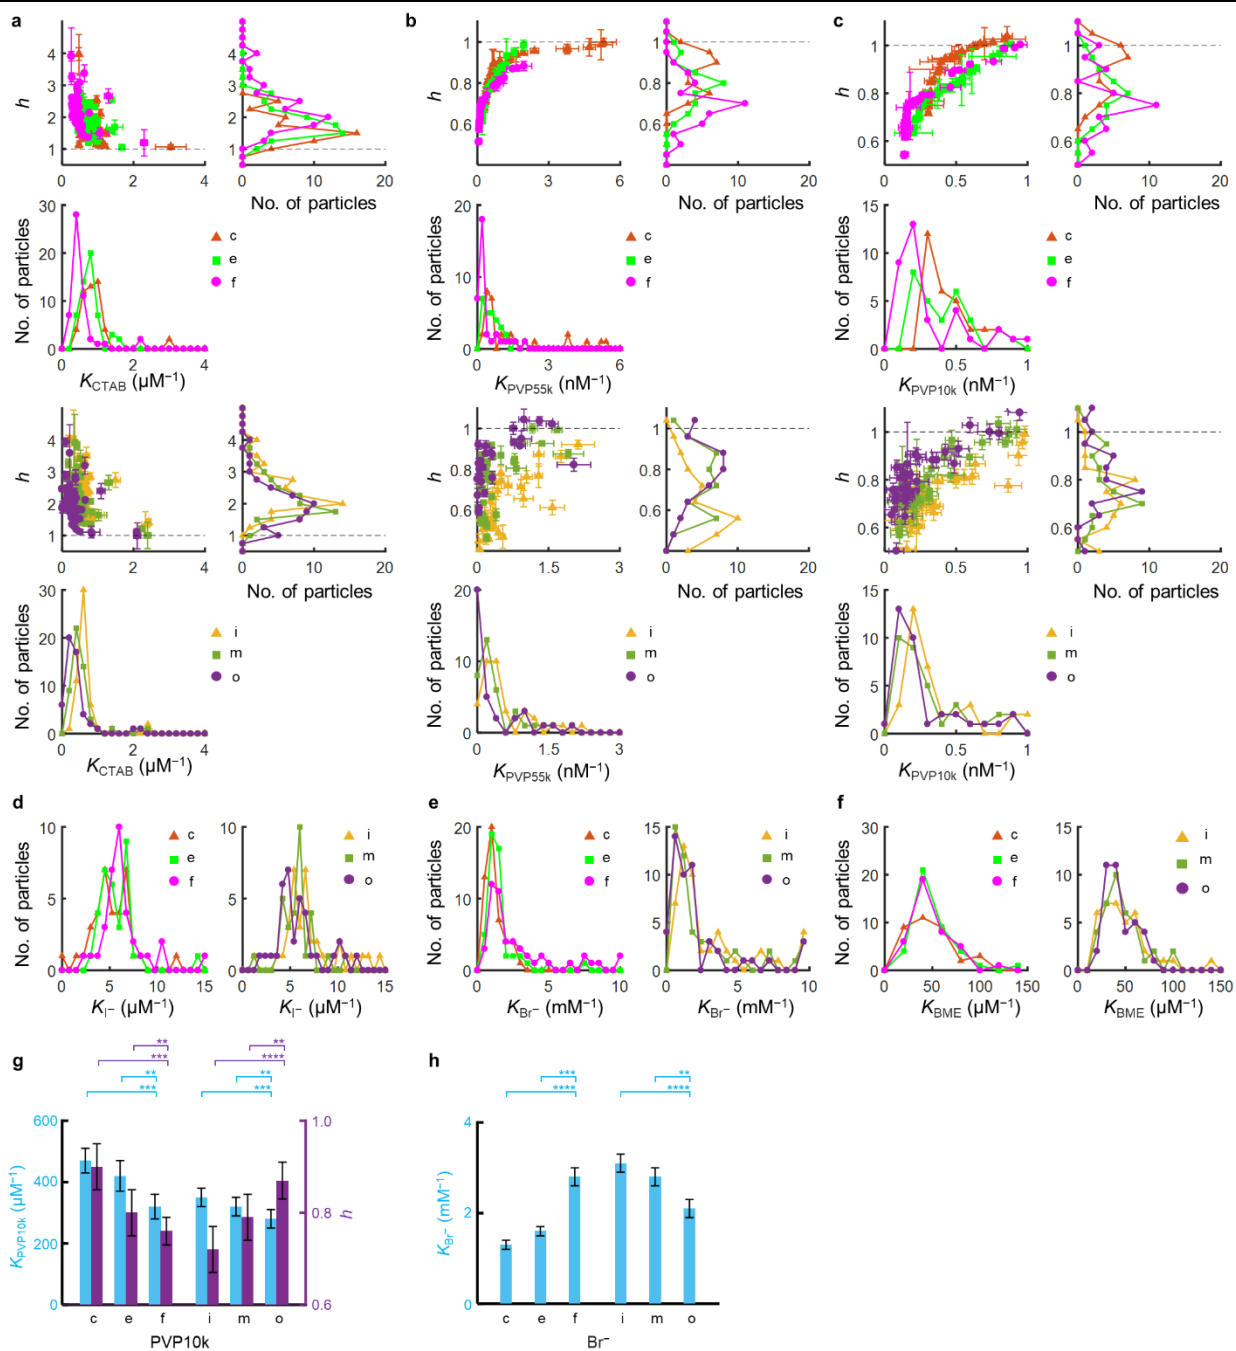

1307

1308

1309

**Supplementary Fig. 15 | Distributions of  $K$  (and  $h$ ) of different ligands at different regions of Au nanoplates** (Supplementary Information section 4.3). The scatter plots and histograms are included for ligands showing cooperativity: CTAB (a), PVP55k (b),

SI 28



1310 and PVP10k (c); only the histograms of  $K$  are shown for  $\Gamma^-$  (d),  $\text{Br}^-$  (e), and BME (f) as they do not show cooperativity (i.e.,  $h =$   
1311 1). The mean and s.e.m. are listed in Supplementary Table 3. **a** (first row, left) and **b** (first row, left) are presented in Fig. 2h and i,  
1312 respectively. **g-h**, Facet and sub-facet differences in adsorption affinity ( $K$ ) and cooperativity ( $h$ ) of PVP10k (**g**) and  $\text{Br}^-$  (**h**, no  
1313 cooperativity) on 30 and 35 nanoplates, respectively.  $**p < 0.01$ ;  $***p < 0.001$ ;  $****p < 0.0001$ ; paired Student's  $t$  test. Error bars  
1314 in **a-c** are s.d. from titration curve fitting, s.e.m. in **g-h**.

1315

#### 1316 **4.4 Particle-averaged titration analyses also identify sub-particle differences in ligand adsorption**

1317 In addition to the single-particle analysis, an alternative way to analyze the data from multiple  
1318 nanoplates is to obtain  $\langle v \rangle$  ( $\langle \rangle$  denotes averaging) from all the nanoplates studied and then fit the  $\langle v \rangle - [L]$   
1319 plot (Supplementary Fig. 16 and Supplementary Table 4). The trends of  $K$  (and  $h$  for CTAB and PVP) can  
1320 also be directly seen for corner/edge/flat-facet regions (Supplementary Fig. 16A-C), confirming the  
1321 variations of adsorption behaviors at different facets on nanoplates. The values of  $K$  and  $h$  obtained from  
1322 fitting the particle-averaged titration curve (Supplementary Table 4) are comparable to those from single-  
1323 particle analysis (Supplementary Table 3).

1324 However, the particle-averaged analysis of in/mid/out sub-facet regions do not produce clear  
1325 differences in  $K$  and  $h$  (Supplementary Fig. 16Af-Aj). One reason is that different sized particles have  
1326 different gradients (i.e., heterogeneity among individual particles). Therefore, the trends of  $K$  and  $h$  for the  
1327 inner/middle/outer sub-facet regions are washed out and masked in the particle-averaged analysis. This  
1328 result highlights the advantages of single-particle imaging, which allows for single-particle analysis.



1333 dash line: particle-averaged data, the fit with Eq. S11, and the fit with Eq. S11 with  $h$  fixed to 1, respectively. (Ad-Ae) Similar to  
 1334 Ac, but for the edge region (Ad) and for the flat facet region (Ae). (Af-Aj) Similar to Aa-Ae, but for the inner, middle, and outer  
 1335 regions. (B-F) Similar to Aa-Ae, but for PVP55k (B), PVP10k (C),  $I^-$  (D),  $Br^-$  (E), and BME (F), respectively. As such particle-  
 1336 averaged analysis cannot effectively differentiate the  $K$  and  $h$  for inner/middle/outer sub-facet regions as shown in Af-Aj for CTAB,  
 1337 similar plots for other ligands are omitted. The corresponding fitting parameters are listed in Supplementary Table 4. All error bars  
 1338 are s.d.

1339 **Supplementary Table 4 | List of fitting parameters of particle-averaged titration curves of adsorption of different ligands**  
 1340 **on nanoplates shown in Supplementary Fig. 16.** Errors are s.d. from fitting.

| Ligand  | $K_c (M^{-1})$              | $K_e (M^{-1})$              | $K_f (M^{-1})$              | $h_c$           | $h_e$           | $h_f$           |
|---------|-----------------------------|-----------------------------|-----------------------------|-----------------|-----------------|-----------------|
| PVP55k  | $1.4 \pm 0.1 (\times 10^9)$ | $6.4 \pm 0.2 (\times 10^8)$ | $4.0 \pm 0.4 (\times 10^8)$ | $0.83 \pm 0.02$ | $0.75 \pm 0.01$ | $0.68 \pm 0.05$ |
| PVP10k  | $5.1 \pm 0.3 (\times 10^8)$ | $4.6 \pm 0.4 (\times 10^8)$ | $3.1 \pm 0.6 (\times 10^8)$ | $0.89 \pm 0.02$ | $0.84 \pm 0.03$ | $0.76 \pm 0.05$ |
| BME     | $5.1 \pm 0.4 (\times 10^7)$ | $4.8 \pm 0.3 (\times 10^7)$ | $4.8 \pm 0.2 (\times 10^7)$ | 1               | 1               | 1               |
| $I^-$   | $5.2 \pm 0.3 (\times 10^6)$ | $5.8 \pm 0.5 (\times 10^6)$ | $6.4 \pm 0.5 (\times 10^6)$ | 1               | 1               | 1               |
| CTAB    | $9.3 \pm 0.8 (\times 10^5)$ | $7.6 \pm 0.6 (\times 10^5)$ | $5.8 \pm 0.3 (\times 10^5)$ | $1.7 \pm 0.2$   | $1.8 \pm 0.2$   | $2.2 \pm 0.2$   |
| $Br^-$  | $1.3 \pm 0.1 (\times 10^3)$ | $1.6 \pm 0.1 (\times 10^3)$ | $2.8 \pm 0.2 (\times 10^3)$ | 1               | 1               | 1               |
| (Cont.) |                             |                             |                             |                 |                 |                 |
| Ligand  | $K_i (M^{-1})$              | $K_m (M^{-1})$              | $K_o (M^{-1})$              | $h_i$           | $h_m$           | $h_o$           |
| CTAB    | $5.6 \pm 1.3 (\times 10^5)$ | $5.5 \pm 1.5 (\times 10^5)$ | $6.9 \pm 1.8 (\times 10^5)$ | $2.1 \pm 0.7$   | $2.0 \pm 0.8$   | $1.8 \pm 0.6$   |

#### 1341 4.5 Adsorption strength and cooperativity vs. nanoplate size and shape

1342 With the data available, we looked into the potential impacts of the sizes or shapes of the nanoplates  
 1343 on the ligand adsorption behaviors. To that end, the  $K$  or  $h$  of individual particles/regions is plotted against  
 1344 the radius (i.e., the average distance from the center to the vertex) or the shape factor (i.e., the ratio of the  
 1345 length sum of the shorter three edges to the length sum of the longer three from the view of a hexagon,  
 1346 which is 0 for a triangle and 1 for a regular hexagon (see Supplementary Fig. 1e for distributions), and the  
 1347 corresponding Pearson's cross correlation coefficients are calculated (e.g., Supplementary Fig. 17 and  
 1348 Supplementary Table 5 on CTAB, PVP55k, and  $I^-$ ).

1349 Within the errors of the Pearson's cross correlation coefficients,  $K$  or  $h$  of the corner and edge  
 1350 regions show no clear correlation with the size or shape of the nanoplates (e.g., Supplementary Fig. 17Aa-  
 1351 Ad). We attribute this to that the size of the nanoplates exceeds the range where the size plays a significant  
 1352 role.

1353 On the other hand, adsorption affinities on the overall flat facet region or the inner, middle, and  
 1354 outer sub-facet regions correlate negatively with the particle sizes (e.g., Supplementary Fig. 17Ae, Ag). We  
 1355 previously established that on the flat facet, the structural defects decrease in density from the center toward  
 1356 the periphery because of their seeded growth mechanism<sup>2</sup>. Therefore, the size effect in this case can be  
 1357 attributed to the differences in density of structural defects. The shape of the nanoplates has no observable  
 1358 effect on the ligand adsorption behaviors on the inner, middle, and outer sub-facet regions (e.g.,  
 1359 Supplementary Fig. 17Af, Ah).

1360 The corresponding plots for PVP10k,  $Br^-$ , and BME look similar to those shown in Supplementary  
 1361 Fig. 17 and thus omitted to avoid redundancy.

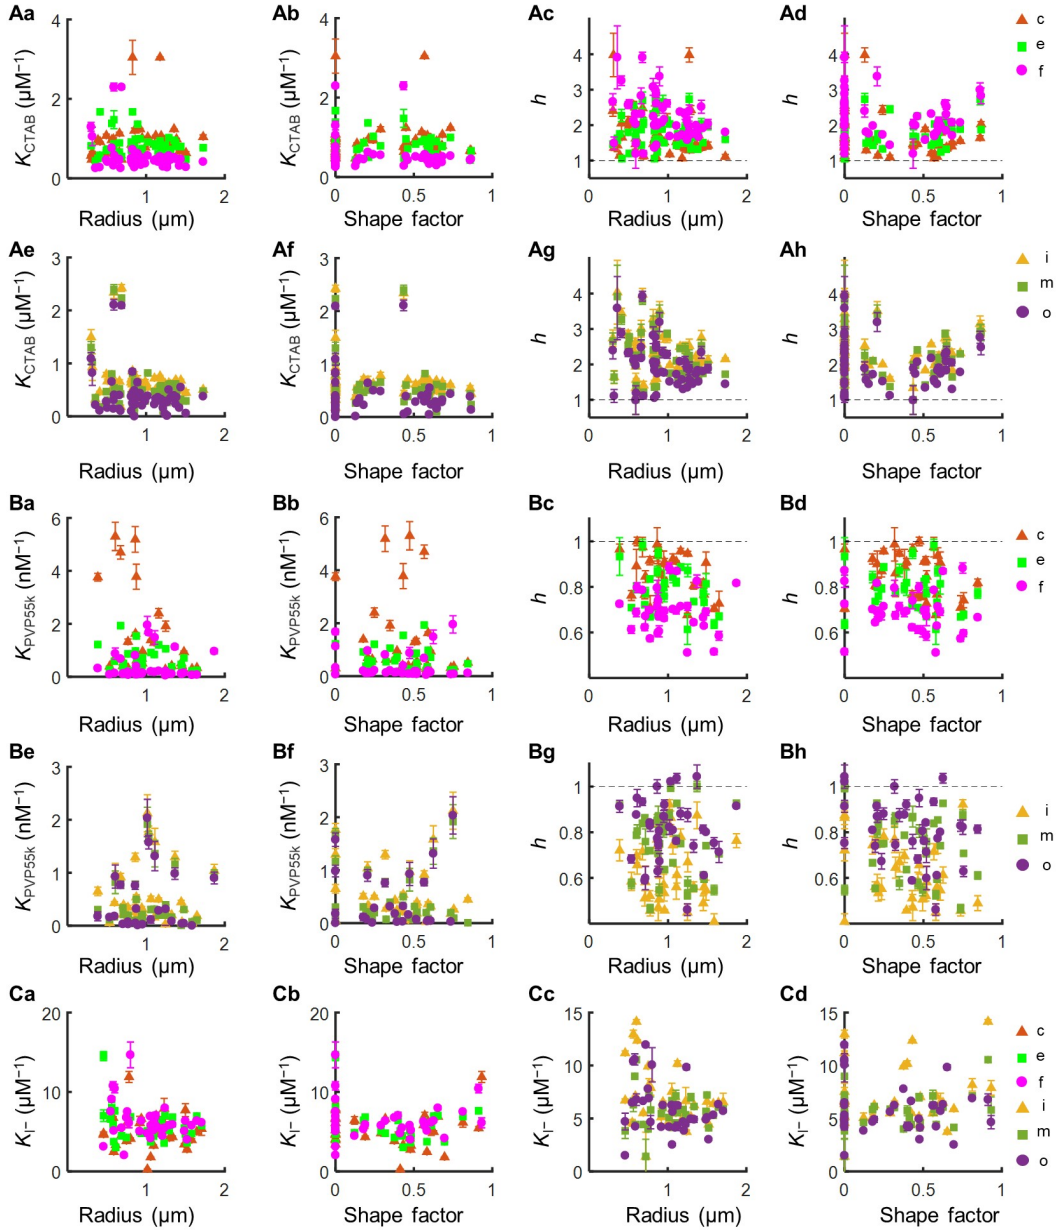

1362

1363

1364

1365

1366

1367

1368

**Supplementary Fig. 17 | Effects of the size and shape of nanoplates on the  $K$  and  $h$  of ligand adsorption.** (Aa-Ad) Correlation plots of  $K_{\text{CTAB}}$  - radius (Aa),  $K_{\text{CTAB}}$  - shape factor (Ab), radius -  $h$  (Ac), and shape factor -  $h$  (Ad) for CTAB adsorption at the corner, edge, and flat facet regions of individual nanoplates. (Ae-Ah) Similar to Aa-Ad, but for CTAB adsorption at the inner, middle, and outer regions. (B-C) Similar to A, but for the adsorption of PVP55k (B) and  $\text{I}^-$  (C).

**Supplementary Table 5 | List of Pearson's cross correlation coefficients for  $K$  and  $h$  vs. the radius or the shape factor.** Errors are 95% confidence bounds.

| CTAB         | $K_c$            | $K_e$            | $K_f$            | $h_c$            | $h_e$            | $h_f$            |
|--------------|------------------|------------------|------------------|------------------|------------------|------------------|
| radius       | $0.17 \pm 0.27$  | $-0.16 \pm 0.26$ | $-0.31 \pm 0.25$ | $-0.20 \pm 0.27$ | $-0.06 \pm 0.25$ | $-0.33 \pm 0.25$ |
| shape factor | $0.08 \pm 0.28$  | $-0.05 \pm 0.27$ | $-0.09 \pm 0.27$ | $-0.25 \pm 0.26$ | $-0.01 \pm 0.27$ | $-0.12 \pm 0.27$ |
| CTAB         | $K_i$            | $K_m$            | $K_o$            | $h_i$            | $h_m$            | $h_o$            |
| radius       | $-0.28 \pm 0.25$ | $-0.26 \pm 0.26$ | $-0.29 \pm 0.25$ | $-0.30 \pm 0.25$ | $-0.34 \pm 0.24$ | $-0.33 \pm 0.25$ |
| shape factor | $-0.08 \pm 0.27$ | $-0.11 \pm 0.27$ | $-0.09 \pm 0.27$ | $-0.13 \pm 0.27$ | $-0.12 \pm 0.27$ | $-0.12 \pm 0.27$ |
| (Cont.)      |                  |                  |                  |                  |                  |                  |
| PVP55k       | $K_c$            | $K_e$            | $K_f$            | $h_c$            | $h_e$            | $h_f$            |
| radius       | $-0.01 \pm 0.33$ | $0.06 \pm 0.33$  | $0.04 \pm 0.33$  | $-0.10 \pm 0.33$ | $-0.15 \pm 0.33$ | $-0.04 \pm 0.33$ |

|              |                  |                  |                  |                  |                  |                  |
|--------------|------------------|------------------|------------------|------------------|------------------|------------------|
| shape factor | $-0.10 \pm 0.33$ | $-0.11 \pm 0.33$ | $-0.08 \pm 0.33$ | $-0.36 \pm 0.30$ | $-0.31 \pm 0.30$ | $-0.34 \pm 0.30$ |
| PVP55k       | $K_i$            | $K_m$            | $K_o$            | $h_i$            | $h_m$            | $h_o$            |
| radius       | $-0.38 \pm 0.31$ | $-0.28 \pm 0.35$ | $0.06 \pm 0.33$  | $-0.36 \pm 0.32$ | $-0.35 \pm 0.33$ | $-0.07 \pm 0.33$ |
| shape factor | $-0.15 \pm 0.35$ | $-0.15 \pm 0.37$ | $-0.08 \pm 0.33$ | $-0.25 \pm 0.34$ | $-0.20 \pm 0.36$ | $-0.16 \pm 0.33$ |
| (Cont.)      |                  |                  |                  |                  |                  |                  |
| $\Gamma^-$   | $K_c$            | $K_e$            | $K_f$            | $K_i$            | $K_m$            | $K_o$            |
| radius       | $-0.07 \pm 0.33$ | $-0.30 \pm 0.32$ | $-0.25 \pm 0.32$ | $-0.42 \pm 0.28$ | $0.00 \pm 0.35$  | $-0.27 \pm 0.21$ |
| shape factor | $0.01 \pm 0.33$  | $-0.15 \pm 0.34$ | $0.00 \pm 0.34$  | $0.18 \pm 0.33$  | $0.22 \pm 0.34$  | $-0.13 \pm 0.33$ |

## 1369 5 Supplementary results of COMPEITS imaging of ligand adsorption on single Au nanorods

### 1370 5.1 Additional statistical plots of $K$ and $h$ of ligand adsorption on single nanorods reveal sub- 1371 particle and sub-facet differences

1372 In parallel to the analysis of ligand adsorption on nanoplates discussed in Section 4.3,  $K$  and  $h$   
1373 values of different regions of single nanorods can be obtained from fitting the titration curve of the  
1374 corresponding region. The resultant  $K$  vs.  $h$  correlation plots and distributions are shown for CTAB and  
1375 PVP55k (Supplementary Fig. 18a-b), and the distributions of  $K$  are shown for  $\Gamma^-$  and  $\text{Br}^-$  (Supplementary  
1376 Fig. 18c-d). The mean and standard error of the mean for these values and the Pearson's cross correlation  
1377 coefficients are summarized in Supplementary Table 6.

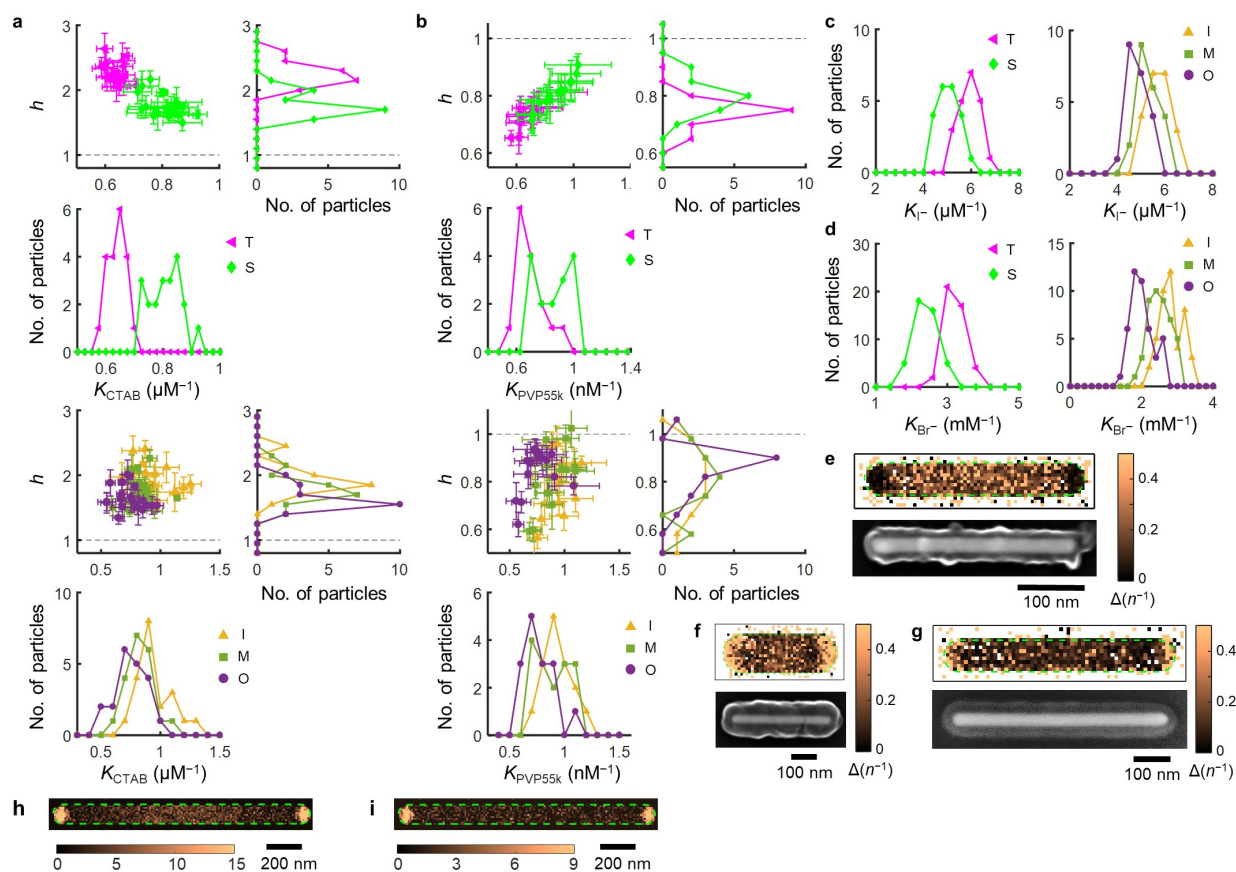

1378  
1379 **Supplementary Fig. 18 | Distributions of  $K$  (and  $h$ ) of different ligands at different regions of nanorods and additional**  
1380 **COMPEITS images.** The correlation plots and histograms are included for ligands showing cooperativity: CTAB (a) and PVP55k  
1381 (b); only the histograms of  $K$  are shown for  $\Gamma^-$  (c), and  $\text{Br}^-$  (d), which do not show cooperativity (i.e.,  $h = 1$ ). The mean and s.e.m.  
1382 are listed in Supplementary Table 6. Error bars are s.d. in a-b from fitting. e-g, Representative COMPEITS images (top) showing  
1383 the adsorption of different ligands on nanorods and the corresponding SEM images (bottom). The ligands and experimental  
1384 conditions are PVP55k at 0 and 10 nM (e),  $\Gamma^-$  at 0 and 0.10  $\mu\text{M}$  (f), and  $\text{Br}^-$  at 0 and 0.20 mM (g), respectively. COMPEITS images:  
1385 white/null pixels represent occasional negative values or infinities due to 1/0 calculations values; pixel size:  $10 \times 10 \text{ nm}^2$ . h-i, Super

1386 resolution images of product molecules on the nanorod shown in Fig. 3a at [CTAB] = 0 (**h**) and [CTAB] = 0.50  $\mu\text{M}$  (**i**); pixel size:  
 1387  $10 \times 10 \text{ nm}^2$ . Parts of **a** and **b** are also shown in Fig. 3.

1388 **Supplementary Table 6 | Summary of statistics of  $K$  and  $h$  of different ligands at different regions of nanorods.** Errors of  $K$   
 1389 and  $h$  are s.e.m.; errors of cross correlation coefficients are 95% confidence bounds.

| Ligand        | No. of nanorods | $K_T (\text{M}^{-1})$              | $K_S (\text{M}^{-1})$              | $h_T$           | $h_S$           | $\rho(K_T, h_T)$ | $\rho(K_S, h_S)$ |
|---------------|-----------------|------------------------------------|------------------------------------|-----------------|-----------------|------------------|------------------|
| PVP55k        | 15              | $6.9 \pm 0.9$<br>( $\times 10^8$ ) | $8.6 \pm 1.2$<br>( $\times 10^8$ ) | $0.73 \pm 0.04$ | $0.80 \pm 0.04$ | $0.80 \pm 0.12$  | $0.88 \pm 0.03$  |
| $\Gamma^-$    | 21              | $6.3 \pm 0.5$<br>( $\times 10^6$ ) | $5.3 \pm 0.5$<br>( $\times 10^6$ ) | 1               | 1               | N/A              | N/A              |
| CTAB          | 20              | $6.4 \pm 0.3$<br>( $\times 10^5$ ) | $8.1 \pm 0.6$<br>( $\times 10^5$ ) | $2.3 \pm 0.2$   | $1.8 \pm 0.2$   | $-0.30 \pm 0.21$ | $-0.51 \pm 0.17$ |
| $\text{Br}^-$ | 44              | $3.2 \pm 0.1$<br>( $\times 10^3$ ) | $2.4 \pm 0.1$<br>( $\times 10^3$ ) | 1               | 1               | N/A              | N/A              |

(Cont.)

| Ligand        | No. of nanorods | $K_I (\text{M}^{-1})$              | $K_M (\text{M}^{-1})$              | $K_O (\text{M}^{-1})$              | $h_I$           | $h_M$           | $h_O$           | $\rho(K_I, h_I)$ | $\rho(K_M, h_M)$ | $\rho(K_O, h_O)$ |
|---------------|-----------------|------------------------------------|------------------------------------|------------------------------------|-----------------|-----------------|-----------------|------------------|------------------|------------------|
| PVP55k        | 15              | $9.3 \pm 0.6$<br>( $\times 10^8$ ) | $8.9 \pm 0.7$<br>( $\times 10^8$ ) | $7.6 \pm 0.7$<br>( $\times 10^8$ ) | $0.76 \pm 0.07$ | $0.82 \pm 0.06$ | $0.86 \pm 0.06$ | $0.58 \pm 0.19$  | $0.59 \pm 0.18$  | $0.46 \pm 0.21$  |
| $\Gamma^-$    | 21              | $5.8 \pm 0.3$<br>( $\times 10^6$ ) | $5.5 \pm 0.3$<br>( $\times 10^6$ ) | $5.0 \pm 0.3$<br>( $\times 10^6$ ) | 1               | 1               | 1               | N/A              | N/A              | N/A              |
| CTAB          | 20              | $8.7 \pm 0.4$<br>( $\times 10^5$ ) | $8.3 \pm 0.3$<br>( $\times 10^5$ ) | $7.6 \pm 0.2$<br>( $\times 10^5$ ) | $1.9 \pm 0.1$   | $1.7 \pm 0.1$   | $1.6 \pm 0.1$   | $-0.40 \pm 0.19$ | $0.02 \pm 0.22$  | $-0.24 \pm 0.21$ |
| $\text{Br}^-$ | 44              | $2.8 \pm 0.2$<br>( $\times 10^3$ ) | $2.5 \pm 0.2$<br>( $\times 10^3$ ) | $2.0 \pm 0.2$<br>( $\times 10^3$ ) | 1               | 1               | 1               | N/A              | N/A              | N/A              |

1390

## 1391 5.2 Particle-averaged titration analyses also identify sub-particle differences in ligand adsorption

1392 Particle-averaged titration analyses are also performed for nanorods. Similar to the cases of  
 1393 nanoplates, the fitting results from the particle-averaged titration curves can effectively distinguish  $K$  (and  
 1394  $h$ ) from the different regions, i.e., the tip vs. the side facet regions, but did not discern clearly among the  
 1395 regions within the side facets, i.e., the IN, MID, and OUT regions (Supplementary Fig. 19 and  
 1396 Supplementary Table 7). The interpretation is the same as in Section 4.4.



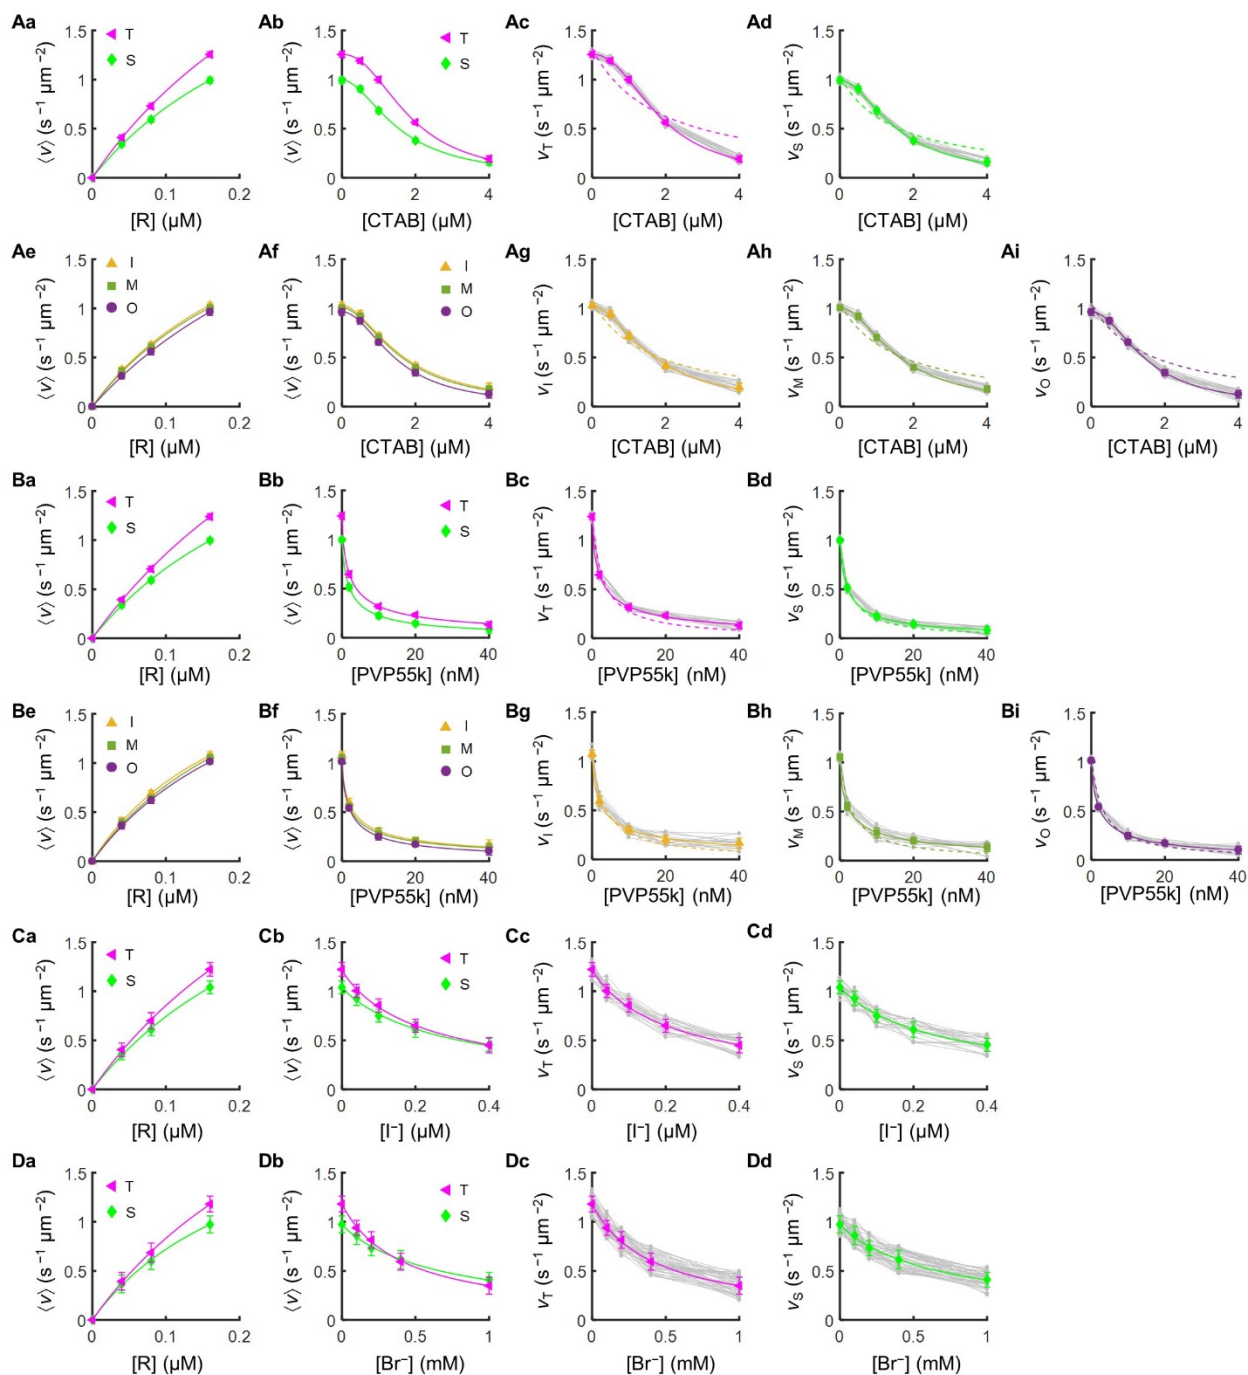

1397

1398 **Supplementary Fig. 19 | Particle-averaged titration analyses for ligand adsorption on nanorods.** (Aa-Ab) The particle-  
 1399 averaged  $\langle v \rangle$  - [R] curve (Aa) and the corresponding  $\langle v \rangle$  - [CTAB] curve (Ab) of the tip and side regions. (Ac) The  $v_T$  - [CTAB]  
 1400 titration plots for the tip regions of all single nanorods (grey). Colored triangles, solid line, and dash line: particle-averaged data,  
 1401 the fit with Eq. S11, and the fit with Eq. S11 with  $h$  fixed to 1, respectively. (Ad) Similar to Ac, but for the side region. (Ae-Ai)  
 1402 Similar to Aa-Ad, but for the IN, MID, and OUT regions. (B-F) Similar to A for PVP55k. (C-D) Similar to Aa-Ad for  $I^-$  (C) and  
 1403  $Br^-$  (D), respectively. The corresponding fitting parameters are listed in Supplementary Table 7. All error bars are s.d.

1404

1405 **Supplementary Table 7 | List of fitting parameters of particle-averaged titration curves of adsorption of different ligands**  
 1406 **on nanorods shown in Supplementary Fig. 19.** Errors are s.d. from fitting.

| Ligand     | $K_T (M^{-1})$              | $K_S (M^{-1})$              | $h_T$           | $h_S$           |
|------------|-----------------------------|-----------------------------|-----------------|-----------------|
| PVP55k     | $6.8 \pm 0.4 (\times 10^8)$ | $7.6 \pm 0.4 (\times 10^8)$ | $0.71 \pm 0.03$ | $0.81 \pm 0.05$ |
| $\Gamma^-$ | $6.2 \pm 0.5 (\times 10^6)$ | $5.2 \pm 0.5 (\times 10^6)$ | 1               | 1               |
| CTAB       | $6.3 \pm 0.6 (\times 10^5)$ | $8.0 \pm 0.3 (\times 10^5)$ | $2.2 \pm 0.2$   | $1.8 \pm 0.2$   |
| $Br^-$     | $3.4 \pm 0.4 (\times 10^3)$ | $2.5 \pm 0.2 (\times 10^3)$ | 1               | 1               |

(Cont.)

| Ligand | $K_T (M^{-1})$              | $K_M (M^{-1})$              | $K_O (M^{-1})$              | $h_I$           | $h_M$           | $h_O$           |
|--------|-----------------------------|-----------------------------|-----------------------------|-----------------|-----------------|-----------------|
| PVP55k | $8.8 \pm 0.1 (\times 10^8)$ | $8.9 \pm 0.2 (\times 10^8)$ | $7.8 \pm 0.4 (\times 10^8)$ | $0.68 \pm 0.22$ | $0.67 \pm 0.24$ | $0.77 \pm 0.21$ |
| CTAB   | $8.1 \pm 1.6 (\times 10^5)$ | $8.1 \pm 1.7 (\times 10^5)$ | $8.0 \pm 1.9 (\times 10^5)$ | $1.9 \pm 0.6$   | $1.9 \pm 0.7$   | $2.0 \pm 0.7$   |

### 1407 5.3 Adsorption strength and cooperativity vs. nanorod size

1408 To explore the effects of size on the ligand adsorption on nanorods, we chose two parameters as  
1409 the descriptors:  $D_T$ , the diameter of the semicircle of the tip region, which is also an effective measure of  
1410 the width of the nanorod, and  $L_S$ , the length of the side region, where the total length of a nanorod is  $D_T +$   
1411  $L_S$ . The correlation plots of these two parameters against  $K$  and  $h$  are shown in Supplementary Fig. 20, with  
1412 the Pearson's cross correlation coefficients listed in Supplementary Table 8. For CTAB, PVP55k, and  $\Gamma^-$ ,  
1413  $K_T$  correlates negatively with  $D_T$ , attributable to more under-coordinated sites available at smaller tip  
1414 regions. No other clear correlations were observed.



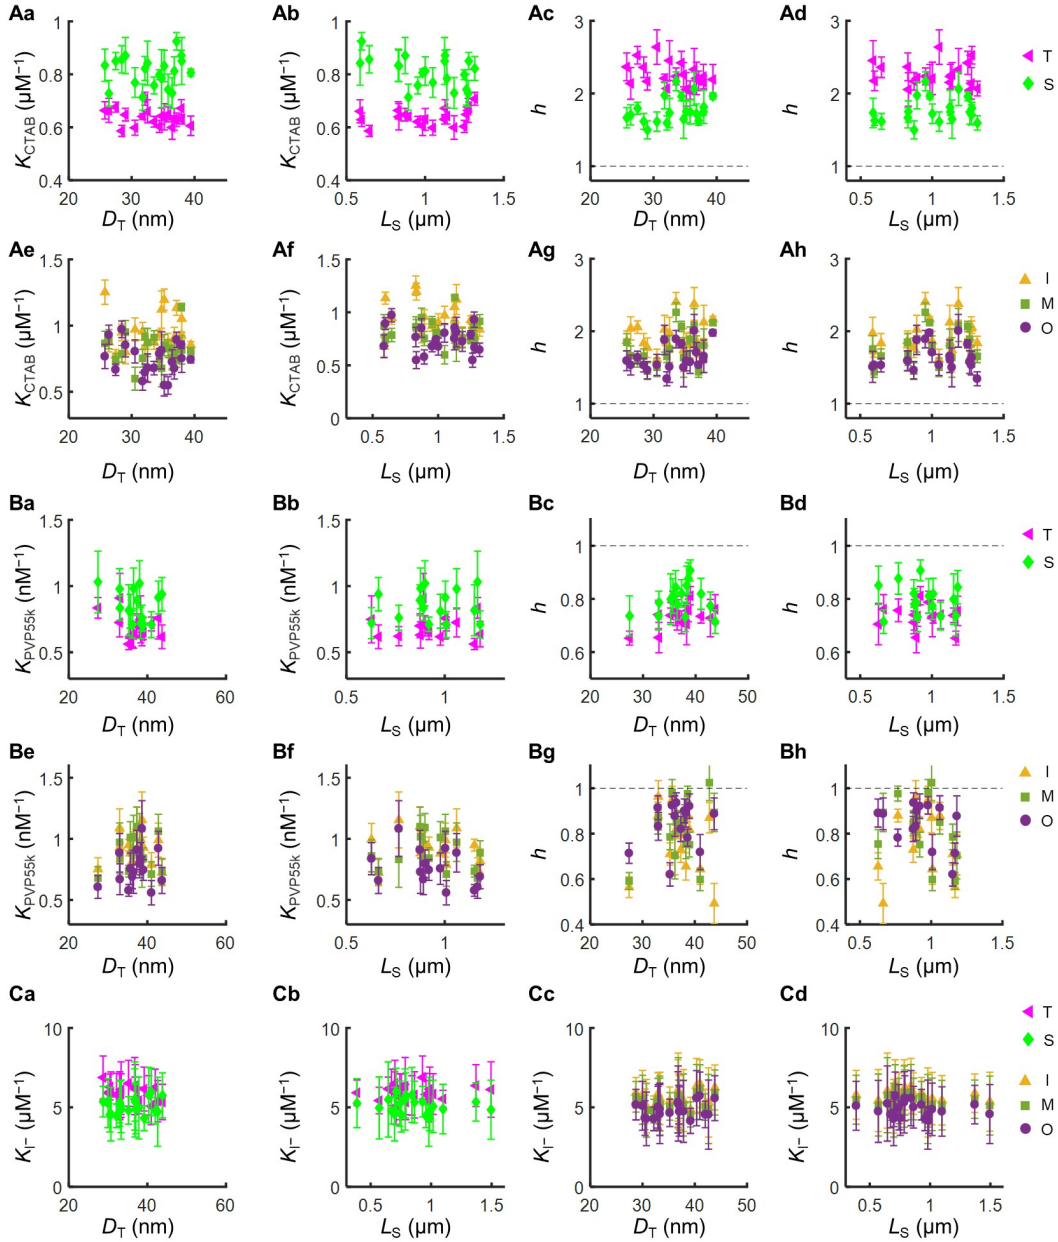

1415

1416 **Supplementary Fig. 20 | Effects of the size and shape of nanorods on the  $K$  and  $h$  of ligand adsorption.** (Aa-Ad) Correlation  
 1417 plots of  $K_{\text{CTAB}} - D_T$  (Aa),  $K_{\text{CTAB}} - L_S$  (Ab),  $D_T - h$  (Ac), and  $L_S - h$  (Ad) for CTAB adsorption at the tip and side regions. (Ae-Ah)  
 1418 Similar to Aa-Ad, but for CTAB adsorption at the IN, MID, and OUT regions. (B-C) Similar to A, but for the adsorption of PVP55k  
 1419 (B) and  $\Gamma$  (C).

1420

1421 **Supplementary Table 8 | List of Pearson's cross correlation coefficients for  $K$  and  $h$  vs. the size parameters  $D_T$  and  $L_S$ .** Errors  
 1422 are 95% confidence bounds.

| CTAB  | $K_T$            | $K_S$            | $h_T$            | $h_S$           |                 |                 |
|-------|------------------|------------------|------------------|-----------------|-----------------|-----------------|
| $D_T$ | $-0.27 \pm 0.21$ | $0.08 \pm 0.22$  | $-0.37 \pm 0.20$ | $0.16 \pm 0.20$ |                 |                 |
| $L_S$ | $0.17 \pm 0.21$  | $-0.26 \pm 0.19$ | $-0.10 \pm 0.22$ | $0.19 \pm 0.22$ |                 |                 |
| CTAB  | $K_I$            | $K_M$            | $K_O$            | $h_I$           | $h_M$           | $h_O$           |
| $D_T$ | $0.03 \pm 0.23$  | $0.04 \pm 0.23$  | $-0.24 \pm 0.22$ | $0.15 \pm 0.22$ | $0.13 \pm 0.21$ | $0.19 \pm 0.20$ |
| $L_S$ | $-0.24 \pm 0.22$ | $0.01 \pm 0.23$  | $-0.28 \pm 0.22$ | $0.16 \pm 0.22$ | $0.19 \pm 0.22$ | $0.10 \pm 0.22$ |

(Cont.)

| PVP55k   | $K_T$            | $K_S$            | $h_T$            | $h_S$            |                  |                  |
|----------|------------------|------------------|------------------|------------------|------------------|------------------|
| $D_T$    | $-0.40 \pm 0.23$ | $-0.30 \pm 0.24$ | $0.52 \pm 0.20$  | $0.18 \pm 0.25$  |                  |                  |
| $L_S$    | $0.03 \pm 0.26$  | $0.09 \pm 0.26$  | $-0.10 \pm 0.26$ | $-0.12 \pm 0.26$ |                  |                  |
| PVP55k   | $K_I$            | $K_M$            | $K_O$            | $h_I$            | $h_M$            | $h_O$            |
| $D_T$    | $0.02 \pm 0.26$  | $0.15 \pm 0.26$  | $0.22 \pm 0.25$  | $-0.13 \pm 0.26$ | $0.36 \pm 0.24$  | $0.42 \pm 0.22$  |
| $L_S$    | $-0.21 \pm 0.25$ | $-0.10 \pm 0.26$ | $-0.39 \pm 0.23$ | $0.08 \pm 0.26$  | $-0.37 \pm 0.23$ | $-0.22 \pm 0.25$ |
| (Cont.)  |                  |                  |                  |                  |                  |                  |
| $\Gamma$ | $K_T$            | $K_S$            | $K_I$            | $K_M$            | $K_O$            |                  |
| $D_T$    | $-0.48 \pm 0.18$ | $0.17 \pm 0.21$  | $0.18 \pm 0.21$  | $0.16 \pm 0.21$  | $0.20 \pm 0.20$  |                  |
| $L_S$    | $-0.15 \pm 0.22$ | $-0.17 \pm 0.22$ | $-0.16 \pm 0.22$ | $-0.16 \pm 0.22$ | $-0.16 \pm 0.22$ |                  |

1423 **5.4 Contributions of under-coordinated atoms are insignificant compared with facet**  
1424 **orientations**

1425 In this work we attribute the main differences among regions, i.e., the corner/edge/flat facet regions  
1426 of nanoplates, or the tips/side regions of nanorods, to the underlying facets – the proportion of Au{111}  
1427 and Au{110}. We have considered another potential contribution to the difference, i.e., the under-  
1428 coordinated atoms. The corner and edge regions of nanoplates are mainly exposing Au{110}; they also  
1429 contain more under-coordinated atoms along the edges where the {111} and {110} facets meet compared  
1430 with the flat facet regions, which expose Au{111}. On the contrary, the tip regions of nanorods (mainly  
1431 Au{111}) have more under-coordinated atoms compared with the side regions (mainly Au{110}). For all  
1432 ligands studied in this work, comparing the trends of different regions across nanoplates and nanorods, we  
1433 found that  $K$  or  $h$  is dominated by the underlying facet instead of the under-coordinated atoms. For example,  
1434 comparing Supplementary Table 3 (nanoplates) and Supplementary Table 6 (nanorods),  $K_c^{\{110\}} >$   
1435  $K_e^{\{110\}} > K_f^{\{111\}}$ ,  $K_S^{\{110\}} > K_T^{\{111\}}$ ,  $h_c^{\{110\}} < h_e^{\{110\}} < h_f^{\{111\}}$ , and  $h_S^{\{110\}} < h_T^{\{111\}}$  for CTAB. That is, no matter  
1436 whether the {110} facets reside on the corners/edges of nanoplates (with more under-coordinated atoms)  
1437 or on the sides of nanorods (with fewer under-coordinated atoms), they show a larger  $K$  and smaller  $h$   
1438 compared to {111} facets. Therefore, the underlying facets were considered as the main structural  
1439 characteristics for ligand adsorption at different regions, between which the under-coordinated atoms have  
1440 less significant contributions.

1441 Of course, the differences of  $K$  and  $h$  in *sub-facet* regions, e.g., inner/middle/outer regions within  
1442 the *same* flat facets of a nanoplate, are attributed to the differences in density of structural defects which  
1443 are under-coordinated atoms compared with the regular facet atoms.

1444 **6 Supplementary control experiments and discussions on facet-controlled synthesis of Au**  
1445 **nanoparticles demonstrating the crossover behavior of ligand adsorption**

1446 **6.1 Ascorbic acid/ascorbate adsorption onto Au particles are likely insignificant in the presence of**  
1447 **CTAB**

1448 Ascorbic acid is a commonly used mild reducing agent for the reduction of Au precursors during  
1449 the synthesis of Au nanoparticles. Related to the discussion of the facet-controlled synthesis facilitated by  
1450 the selective adsorption of ligands, we evaluated the potential adsorption of ascorbic acid and ascorbate on  
1451 the Au surface, even though ascorbic acid and ascorbate were never discussed as a capping ligand in the  
1452 literature, to the best of our knowledge.

1453 In the reaction mixture of Au nanoparticle synthesis, the concentration of ascorbic acid is typically  
1454 on the order of 0.1 – 1 mM, and pH is 3 – 5. The  $pK_a$  of ascorbic acid is 4.2, so both the protonated acid  
1455 form (HA) and the deprotonated form ( $A^-$ ) have a significant portion in the solution. We attempted to  
1456 measure the adsorption affinity of HA and  $A^-$  on 5-nm Au nanoparticles via bulk COMPEITS titration. We  
1457 found that upon mixing resazurin (R) and excess HA in water, R is readily reduced by HA without  
1458 additional reducing agents or catalysts (Supplementary Fig. 21a). On the other hand, at pH 7.4 when [HA]  
1459 is negligible compared to [ $A^-$ ], very little change of absorbance of the mixture of R and  $A^-$  is observed over  
1460 18 min (Supplementary Fig. 21b), indicating that under basic conditions the direct reduction of R by  $A^-$  is

1461 negligible even if thermodynamically favorable. In the reaction mixture consisting of R, NH<sub>2</sub>OH, and 5-  
 1462 nm Au nanoparticles, higher [A<sup>-</sup>] led to higher reaction rates (Supplementary Fig. 21c). In this case,  
 1463 ascorbate appears to act as a catalytic promoter phenomenologically. This catalytic rate promotion effect  
 1464 allows for the estimation of A<sup>-</sup> adsorption affinity to Au nanoparticles through a concentration titration and  
 1465 fitting through an empirical kinetic saturation equation<sup>24</sup>:

$$v_0 = \frac{aK_{1/2}[L]}{1 + K_{1/2}[L]} + b \quad \text{Eq. S21}$$

1466 where  $K_{1/2}$  is an apparent adsorption equilibrium constant and at  $[L] = 1/K_{1/2}$ , the reaction rate reaches 50%  
 1467 of the maximum (saturation) rate. Fitting the titration curve of ascorbate (Supplementary Fig. 21c) gives  
 1468  $K_{1/2} \sim 6.4 \times 10^2 \text{ M}^{-1}$  for A<sup>-</sup>, about three orders of magnitude smaller than  $K_{\text{CTAB}} (\sim 6.0 \times 10^5 \text{ M}^{-1})$ . In addition,  
 1469 [CTAB] is higher than [HA] + [A<sup>-</sup>] in a typical synthesis. Therefore, unless  $K_{\text{HA}}$  is much larger than  $K_{\text{A}^-}$   
 1470 (which we believe is unlikely), the adsorption of ascorbate or ascorbic acid onto Au particles is probably  
 1471 insignificant compared with the adsorption of CTAB.

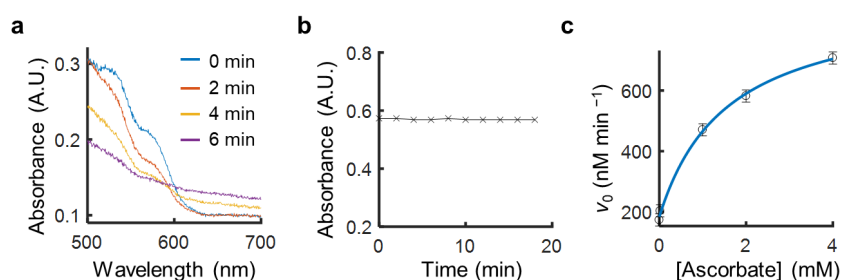

1472 **Supplementary Fig. 21 | Estimation of the binding affinity of ascorbic acid/ascorbate on 5-nm Au nanoparticles.** **a**, Evolution  
 1473 of the reduction of R by AA in water, characterized by UV-Vis spectroscopy.  $[R]_0 = 10 \mu\text{M}$ ,  $[\text{HA}]_0 + [\text{A}^-]_0 = 1.0 \text{ mM}$ . **b**, Time  
 1474 evolution of the absorbance of the mixture of  $10 \mu\text{M}$  of R and  $1.0 \text{ mM}$  of A<sup>-</sup> in  $7 \text{ mM}$  pH 7.4 phosphate buffer at  $604 \text{ nm}$  (the  
 1475 maximum adsorption wavelength of R under basic conditions). **c**, Initial rate of the reduction of R as a function of [ascorbate].  
 1476 Reaction conditions:  $[R]_0 = 10 \mu\text{M}$ ,  $[\text{NH}_2\text{OH}]_0 = 1.0 \text{ mM}$ ,  $[\text{Au nanoparticle}] = 0.01 \text{ nM}$  in  $7 \text{ mM}$  pH 7.4 phosphate buffer. Fitting  
 1477 of the curve gives  $K_{1/2} = 0.64 \pm 0.21 \text{ mM}^{-1}$ ,  $a = 0.72 + 0.18 \mu\text{M}/\text{min}$ ,  $b = 0.18 + 0.02 \mu\text{M}/\text{min}$ .  
 1478

## 1479 6.2 Potential contribution of Au species adsorption in the facet-controlled Au nanoparticle 1480 synthesis

1481 In the HAuCl<sub>4</sub> reduction by AA in the presence of CTAB to make Au nanoparticles, after the  
 1482 formation of nuclei, the growth of Au nanoparticles could come from the deposition of Au(0) atoms on the  
 1483 nuclei or existing nanoparticles. The Au(0) atoms could come from the growth solution, or could be  
 1484 generated from the reduction of adsorbed Au species, e.g., Au(I) or Au(III) species, on the nanoparticles<sup>38,39</sup>.  
 1485 We could not probe the adsorption of Au(I) or Au(III) species on Au nanoparticles using COMPEITS –  
 1486 these species are only stable in acidic conditions (the condition for Au nanoparticle synthesis) whereas the  
 1487 fluorogenic probe reaction for COMPEITS imaging used in this work requires slightly basic conditions,  
 1488 because the product molecule resorufin is only highly fluorescent in its deprotonated form.

1489 Nevertheless, we rationalize that the potential preferential adsorption of Au species on different  
 1490 facets should have a minor role in shaping nanoparticles. If the Au species were to have significant  
 1491 preferences over a certain facet, one would not need to add additional stabilization ligand for shape control.  
 1492 The fact is that particles without a dominating facet is obtained if no stabilizer is used in the synthesis<sup>5,40</sup>.

1493 Above all, in our colloidal Au nanoparticle synthesis, the reactants (HAuCl<sub>4</sub> and ascorbic acid) are  
 1494 kept constant and only CTAB's concentration was varied to achieve different dominance of {111} vs. {110}  
 1495 facets on the resulting particles. It is reasonable to conclude that CTAB is the dominant player in controlling  
 1496 the surface facets, instead of other species in the solution; this conclusion is also consistent with many other  
 1497 studies of CTAB-controlled Au nanoparticle synthesis<sup>5,38,39</sup>.

1498 **6.3 The CTAB concentrations in Au nanoparticle syntheses are all below the critical micelle**  
1499 **concentration at the reaction temperature**

1500 CTAB molecules are well-documented to aggregate and form micelles at concentrations above its  
1501 critical micelle concentration (CMC). When the micelles appear, the number of free CTAB molecules in  
1502 the solution will not be the same as that dissolved in the solution. In order to avoid the effect of micelle  
1503 formation on CTAB adsorption, the Au nanoparticle syntheses were conducted at CTAB concentrations  
1504 below the CMC. According to literature, the CMC of CTAB is strongly dependent on temperature, which  
1505 can be depicted by a power law<sup>41-43</sup>:

$$\text{CMC} \propto T^n \quad \text{Eq. S22}$$

1506 where the exponent  $n > 1$ . Supplementary Fig. 22 shows the temperature-dependent CMC of CTAB. At 30  
1507 °C, the CMC of CTAB is 1.68 mM and increases to 2.15 mM at an elevated temperature of 45 °C<sup>43</sup>. By  
1508 extracting the points and fitting them based on a linear relationship, the CMC at 85 °C (our synthesis  
1509 reaction temperature) is derived to be 3.46 mM (Supplementary Fig. 22). It should be pointed out that  
1510 compared with the power law ( $n > 1$ ) shown in Eq. S21, the CMC of CTAB at 85 °C derived from a linear  
1511 relationship should be a lower estimate, meaning that the true CMC at 85 °C should be greater than 3.46  
1512 mM. Regarding the Au nanoparticle syntheses that were conducted at 85 °C, the highest [CTAB] was 3.12  
1513 mM, which is below 3.46 mM, the lower estimate of the CMC. Additionally, the crossover concentration  
1514 of CTAB derived from our experiments is approximately 2 mM (Fig. 4j), much lower than the expected  
1515 CMC at 85 °C. Based on these results, we are confident to conclude that the effect of micelle formation of  
1516 CTAB should be insignificant in our experiments.

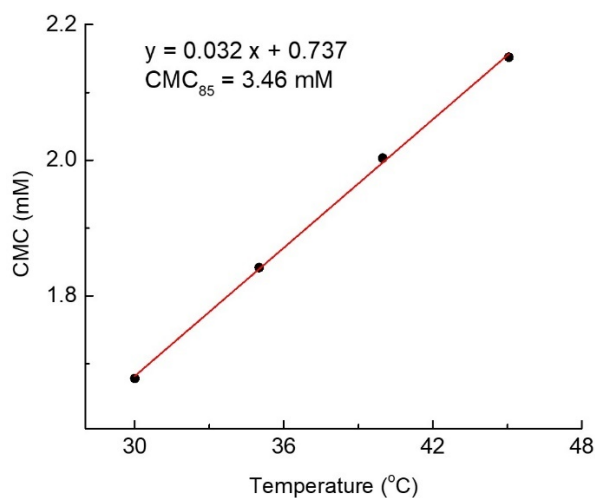

1517 **Supplementary Fig. 22 | Extrapolating the temperature-dependent critical micelle concentration of CTAB from the**  
1518 **reported dependence on temperature.** Based on a linear fitting of the points, the CMC of CTAB at 85 °C is estimated as 3.46  
1519 mM. The data points were extracted from a reported study<sup>43</sup>.  
1520

1521 **6.4 Possible reasons for the existence of crossover behavior of CTAB adsorption on Au{110} vs.**  
1522 **Au{111}**

1523 Given  $K^{\{110\}} > K^{\{111\}}$  for CTAB adsorption on Au surface as we determined in this study, the  
1524 existence of crossover behavior of CTAB indicates  $\rho_{\max}^{\{110\}} < \rho_{\max}^{\{111\}}$ , meaning that the saturated adsorption  
1525 density of CTAB on Au{110} is lower than that on Au{111}. One possible reason lies in the different  
1526 surface packing density of Au atoms on different facets. The surface packing density of Au atoms on the  
1527 {110} facets is noticeably lower than that on {111} facets (56% vs. 91%), which may result in a smaller  
1528 number of sites for CTAB adsorption. Another possible contribution could originate from the facet-  
1529 dependent adsorption configuration of CTAB. According to literature, both small and big molecules can  
1530 have distinctive adsorption configurations on various facets<sup>44,45</sup>. One compelling example can be found in

1531 the adsorption of F-containing peptide S7 (sequence, SSFPQPN; S, Serine; F, Phenylalanine; P, Proline; Q,  
1532 Glutamine; N, Asparagine) on Pt surfaces, in which the peptide shows “lie-flat” and “stand-up”  
1533 configurations on Pt{100} and Pt{111}, respectively<sup>44</sup>. The difference in adsorption configuration will then  
1534 impose differentiable steric hindrance and thus affect the molecule adsorption. Nevertheless, our  
1535 measurements cannot provide information on the molecular level adsorption configuration of CTAB on Au  
1536 surfaces.

## 1537 **6.5 Predicting the crossover concentration $c_x$**

1538 One might predict whether a crossover concentration exists for two facets, and if yes, calculate the  
1539 value of  $c_x$ . At the crossover concentration,  $\rho_{\max}^{\text{strong}} = \rho_{\max}^{\text{weak}}$ . On the basis of a non-cooperative Langmuir  
1540 adsorption (assuming  $h = 1$  for simplicity for Eq. 1), one can get

$$c_x = \frac{\rho_{\max}^{\text{strong}} K^{\text{strong}} - \rho_{\max}^{\text{weak}} K^{\text{weak}}}{K^{\text{strong}} K^{\text{weak}} (\rho_{\max}^{\text{weak}} - \rho_{\max}^{\text{strong}})} \quad \text{Eq.S23}$$

1541 It is worth noting that the adsorption equilibrium constant is typically dependent on temperature. Therefore,  
1542 the predicted  $c_x$  will be temperature-dependent. Note for  $c_x$  to have a positive value, which is a prerequisite  
1543 for the application of the cross-over concept for shape-controlled synthesis for other metals/materials,  $\rho_{\max}^{\text{weak}}$   
1544 has to be greater than  $\rho_{\max}^{\text{strong}}$ .

## 1545 **6.6 Potential broader applications of the crossover behavior of ligand adsorption**

1546 The crossover behavior of CTAB adsorption on Au{111} vs. Au{110} enabled us to control the facet  
1547 distribution during Au nanoparticle synthesis by simply tuning [CTAB] in the solution. We envision that  
1548 this crossover adsorption behavior of ligands on solid particles can potentially have other broader  
1549 applications:

- 1550 1) In controlled synthesis of nanoparticles
  - 1551 a. Nanoparticle surface carving via selective etching: Here the ligand molecules can serve as  
1552 an etchant, and by tuning the etchant concentration, one can selectively etch one facet vs.  
1553 another.
  - 1554 b. Ligand-induced galvanic replacement for the generation of various hollow structures: Here  
1555 the ligand work as an agent to assist galvanic replacement, and turning the ligand can  
1556 perhaps tune the replacement toward one specific facet.
  - 1557 c. Facet-selective deposition on a solid particle: For example, one can selectively deposit  
1558 metal onto semiconductor particles, or a second metal onto existing metal particles, while  
1559 tuning the concentration of a ligand to vary the accessibility of respective facets.
- 1560 2) In surface modification of nanoparticles
  - 1561 a. Surface functionalization: one can use a ligand to change the relative accessibility of two  
1562 different facets and then add a functionalization reagent to modify preferentially one facet  
1563 vs. the other.
  - 1564 b. Ligand exchange: One can selectively exchange ligands on one facet to change the surface  
1565 property, for example, from hydrophilic to hydrophobic.
- 1566 3) In heterogeneous catalysis
  - 1567 a. Product selectivity control: If different facets of a catalyst have different product selectivity,  
1568 one might tune the ratio of different products via tuning the concentration or partial  
1569 pressure of the reactant, or tuning the concentration or partial pressure of a ligand that  
1570 blocks one facet.
  - 1571 b. Catalyst poisoning mitigation and thus durability improvement: One can tune the  
1572 concentration of a reagent to slow down the generation rate of a poisonous intermediate or  
1573 product on one facet, leading to prolonged usage of the catalyst.

## 1574 **6.7 Predicting relative multi-layer adsorption trends**

1575 Our estimation of the density of adsorbed ligands from Eq. 2 is applicable in the regime of  
1576 monolayer adsorption, as it is based on the Langmuir adsorption model on which the Hill model of  
1577 cooperativity is added. Consistently, our COMPEITS imaging specifically probes the first-layer adsorption,  
1578 because multi-layer adsorption does not provide further suppression of the fluorogenic auxiliary reaction  
1579 rate. However, the ligands we studied here, including CTAB, could potentially have multi-layer adsorption  
1580 on Au surfaces. Nevertheless, the monolayer adsorption scenario as in Eq 2 likely still offers useful  
1581 predictions on the relative adsorption density of the same ligand on two different surfaces under the same  
1582 conditions, e.g., the adsorption of CTAB on different Au facets. The key differences of the multi-layer  
1583 adsorption from the monolayer adsorption are the stacking of ligands in the dimension perpendicular to the  
1584 surface and the resultant intermolecular interactions of these ligands. Therefore, if one ligand shows a larger  
1585 adsorption density on one surface over another under monolayer adsorption conditions, the same preference  
1586 should preserve in multi-layer adsorption, because the intermolecular interactions of ligands in the  
1587 perpendicular dimension should be comparable on different surfaces, unless long-range interactions  
1588 between the ligand and the surfaces occur.

## 1589 **6.8 The crossover behavior in our shape-controlled synthesis of Au nanoparticles should not be** 1590 **caused by the seeding effect**

1591 The geometry differences from synthesis with varying [CTAB] are attributed to the ligand  
1592 adsorption behaviors throughout the synthesis time rather than from the initial seeding. Our synthesis was  
1593 a one-pot approach and does not involve the use of pre-formed seeds, but we understand that nuclei, also  
1594 called seeds, could still be in situ generated during the nucleation process of a one-pot synthesis. The type  
1595 of seeds could potentially affect the shape taken by a product particle because the internal structure (e.g.,  
1596 single-crystal vs. twinned structure) could somewhat constrain the shape expression of nanocrystals.  
1597 However, for nanocrystals growing from the same seeds (i.e., same internal structure), they can still be  
1598 diverse in shapes depending on the properties of a capping agent or facet directing reagent. For example,  
1599 single-crystal seeds can grow into cubes and octahedra; penta-twinned seeds can grow into decahedra and  
1600 nanorods; planer-defect seeds can grow into nanoplates and nanocubes<sup>46</sup>. All these examples of distinctive  
1601 pairs of particle products are characterized by both different shapes and different facets, despite the same  
1602 internal structure. Therefore, the crossover behavior in the facet distribution of our synthesis with varying  
1603 [CTAB] should stem from the ligand adsorption rather than the seeding effect.

## 1604 **7 Supplementary references**

- 1605
- 1606 1. Shankar, S. S. *et al.* Biological synthesis of triangular gold nanoprisms. *Nat. Mater.* **3**, 482-488 (2004).
  - 1607 2. Andoy, N. M. *et al.* Single-molecule catalysis mapping quantifies site-specific activity and uncovers  
1608 radial activity gradient on single 2D nanocrystals. *J. Am. Chem. Soc.* **135**, 1845-1852 (2013).
  - 1609 3. Kan, C., Wang, G., Zhu, X., Li, C. & Cao, B. Structure and thermal stability of gold nanoplates. *Appl.*  
1610 *Phys. Lett.* **88**, 071904 (2006).
  - 1611 4. Xie, J., Lee, J. Y. & Wang, D. I. C. Synthesis of single-crystalline gold nanoplates in aqueous solutions  
1612 through biomineralization by serum albumin protein. *J. Phys. Chem. C* **111**, 10226-10232 (2007).
  - 1613 5. Grzelczak, M., Pérez-Juste, J., Mulvaney, P. & Liz-Marzán, L. M. Shape control in gold nanoparticle  
1614 synthesis. *Chem. Soc. Rev.* **37**, 1783-1791 (2008).
  - 1615 6. Wang, C. *et al.* Synthesis of high-yield gold nanoplates: fast growth assistant with binary surfactants. *J.*  
1616 *Nanomater.* **2010**, 969030 (2010).
  - 1617 7. Zhou, X. *et al.* Quantitative super-resolution imaging uncovers reactivity patterns on single  
1618 nanocatalysts. *Nat. Nanotechnol.* **7**, 237-241 (2012).
  - 1619 8. Botella, P., Corma, A. & Navarro, M. T. Single gold nanoparticles encapsulated in monodispersed  
1620 regular spheres of mesostructured silica produced by pseudomorphic transformation. *Chem. Mater.*  
1621 **19**, 1979-1983 (2007).

- 1622 9. Stöber, W., Fink, A. & Bohn, E. Controlled growth of monodisperse silica spheres in the micron size  
1623 range. *J. Colloid Interface Sci.* **26**, 62-69 (1968).
- 1624 10. Liz-Marzán, L. M., Giersig, M. & Mulvaney, P. Synthesis of Nanosized Gold–Silica Core–Shell  
1625 Particles. *Langmuir* **12**, 4329-4335 (1996).
- 1626 11. Aliaga, C. *et al.* Sum frequency generation and catalytic reaction studies of the removal of organic  
1627 capping agents from Pt nanoparticles by UV–ozone treatment. *J. Phys. Chem. C* **113**, 6150-6155  
1628 (2009).
- 1629 12. Scarabelli, L., Sánchez-Iglesias, A., Pérez-Juste, J. & Liz-Marzán, L. M. A “Tips and Tricks”  
1630 Practical Guide to the Synthesis of Gold Nanorods. *J. Phys. Chem. Lett.* **6**, 4270-4279 (2015).
- 1631 13. Wang, Z. L., Gao, R. P., Nikoobakht, B. & El-Sayed, M. A. Surface reconstruction of the unstable  
1632 {110} surface in gold nanorods. *J. Phys. Chem. B* **104**, 5417-5420 (2000).
- 1633 14. Gai, P. L. & Harmer, M. A. Surface atomic defect structures and growth of gold nanorods. *Nano Lett.*  
1634 **2**, 771-774 (2002).
- 1635 15. Johnson, C. J., Dujardin, E., Davis, S. A., Murphy, C. J. & Mann, S. Growth and form of gold  
1636 nanorods prepared by seed-mediated, surfactant-directed synthesis. *J. Mater. Chem.* **12**, 1765-1770  
1637 (2002).
- 1638 16. Jana, N. R., Gearheart, L. & Murphy, C. J. Wet chemical synthesis of high aspect ratio cylindrical  
1639 gold nanorods. *J. Phys. Chem. B* **105**, 4065-4067 (2001).
- 1640 17. Wuttig, A., Yaguchi, M., Motobayashi, K., Osawa, M. & Surendranath, Y. Inhibited proton transfer  
1641 enhances Au-catalyzed CO<sub>2</sub>-to-fuels selectivity. *Proc. Natl. Acad. Sci. U.S.A.* **113**, E4585-E4593  
1642 (2016).
- 1643 18. Herrero, E., Buller, L. J. & Abruña, H. D. Underpotential deposition at single crystal surfaces of Au,  
1644 Pt, Ag and other materials. *Chem. Rev.* **101**, 1897-1930 (2001).
- 1645 19. Hill, A. V. The possible effects of the aggregation of the molecules of haemoglobin on its dissociation  
1646 curves. *J. Physiol. (Lond.)* **40**, 4-7 (1910).
- 1647 20. Villarreal, E., Li, G. G., Zhang, Q., Fu, X. & Wang, H. Nanoscale Surface Curvature Effects on  
1648 Ligand–Nanoparticle Interactions: A Plasmon-Enhanced Spectroscopic Study of Thiolated Ligand  
1649 Adsorption, Desorption, and Exchange on Gold Nanoparticles. *Nano Lett.* **17**, 4443-4452 (2017).
- 1650 21. Cornish-Bowden, A. *Fundamentals of enzyme kinetics*. (John Wiley & Sons, 2013).
- 1651 22. Mao, X., Liu, C., Hesari, M., Zou, N. & Chen, P. Super-resolution imaging of non-fluorescent  
1652 reactions via competition. *Nat. Chem.* **11**, 687-694 (2019).
- 1653 23. Xu, W., Kong, J. S., Yeh, Y.-T. E. & Chen, P. Single-molecule nanocatalysis reveals heterogeneous  
1654 reaction pathways and catalytic dynamics. *Nat. Mater.* **7**, 992-996 (2008).
- 1655 24. Zou, N. M. *et al.* Cooperative communication within and between single nanocatalysts. *Nat. Chem.*  
1656 **10**, 607-614 (2018).
- 1657 25. Chen, T.-Y. *et al.* Concentration- and chromosome-organization-dependent regulator unbinding from  
1658 DNA for transcription regulation in living cells. *Nat. Commun.* **6**, 7445 (2015).
- 1659 26. Sambur, J. B. *et al.* Sub-particle reaction and photocurrent mapping to optimize catalyst-modified  
1660 photoanodes. *Nature* **530**, 77-80 (2016).
- 1661 27. Thompson, R. E., Larson, D. R. & Webb, W. W. Precise Nanometer Localization Analysis for  
1662 Individual Fluorescent Probes. *Biophys. J.* **82**, 2775-2783 (2002).
- 1663 28. Rust, M. J., Bates, M. & Zhuang, X. Sub-diffraction-limit imaging by stochastic optical reconstruction  
1664 microscopy (STORM). *Nat. Methods* **3**, 793-796 (2006).
- 1665 29. Bates, M., Huang, B., Dempsey, G. T. & Zhuang, X. Multicolor Super-Resolution Imaging with  
1666 Photo-Switchable Fluorescent Probes. *Science* **317**, 1749-1753 (2007).
- 1667 30. Chen, S. *et al.* Rapid seedless synthesis of gold nanoplates with microscaled edge length in a high  
1668 yield and their application in SERS. *Nanomicro. Lett.* **8**, 328-335 (2016).
- 1669 31. Meena, S. K. *et al.* The role of halide ions in the anisotropic growth of gold nanoparticles: a  
1670 microscopic, atomistic perspective. *Phys. Chem. Chem. Phys.* **18**, 13246-13254 (2016).
- 1671 32. Rubinstein, M. & Colby, R. H. in *Polymer Physics* 114 (Oxford University Press).

- 1672 33. Ghosh, S. & Manna, L. The many “facets” of halide ions in the chemistry of colloidal inorganic  
1673 nanocrystals. *Chem. Rev.* **118**, 7804-7864 (2018).
- 1674 34. Magnussen, O. M. Ordered anion adlayers on metal electrode surfaces. *Chem. Rev.* **102**, 679-726  
1675 (2002).
- 1676 35. Almora-Barrios, N., Novell-Leruth, G., Whiting, P., Liz-Marzán, L. M. & López, N. Theoretical  
1677 description of the role of halides, silver, and surfactants on the structure of gold nanorods. *Nano Lett.*  
1678 **14**, 871-875 (2014).
- 1679 36. Ravi, V., Binz, J. M. & Rioux, R. M. Thermodynamic profiles at the solvated inorganic–organic  
1680 interface: The case of gold–thiolate monolayers. *Nano Lett.* **13**, 4442-4448 (2013).
- 1681 37. Schessler, H. M., Karpovich, D. S. & Blanchard, G. J. Quantitating the balance between enthalpic and  
1682 entropic forces in alkanethiol/gold monolayer self assembly. *J. Am. Chem. Soc.* **118**, 9645-9651  
1683 (1996).
- 1684 38. Yang, T.-H. *et al.* Toward a quantitative understanding of the reduction pathways of a salt precursor  
1685 in the synthesis of metal nanocrystals. *Nano Lett.* **17**, 334-340 (2017).
- 1686 39. Yang, T.-H., Gilroy, K. D. & Xia, Y. Reduction rate as a quantitative knob for achieving deterministic  
1687 synthesis of colloidal metal nanocrystals. *Chem. Sci.* **8**, 6730-6749 (2017).
- 1688 40. Lohse, S. E. & Murphy, C. J. The quest for shape control: A history of gold nanorod synthesis. *Chem.*  
1689 *Mater.* **25**, 1250-1261 (2013).
- 1690 41. Zieliński, R., Ikeda, S., Nomura, H. & Kato, S. Effect of temperature on micelle formation in aqueous  
1691 solutions of alkyltrimethylammonium bromides. *J. Colloid Interface Sci.* **129**, 175-184 (1989).
- 1692 42. Gonzalez-Perez, A. & Sanchez-Dominguez, M. Changes in self-assemblies induced by temperature,  
1693 concentration and light. *Front. Biosci.* **5**, 611-630 (2013).
- 1694 43. Cooney, G. A. & Obunwo, C. C. Effects of sodium bromide salt and temperature on the behaviour of  
1695 aqueous solution of cetyltrimethylammonium bromide. *IOSR J. Appl. Chem.* **7**, 34-38 (2014).
- 1696 44. Ruan, L. *et al.* Tailoring molecular specificity toward a crystal facet: a lesson from biorecognition  
1697 toward Pt{111}. *Nano Lett.* **13**, 840-846 (2013).
- 1698 45. Liu, P., Qin, R., Fu, G. & Zheng, N. Surface coordination chemistry of metal nanomaterials. *J. Am.*  
1699 *Chem. Soc.* **139**, 2122-2131 (2017).
- 1700 46. Shi, Y. *et al.* Noble-Metal Nanocrystals with Controlled Shapes for Catalytic and Electrocatalytic  
1701 Applications. *Chem. Rev.* **121**, 649-735 (2021).
- 1702
- 1703
