# Supplementary material for: Nanoscale cooperative adsorption for materials control
Source: PubMed Central journal article supplement (PMC8277846; doi:10.1038/s41467-021-24590-y), 2021-07-13
Supplement: 41467_2021_24590_MOESM3_ESM.pdf [file 41467_2021_24590_MOESM3_ESM.pdf]

## **Description of Additional Supplementary Files**

File Name: Supplementary Software 1

Description: MatLab codes for data analysis
